# Supplementary material
Source: PubMed Central journal article supplement (PMC2906235)

**Synthesis of Reblastatin, Autolytimycin, Non-Benzoquinone Analogs:  
Potent Inhibitors of Heat Shock Protein 90 (Hsp90)**

Iwona E. Wrona,<sup>†</sup> Alexander Gozman,<sup>‡</sup> Tony Taldone,<sup>‡</sup> Gabriela Chiosis<sup>‡</sup> and James S. Panek<sup>\*†</sup>

*Department of Chemistry and Center for Chemical Methodology and Library Development (CMLD-BU),  
Metcalf Center for Science and Engineering, 590 Commonwealth Avenue, Boston University, Boston,  
Massachusetts 02215, and Department of Medicine and Program in Molecular Pharmacology and Chemistry,  
Memorial Sloan-Kettering Cancer Center, 1275 York Avenue, New York, New York 10021.*

**Table of Contents**

|                                                                                                                                                                                                                                                                                                                                                |          |
|------------------------------------------------------------------------------------------------------------------------------------------------------------------------------------------------------------------------------------------------------------------------------------------------------------------------------------------------|----------|
| <sup>1</sup> H and <sup>13</sup> C NMR Spectra of intermediate <b>11b</b>                                                                                                                                                                                                                                                                      | SI-30,31 |
| <sup>1</sup> H and <sup>13</sup> C NMR Spectra of intermediate <b>15b</b>                                                                                                                                                                                                                                                                      | SI-32,33 |
| <sup>1</sup> H and <sup>13</sup> C NMR Spectra of intermediate <b>17b</b>                                                                                                                                                                                                                                                                      | SI-34,35 |
| <sup>1</sup> H and <sup>13</sup> C NMR Spectra of intermediate <b>19b</b>                                                                                                                                                                                                                                                                      | SI-36,37 |
| <sup>1</sup> H and <sup>13</sup> C NMR Spectra of intermediate <b>20b</b>                                                                                                                                                                                                                                                                      | SI-38,39 |
| <sup>1</sup> H and <sup>13</sup> C NMR Spectra of intermediate <b>21b</b>                                                                                                                                                                                                                                                                      | SI-40,41 |
| <sup>1</sup> H and <sup>13</sup> C NMR Spectra of intermediate <b>22b</b>                                                                                                                                                                                                                                                                      | SI-42,43 |
| <sup>1</sup> H and <sup>13</sup> C NMR Spectra of intermediate <b>31</b>                                                                                                                                                                                                                                                                       | SI-44,45 |
| <sup>1</sup> H and <sup>13</sup> C NMR Spectra of intermediate <b>32</b>                                                                                                                                                                                                                                                                       | SI-46,47 |
| <sup>1</sup> H and <sup>13</sup> C NMR Spectra of intermediate <b>33b</b>                                                                                                                                                                                                                                                                      | SI-48,49 |
| <sup>1</sup> H and <sup>13</sup> C NMR Spectra of intermediate <b>34b</b>                                                                                                                                                                                                                                                                      | SI-50,51 |
| <sup>1</sup> H and <sup>13</sup> C NMR Spectra of intermediate <b>35</b>                                                                                                                                                                                                                                                                       | SI-52,53 |
| <sup>1</sup> H and <sup>13</sup> C NMR Spectra of (2 <i>E</i> ,4 <i>Z</i> ,6 <i>S</i> ,7 <i>S</i> ,8 <i>E</i> ,10 <i>S</i> ,11 <i>R</i> ,12 <i>S</i> ,14 <i>R</i> )-15-(3-(benzyloxy)-5-bromo-2-methoxyphenyl)-7-( <i>tert</i> -butyldimethylsilyloxy)-6,12-dimethoxy-11-(methoxymethoxy)-2,8,10,14-tetramethylpentadeca-2,4,8-trienamide      | SI-54,55 |
| <sup>1</sup> H and <sup>13</sup> C NMR Spectra of (2 <i>E</i> ,4 <i>Z</i> ,6 <i>S</i> ,7 <i>S</i> ,8 <i>E</i> ,10 <i>S</i> ,11 <i>R</i> ,12 <i>S</i> ,14 <i>R</i> )-ethyl 15-(3-(benzyloxy)-5-bromo-2-methoxyphenyl)-7-( <i>tert</i> -butyldimethylsilyloxy)-6,12-dimethoxy-11-(methoxymethoxy)-2,8,10,14-tetramethylpentadeca-2,4,8-trienoate | SI-56,57 |
| <sup>1</sup> H and <sup>13</sup> C NMR Spectra of intermediate <b>36</b>                                                                                                                                                                                                                                                                       | SI-58,59 |

|                                                                                                                                                                                                                                                                                                                            |          |
|----------------------------------------------------------------------------------------------------------------------------------------------------------------------------------------------------------------------------------------------------------------------------------------------------------------------------|----------|
| <sup>1</sup> H and <sup>13</sup> C NMR Spectra of 1-(benzyloxy)-3-bromo-5-((2 <i>R</i> ,4 <i>S</i> ,5 <i>R</i> ,6 <i>S</i> )-4-methoxy-5-(methoxymethoxy)-2,6-dimethyloct-7-enyl)benzene                                                                                                                                   | SI-60,61 |
| <sup>1</sup> H and <sup>13</sup> C NMR Spectra of 1-(benzyloxy)-3-bromo-5-((2 <i>R</i> ,4 <i>S</i> ,5 <i>R</i> ,6 <i>S</i> )-4-methoxy-5-(methoxymethoxy)-2,6-dimethyloct-7-ynyl)benzene                                                                                                                                   | SI-62,63 |
| <sup>1</sup> H and <sup>13</sup> C NMR Spectra of (2 <i>E</i> ,6 <i>S</i> ,7 <i>S</i> ,8 <i>E</i> ,10 <i>S</i> ,11 <i>R</i> ,12 <i>S</i> ,14 <i>R</i> )-15-(3-(benzyloxy)-5-bromophenyl)-7-( <i>tert</i> -butyldimethylsilyloxy)-6,12-dimethoxy-11-(methoxymethoxy)-2,8,10,14-tetramethylpentadeca-2,8-dienamide           | SI-64,65 |
| <sup>1</sup> H and <sup>13</sup> C NMR Spectra of (4 <i>E</i> ,8 <i>S</i> ,9 <i>S</i> ,10 <i>E</i> ,12 <i>S</i> ,13 <i>R</i> ,14 <i>S</i> ,16 <i>R</i> )- carbamic acid 20-(benzyloxy)-8,14-dimethoxy-13-(methoxymethoxy)-4,10,12,16-tetramethyl-3-oxo-2-aza-bicyclo[16.3.1]docosa-1(21),4,10,18(22),19-pentaen-9-yl ester | SI-66,67 |
| <sup>1</sup> H and <sup>13</sup> C NMR Spectra of (2 <i>S</i> ,3 <i>S</i> ,5 <i>S</i> ,6 <i>S</i> )-methyl 6-(3-(benzyloxy)-5-bromophenyl)-3-methoxy-5-methyltetrahydro-2 <i>H</i> -pyran-2-carboxylate                                                                                                                    | SI-68,69 |
| <sup>1</sup> H and <sup>13</sup> C NMR Spectra of (2 <i>E</i> ,6 <i>S</i> ,7 <i>S</i> ,8 <i>E</i> ,10 <i>S</i> ,11 <i>R</i> ,12 <i>S</i> ,14 <i>R</i> )-ethyl 15-(3-(benzyloxy)-5-bromophenyl)-7-( <i>tert</i> -butyldimethylsilyloxy)-6,12-dimethoxy-11-(methoxymethoxy)-2,8,10,14-tetramethylpentadeca-2,8-dienoate      | SI-70,71 |
| <sup>1</sup> H and <sup>13</sup> C NMR Spectra of Reblastatin ( <b>1</b> )                                                                                                                                                                                                                                                 | SI-72,73 |
| <sup>1</sup> H and <sup>13</sup> C NMR Spectra of Autolytimycin ( <b>2</b> )                                                                                                                                                                                                                                               | SI-74,75 |
| <sup>1</sup> H and <sup>13</sup> C NMR Spectra of Analog ( <b>6</b> )                                                                                                                                                                                                                                                      | SI-76,77 |
| <sup>1</sup> H and <sup>13</sup> C NMR Spectra of Analog ( <b>7</b> )                                                                                                                                                                                                                                                      | SI-78,79 |
| <sup>1</sup> H and <sup>13</sup> C NMR Spectra of Analog ( <b>8</b> )                                                                                                                                                                                                                                                      | SI-80,81 |
| <sup>1</sup> H and <sup>13</sup> C NMR Spectra of Analog ( <b>9</b> )                                                                                                                                                                                                                                                      | SI-82,83 |
| <sup>1</sup> H and <sup>13</sup> C NMR Spectra of Compound ( <b>15a</b> )                                                                                                                                                                                                                                                  | SI-84,85 |
| <sup>1</sup> H and <sup>13</sup> C NMR Spectra of Compound ( <b>26</b> )                                                                                                                                                                                                                                                   | SI-86,87 |
| <sup>1</sup> H and <sup>13</sup> C NMR Spectra of Compound ( <b>27</b> )                                                                                                                                                                                                                                                   | SI-88,89 |
| <sup>1</sup> H and <sup>13</sup> C NMR Spectra of Compound ( <b>28</b> )                                                                                                                                                                                                                                                   | SI-90,91 |
| <sup>1</sup> H and <sup>13</sup> C NMR Spectra of Compound ( <b>33a</b> )                                                                                                                                                                                                                                                  | SI-92,93 |
| <sup>1</sup> H and <sup>13</sup> C NMR Spectra of Compound ( <b>34a</b> )                                                                                                                                                                                                                                                  | SI-94,95 |

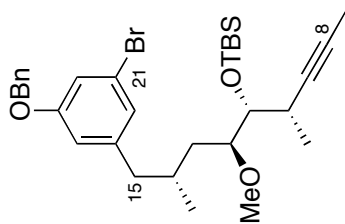

11b

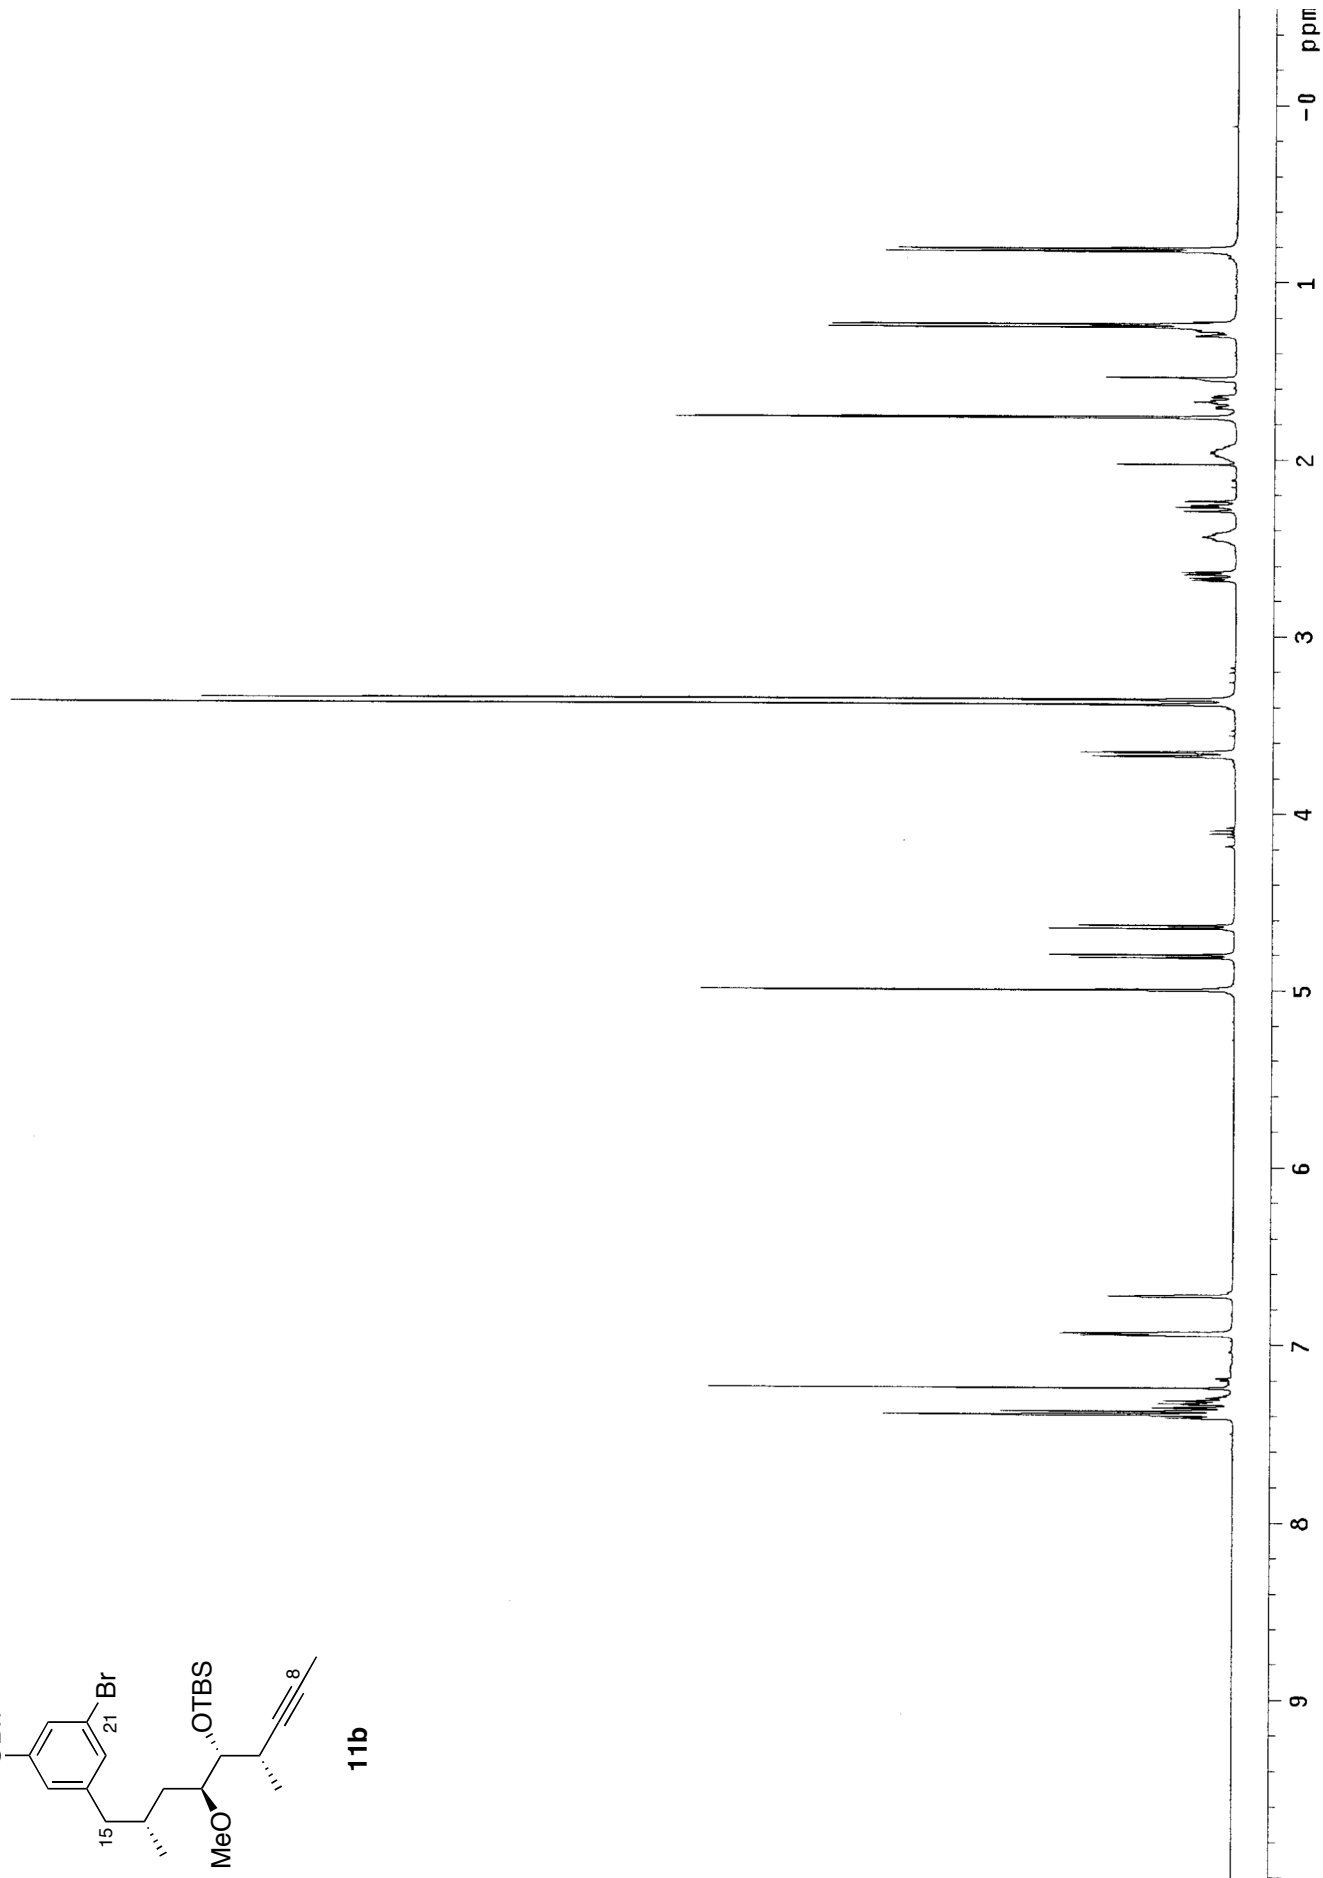

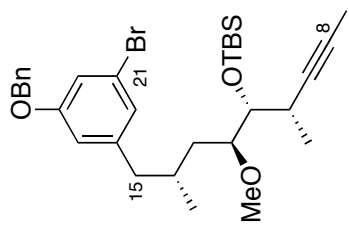

11b

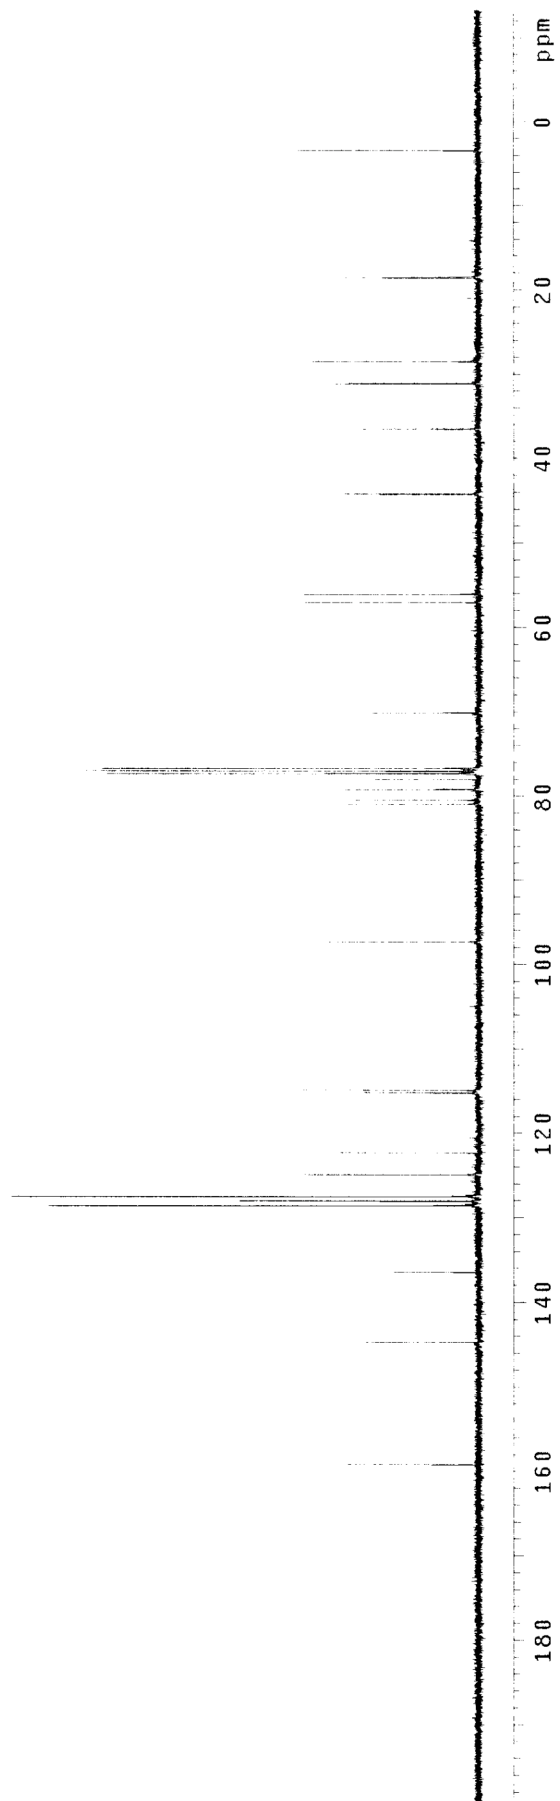

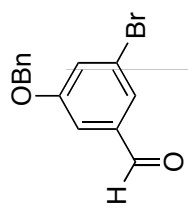

15b

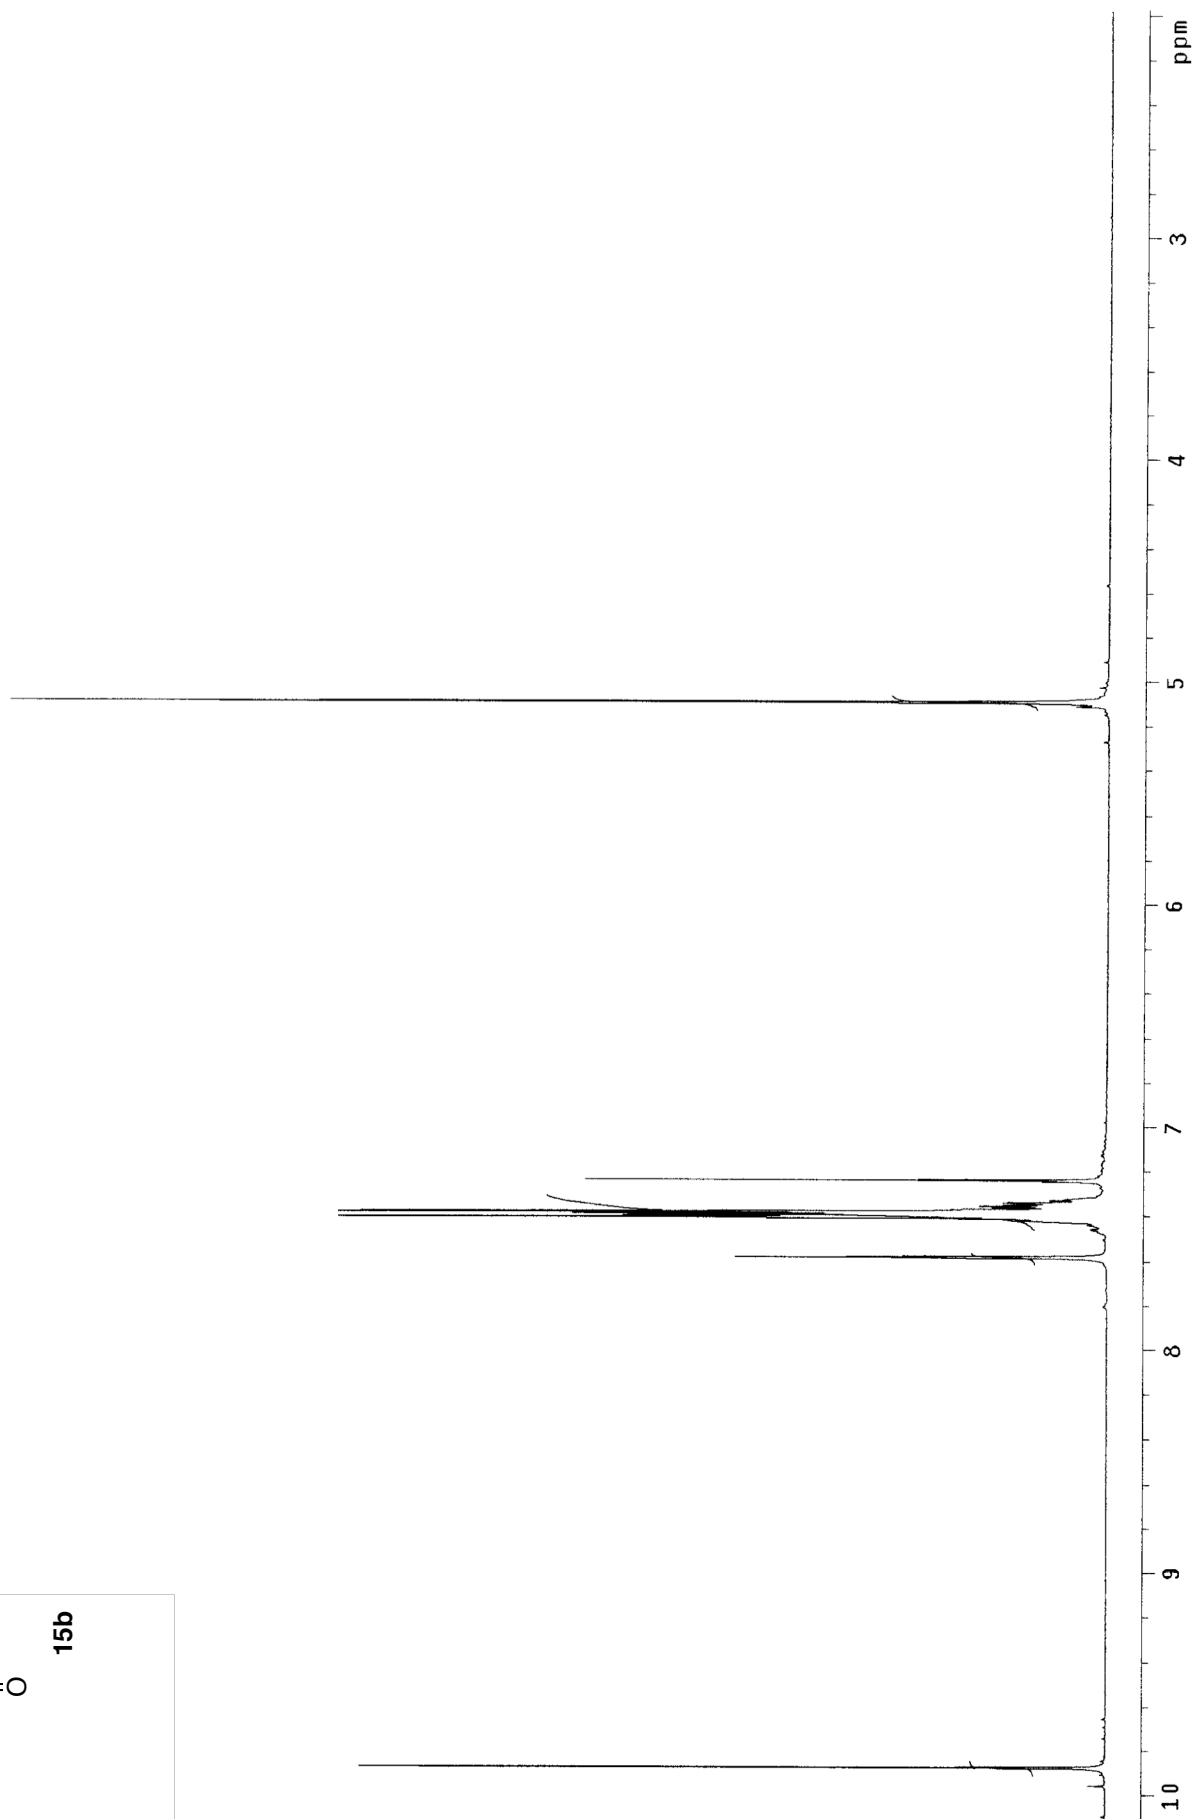

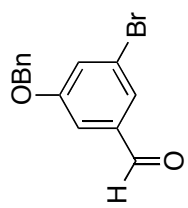

15b

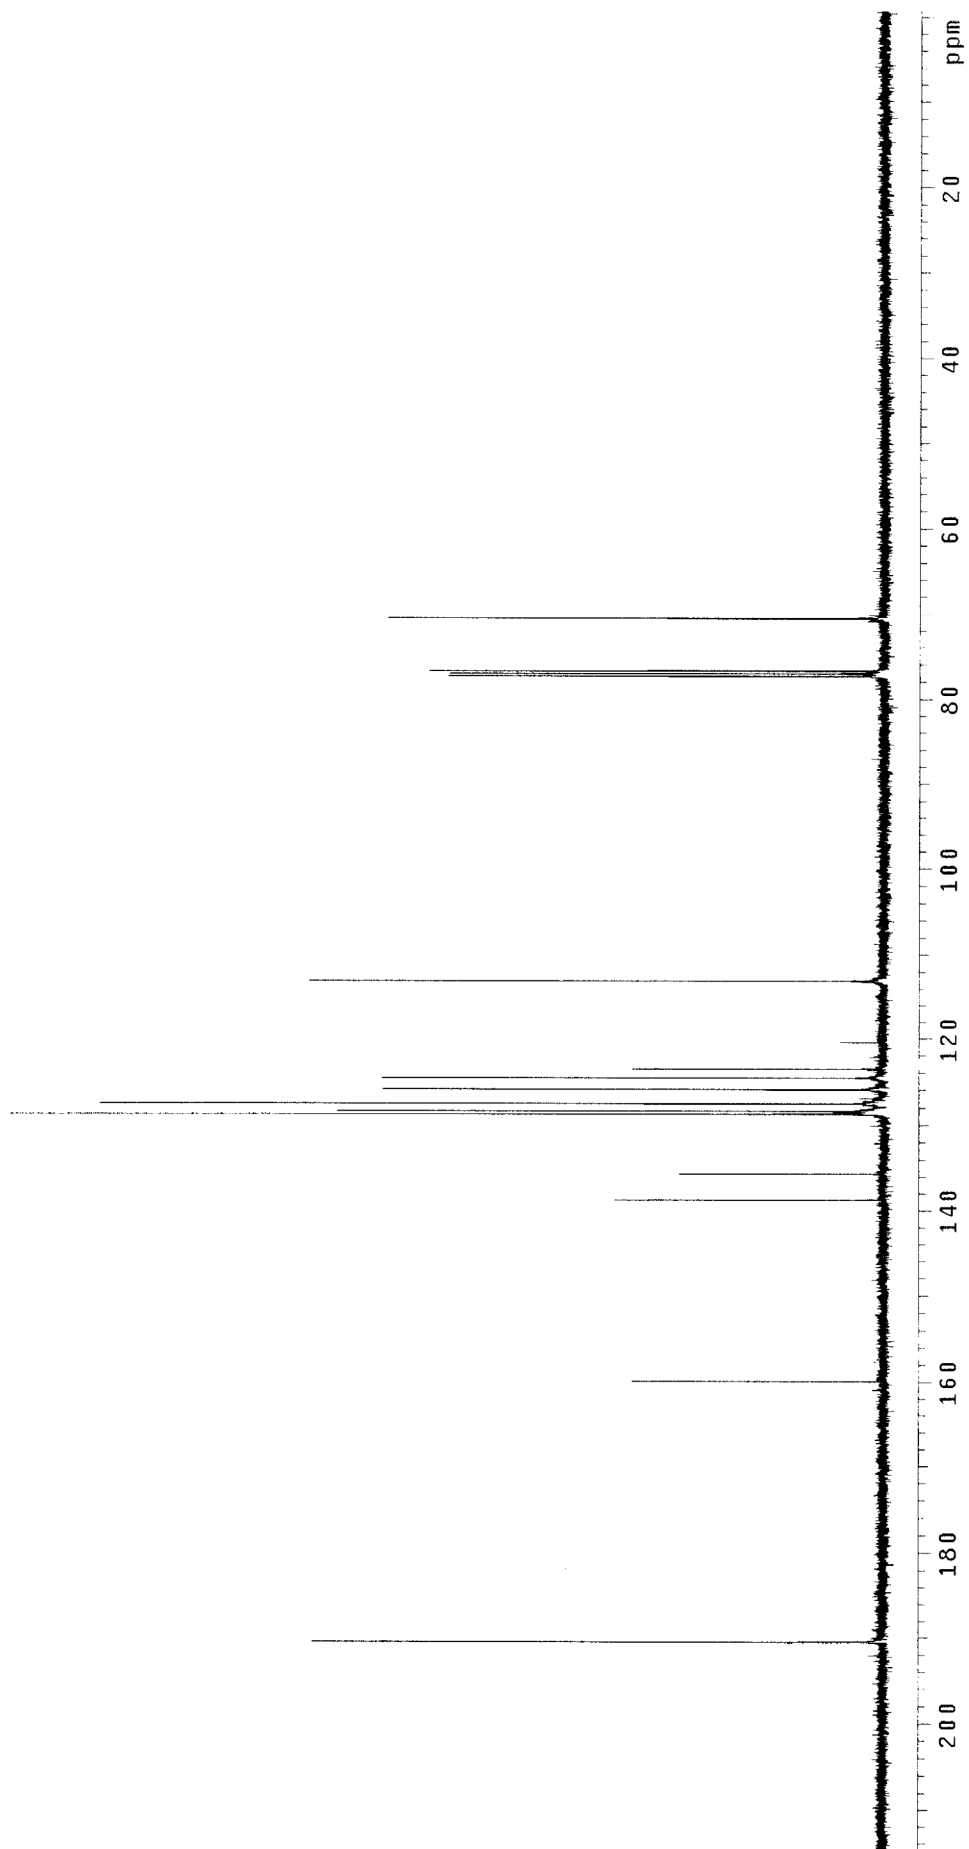

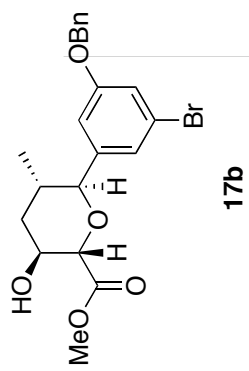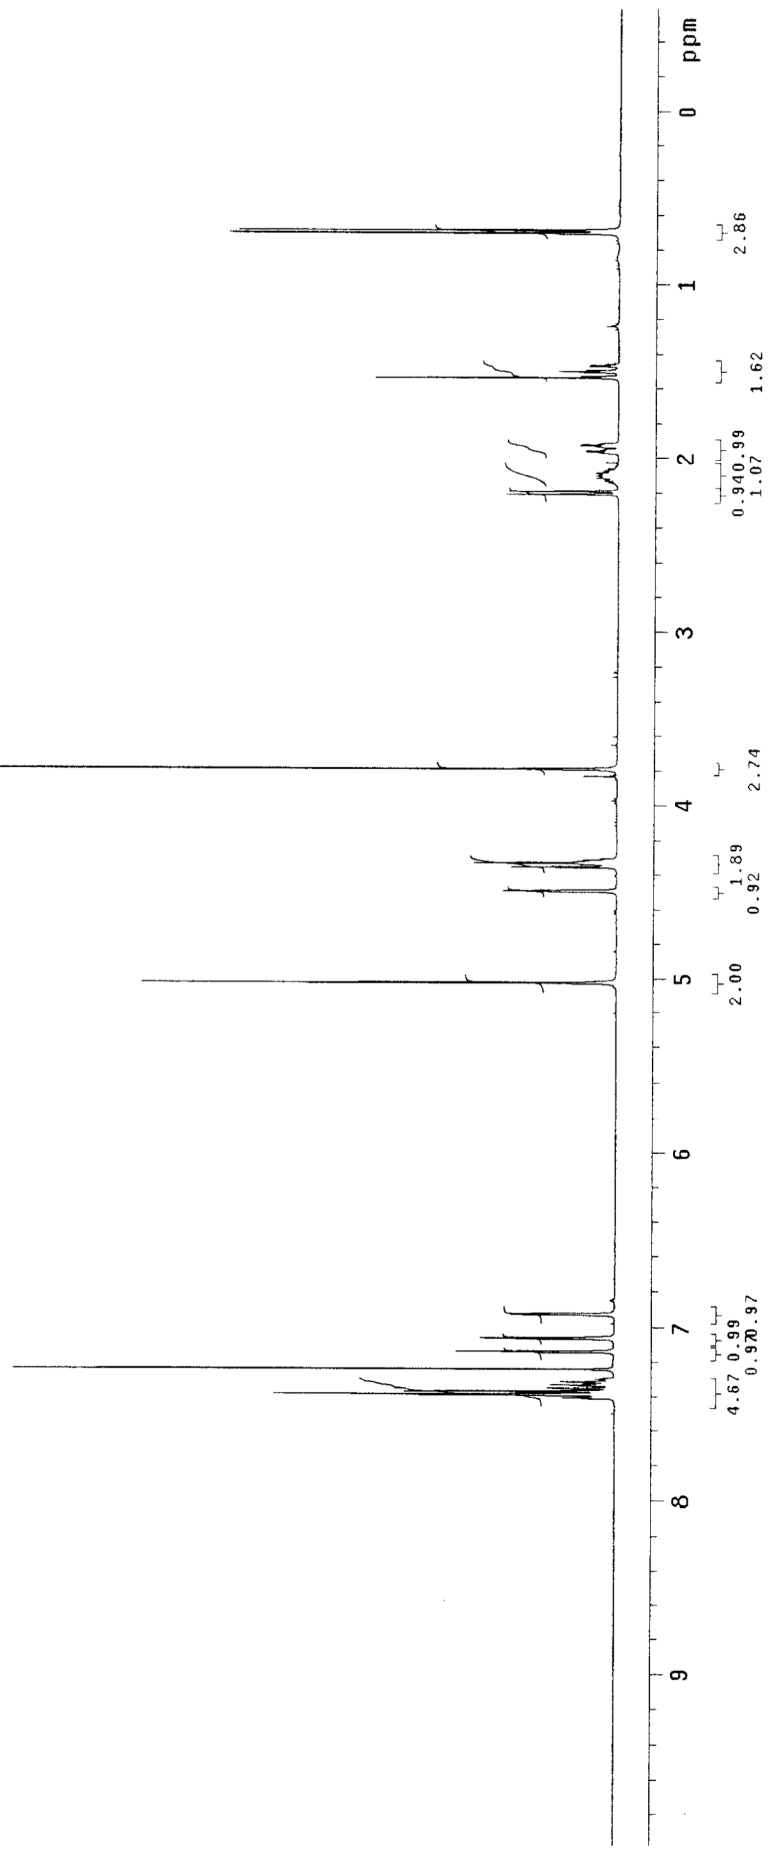

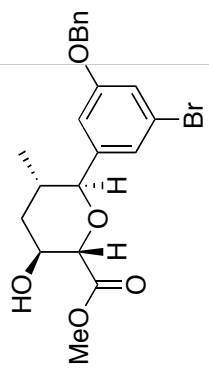

17b

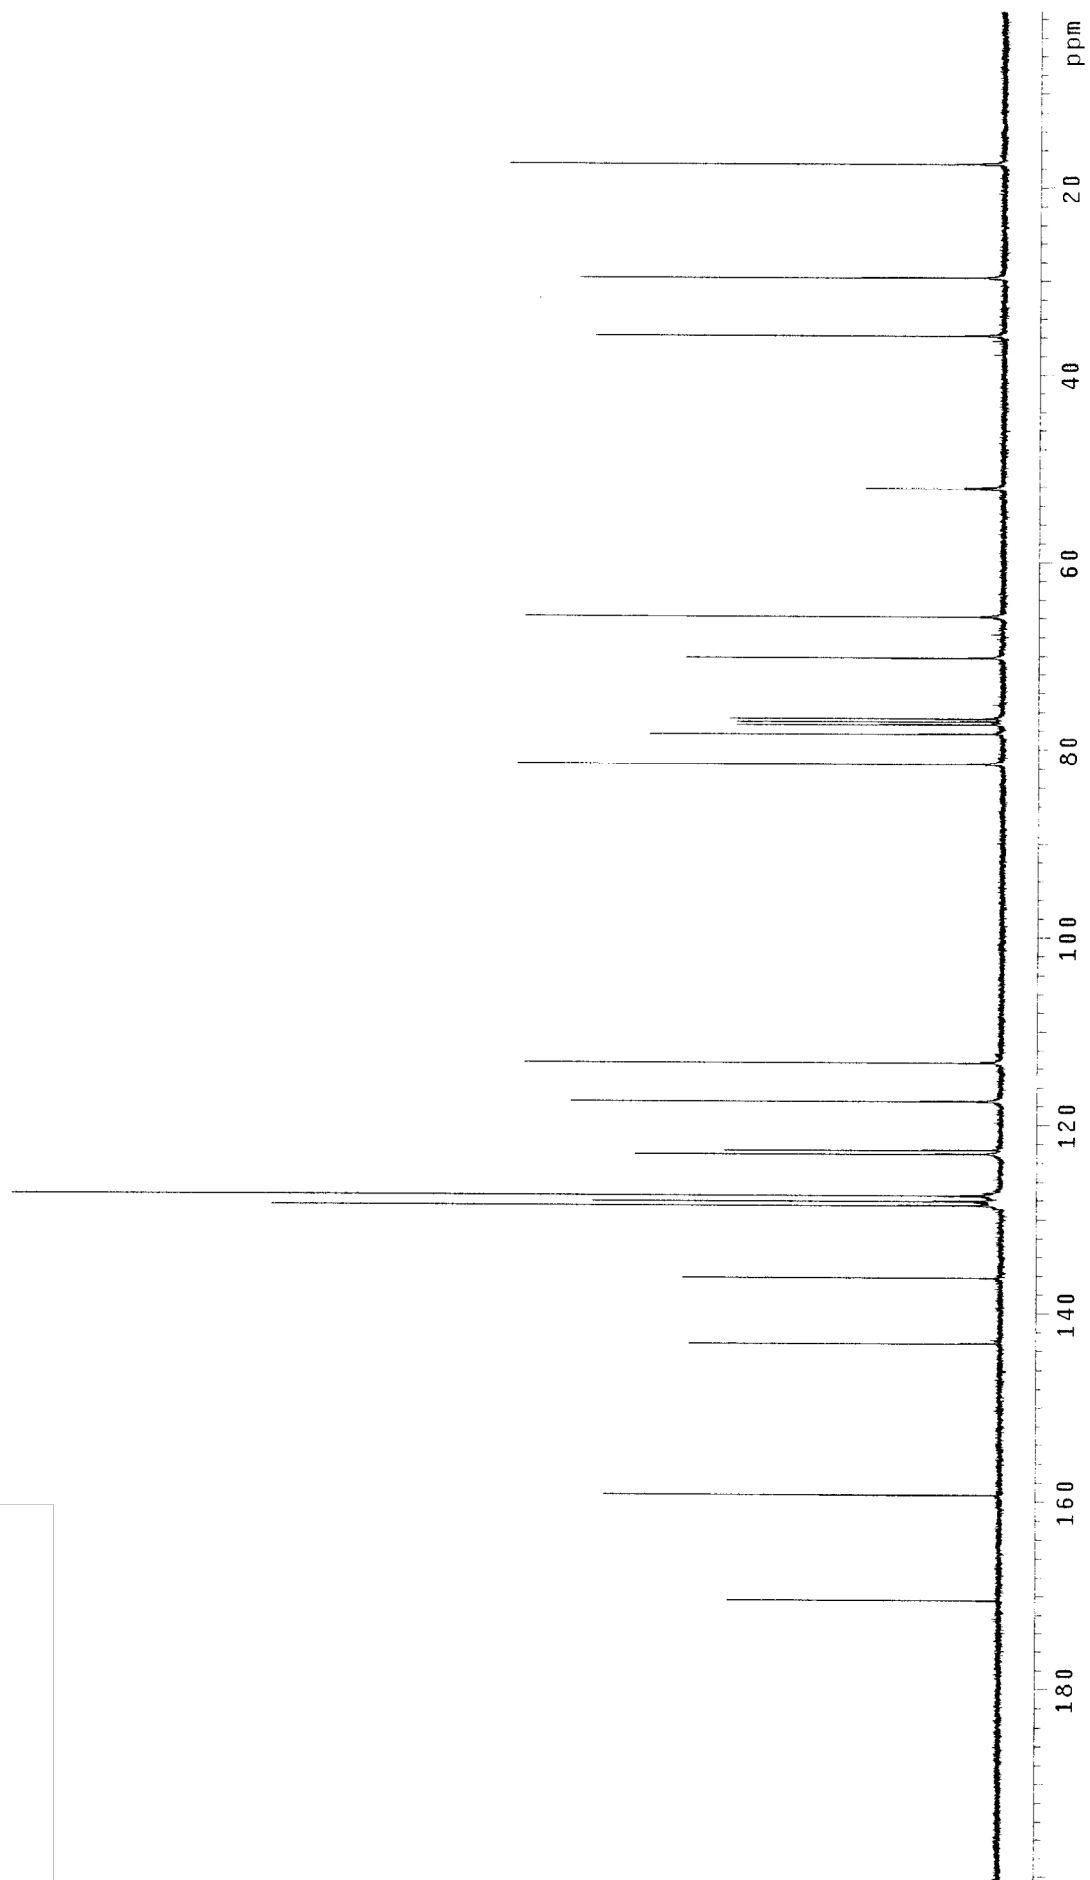



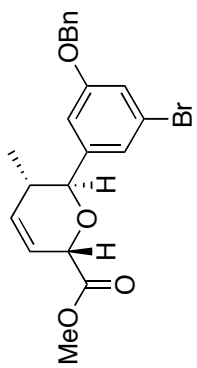

19b

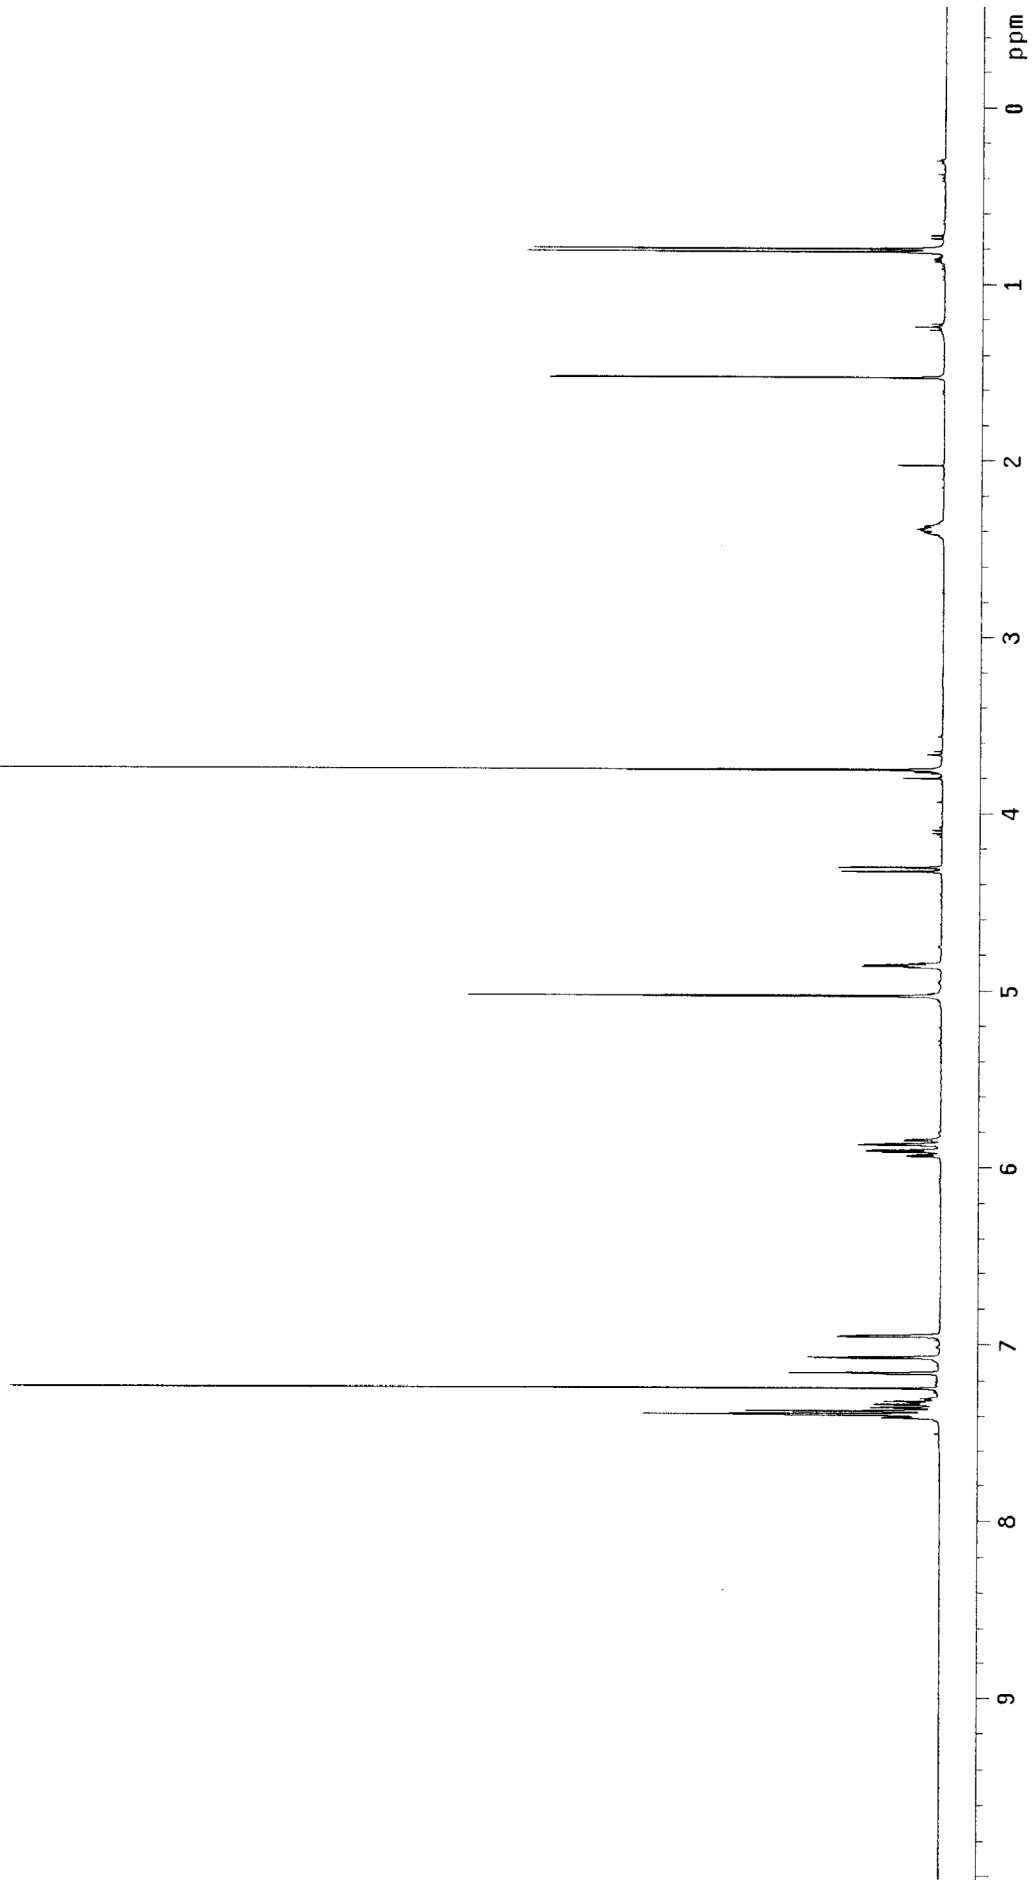

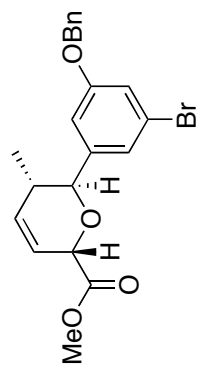

19b

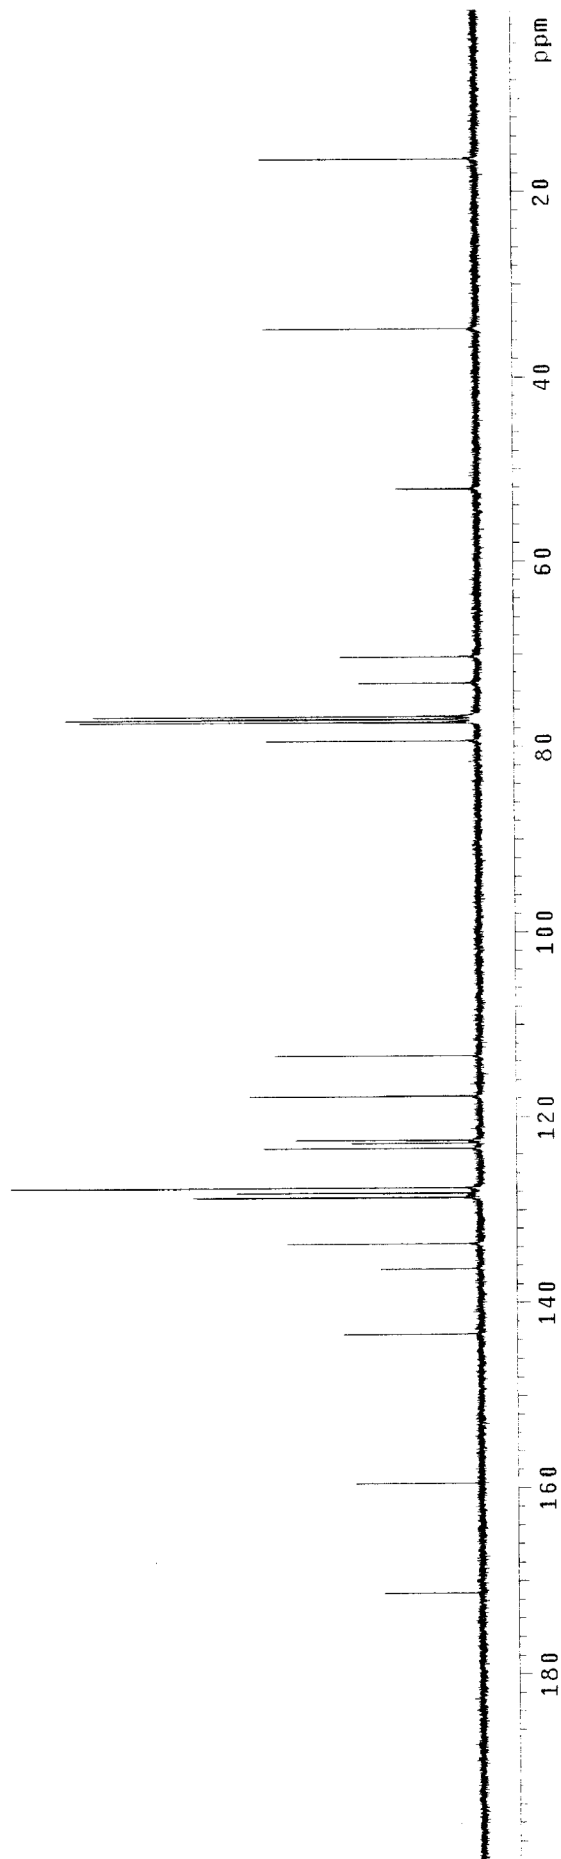

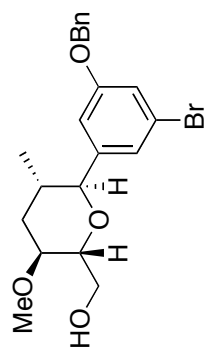

20b

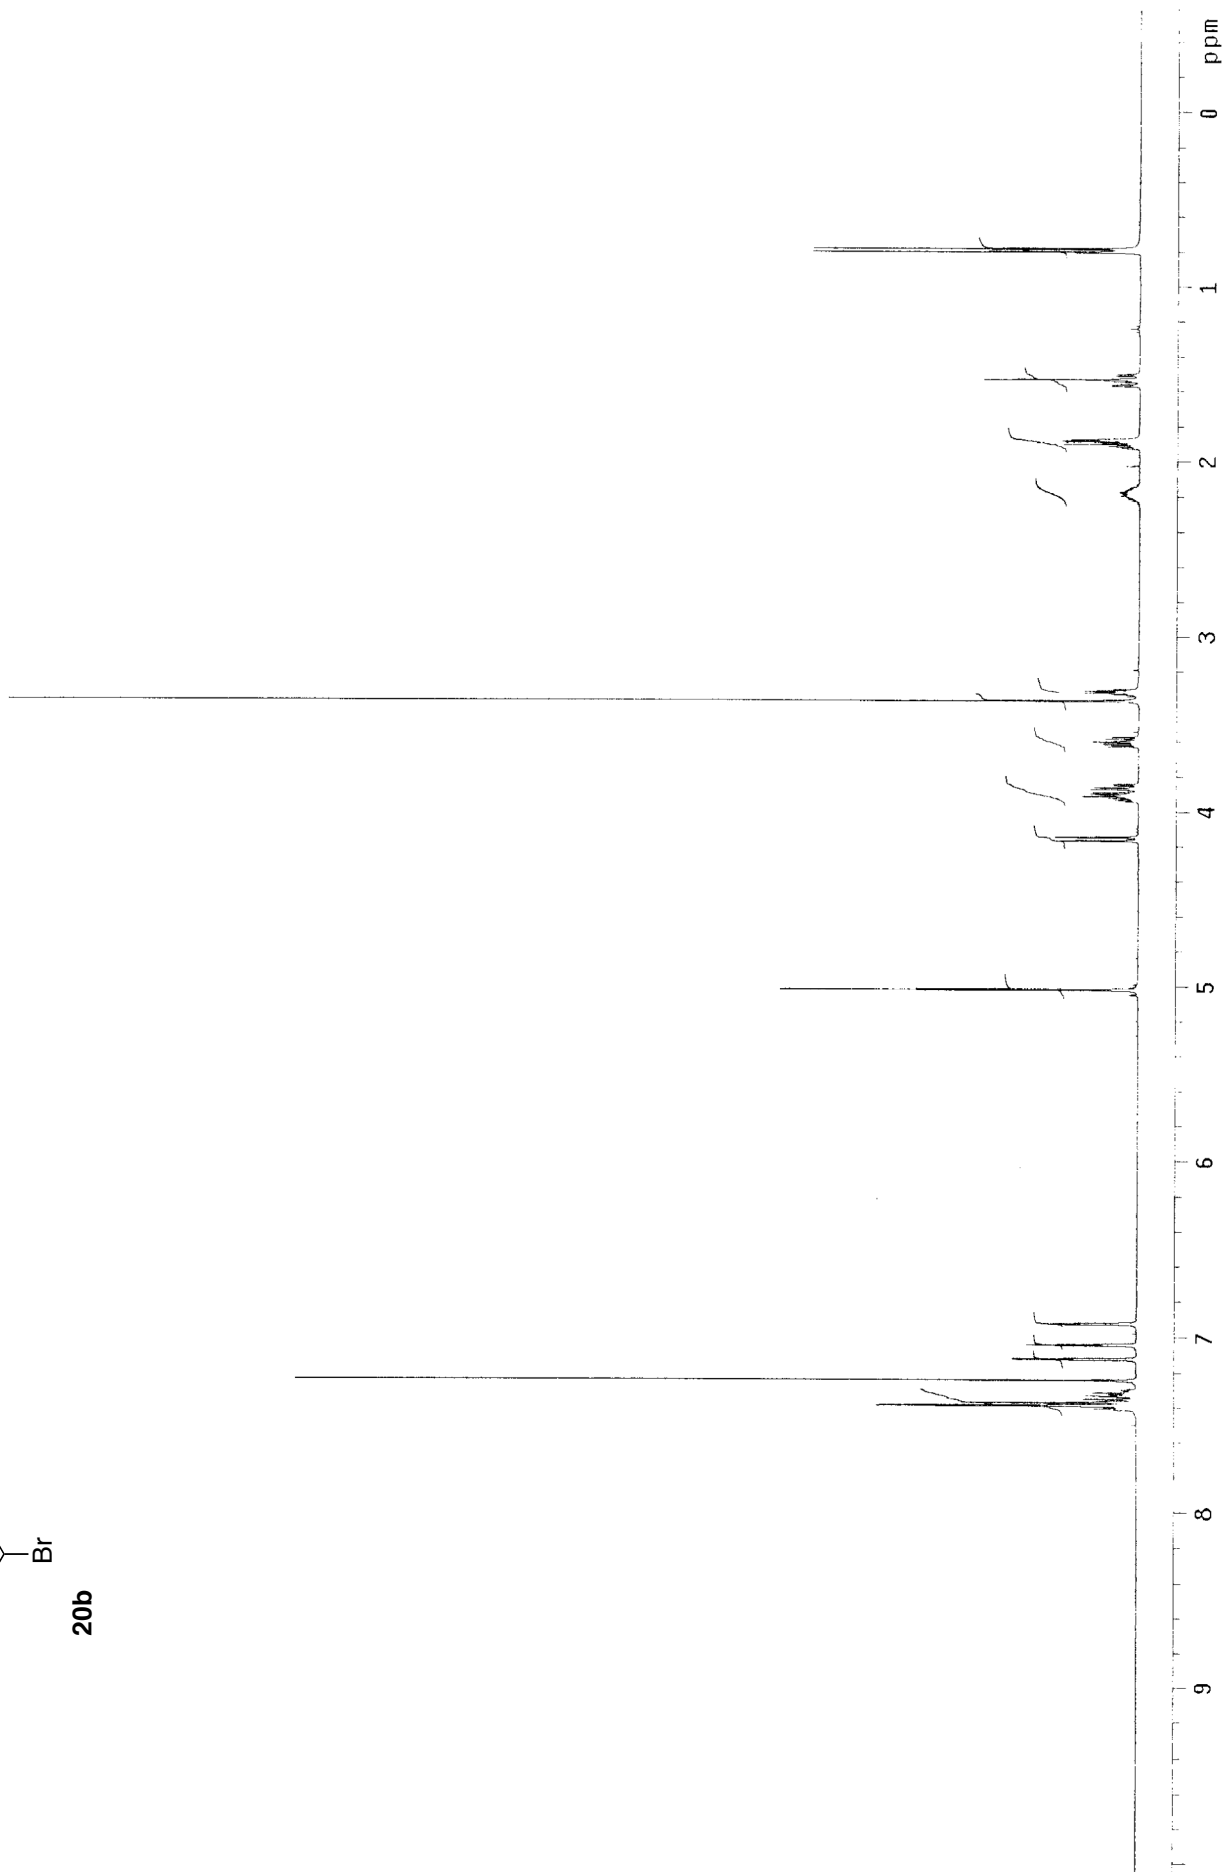

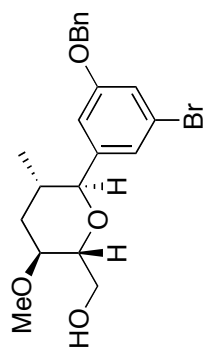

20b

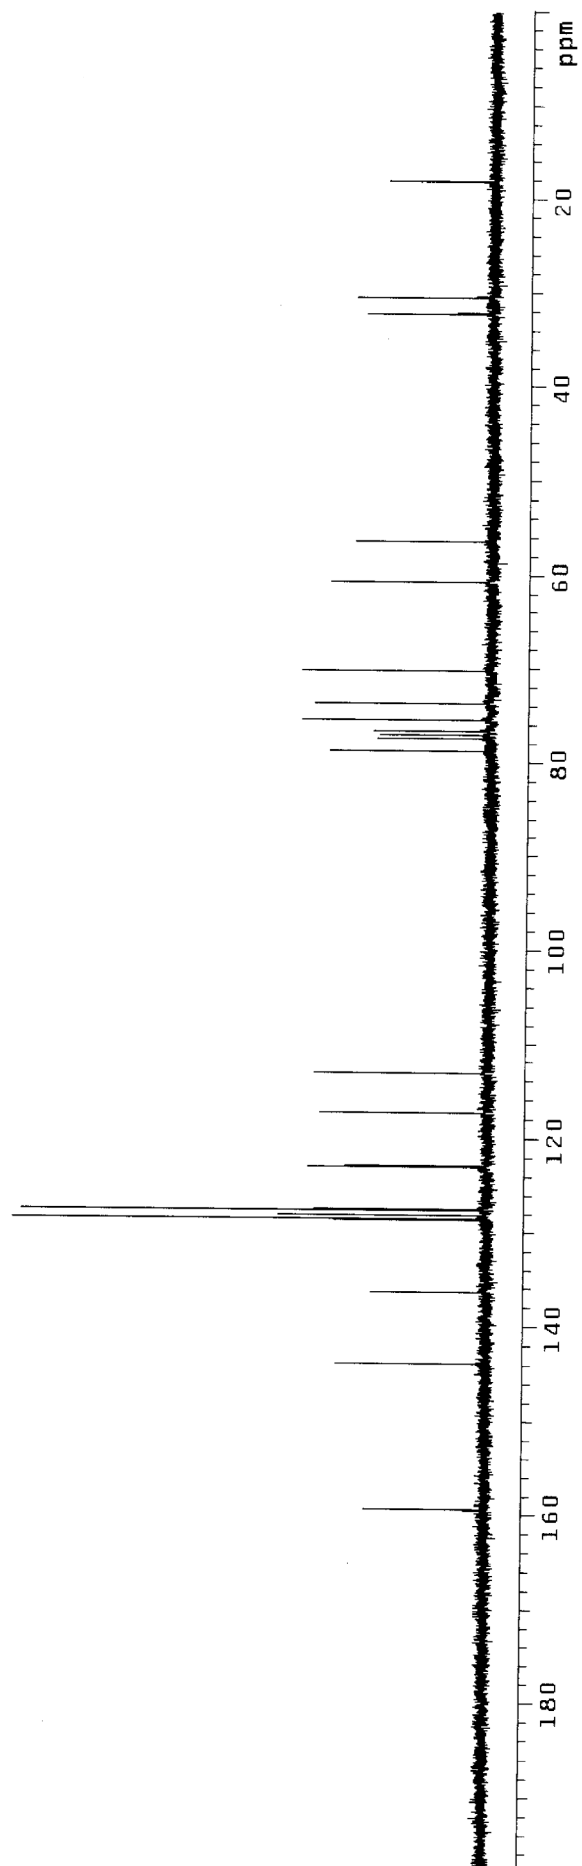

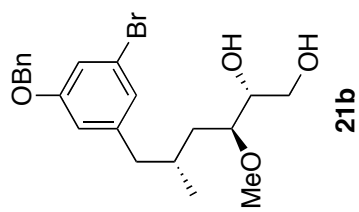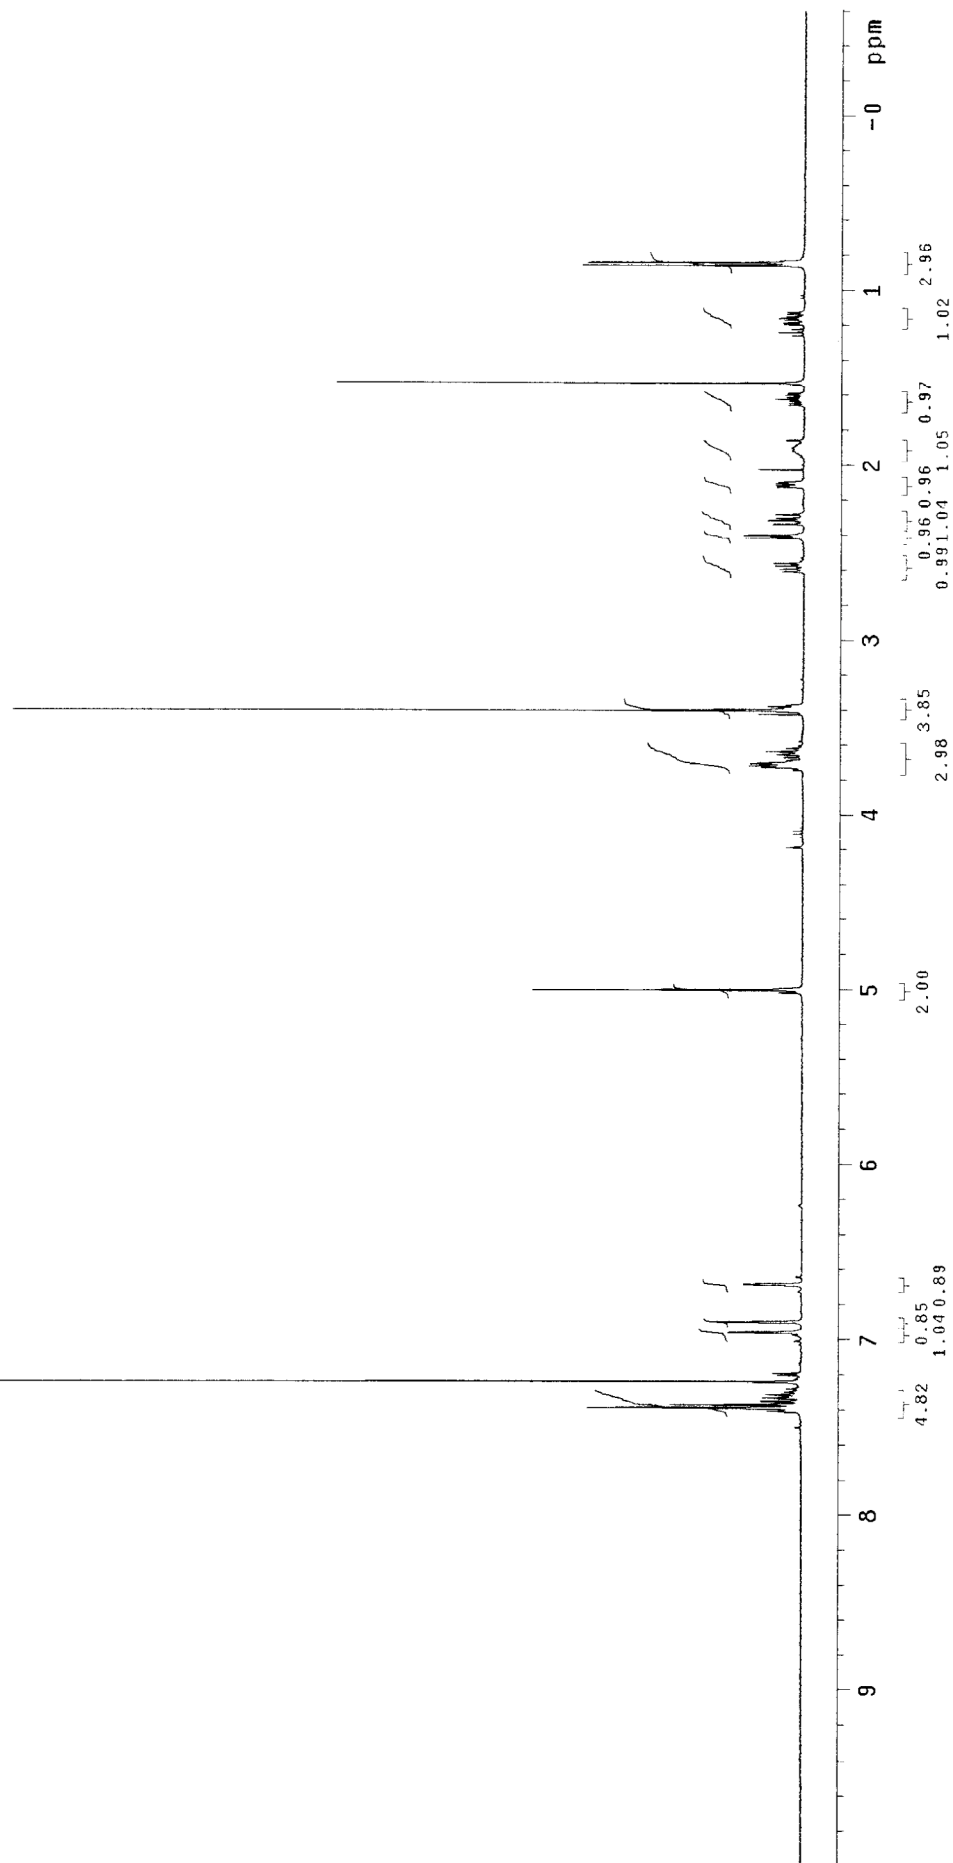

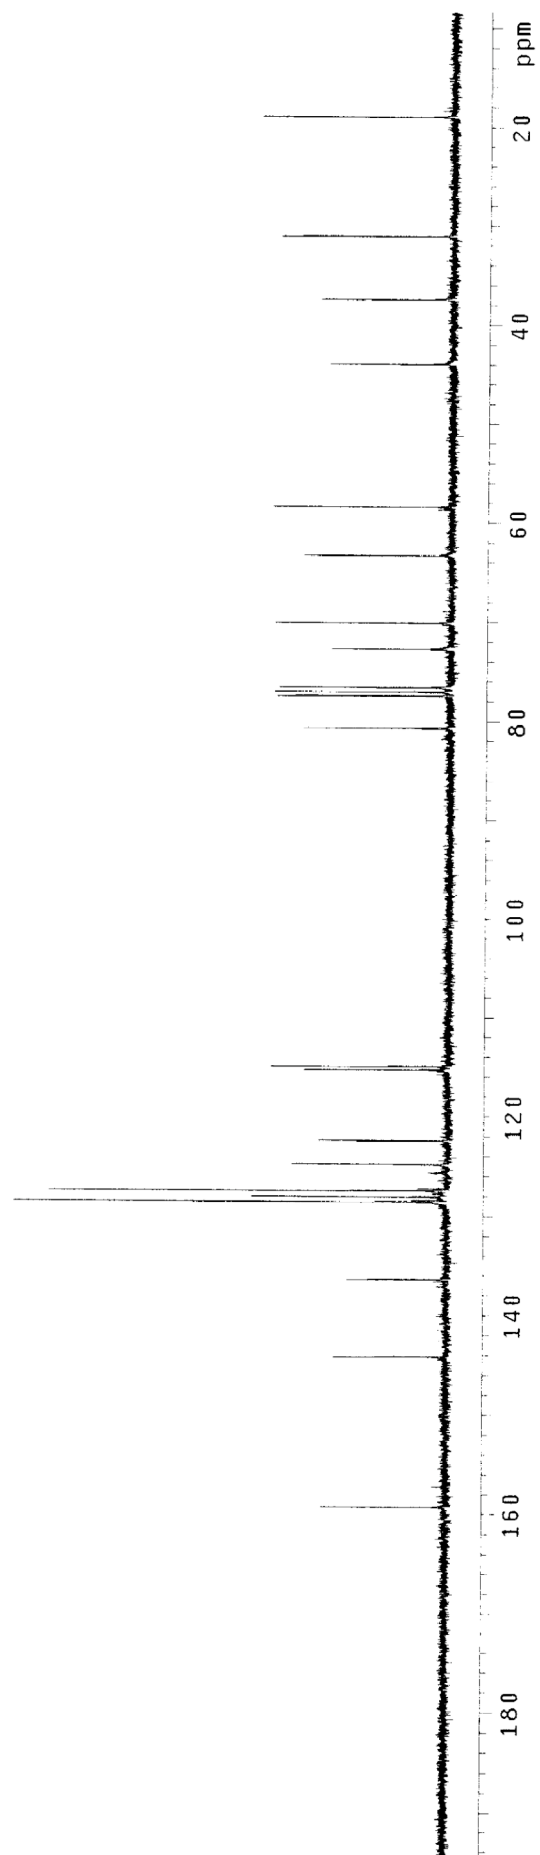

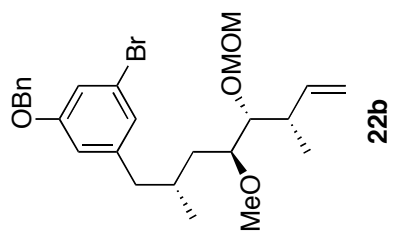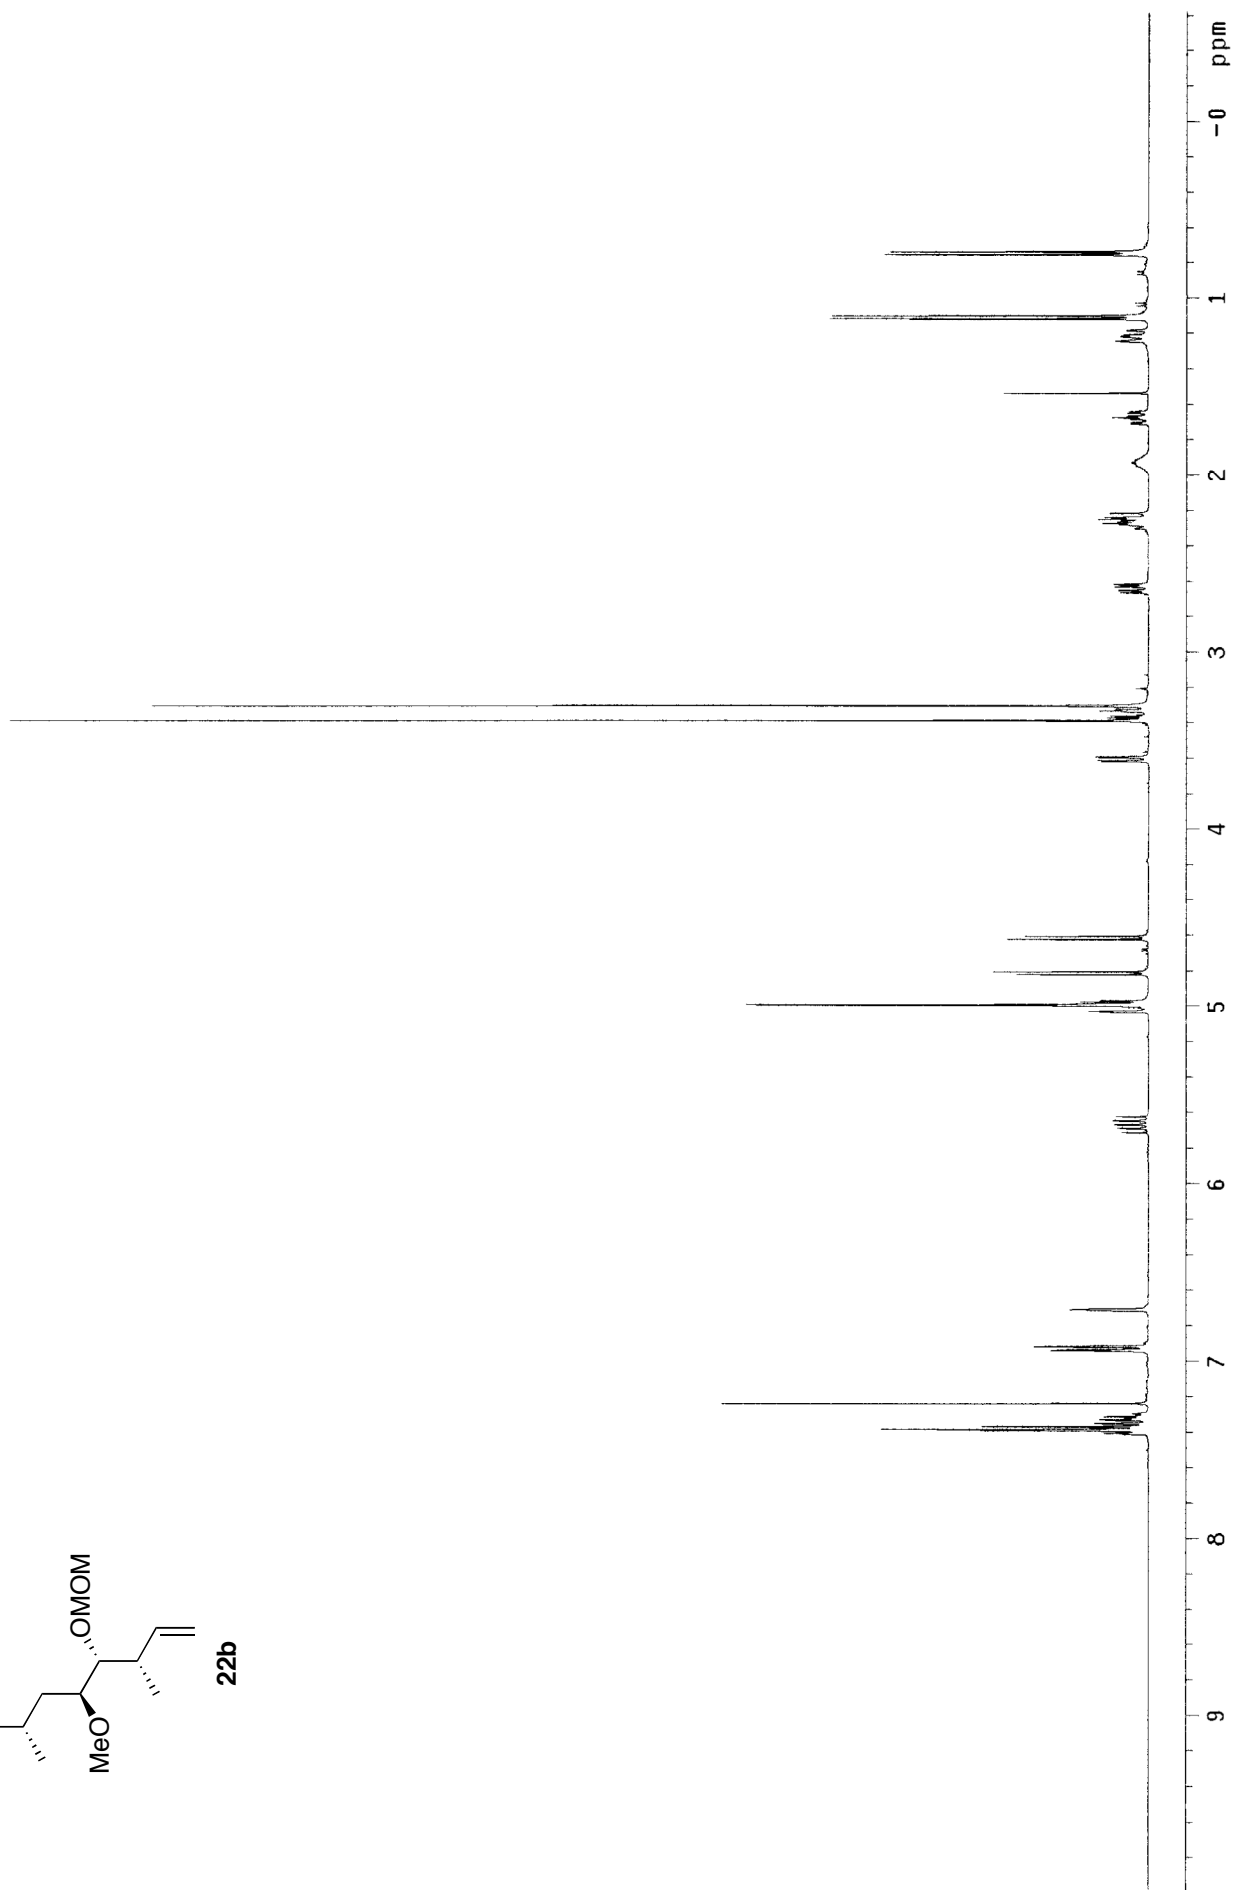

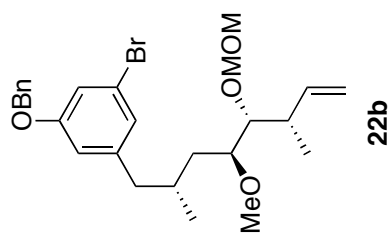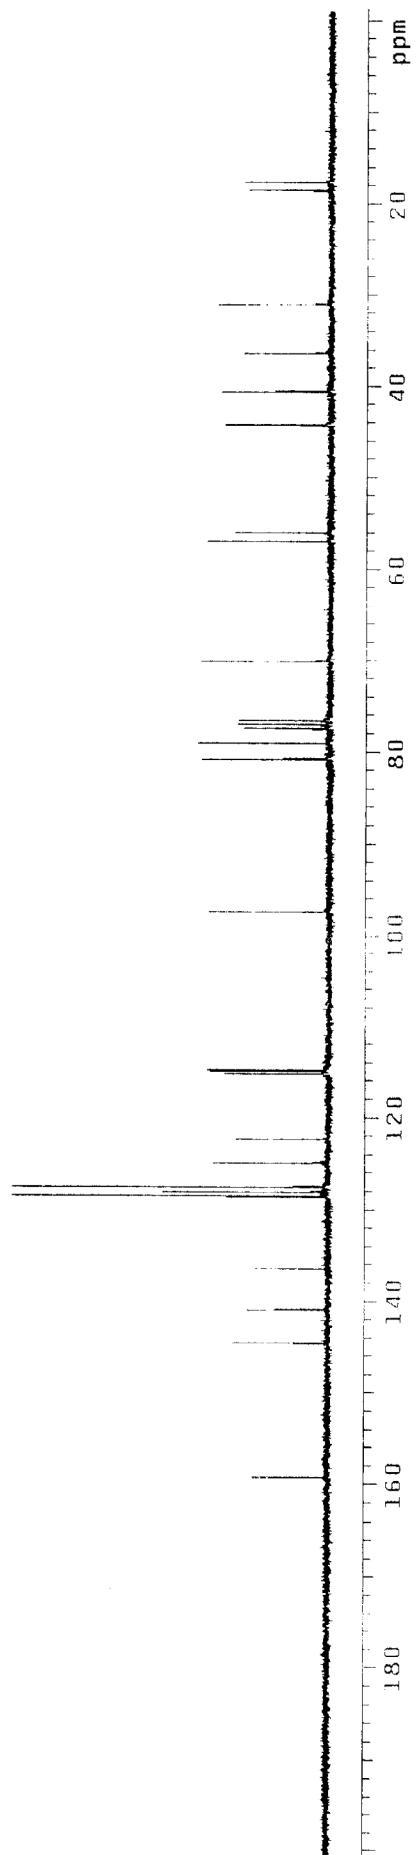



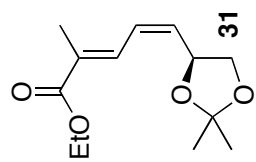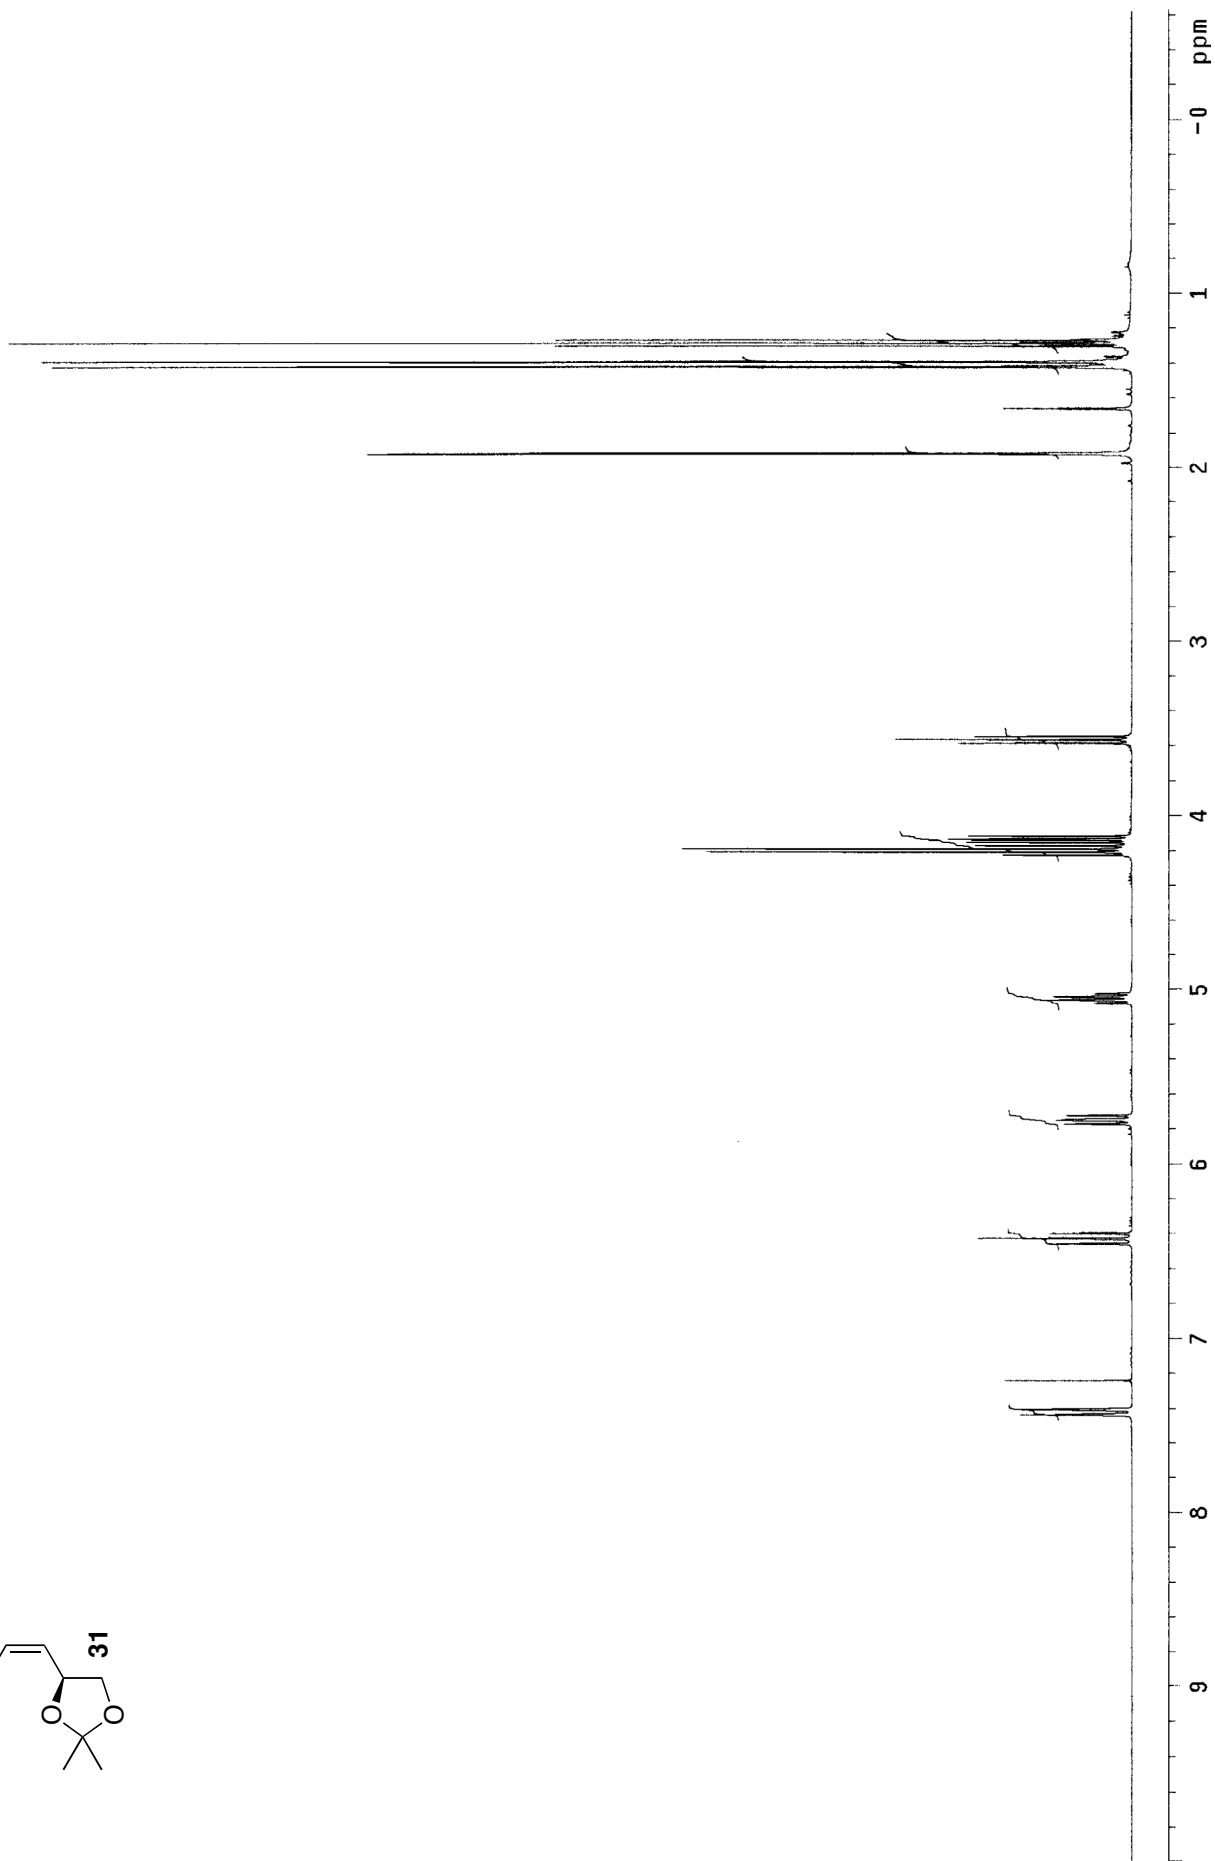

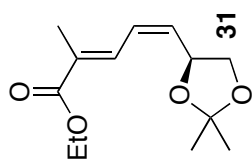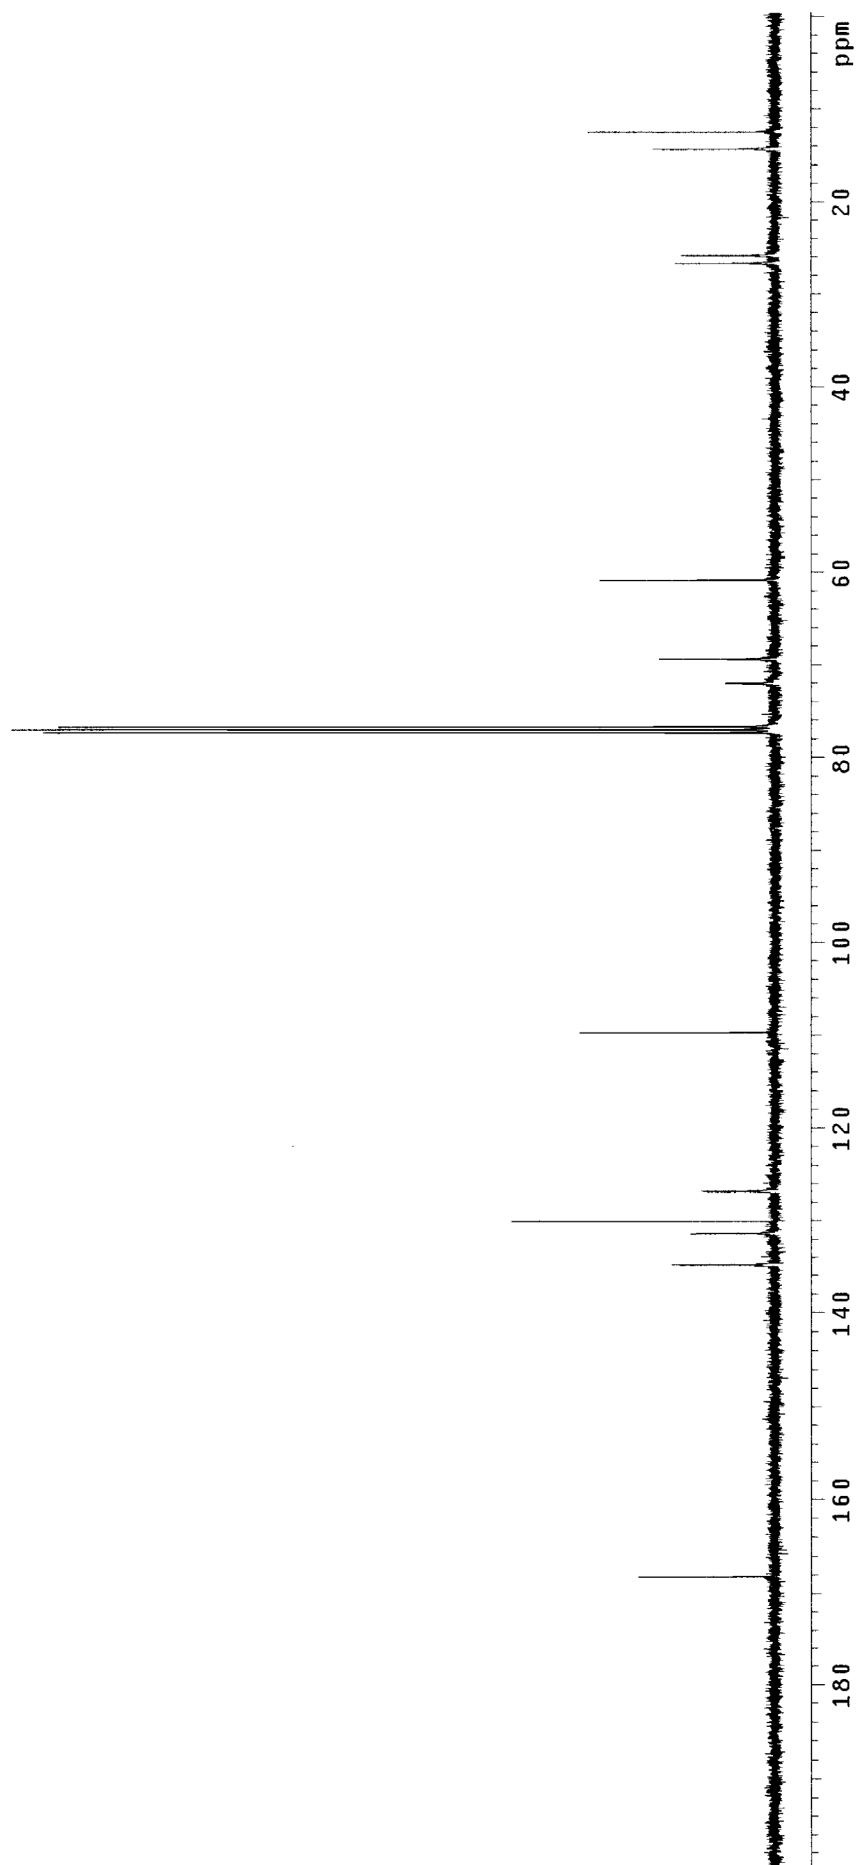

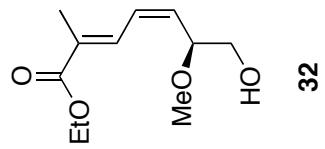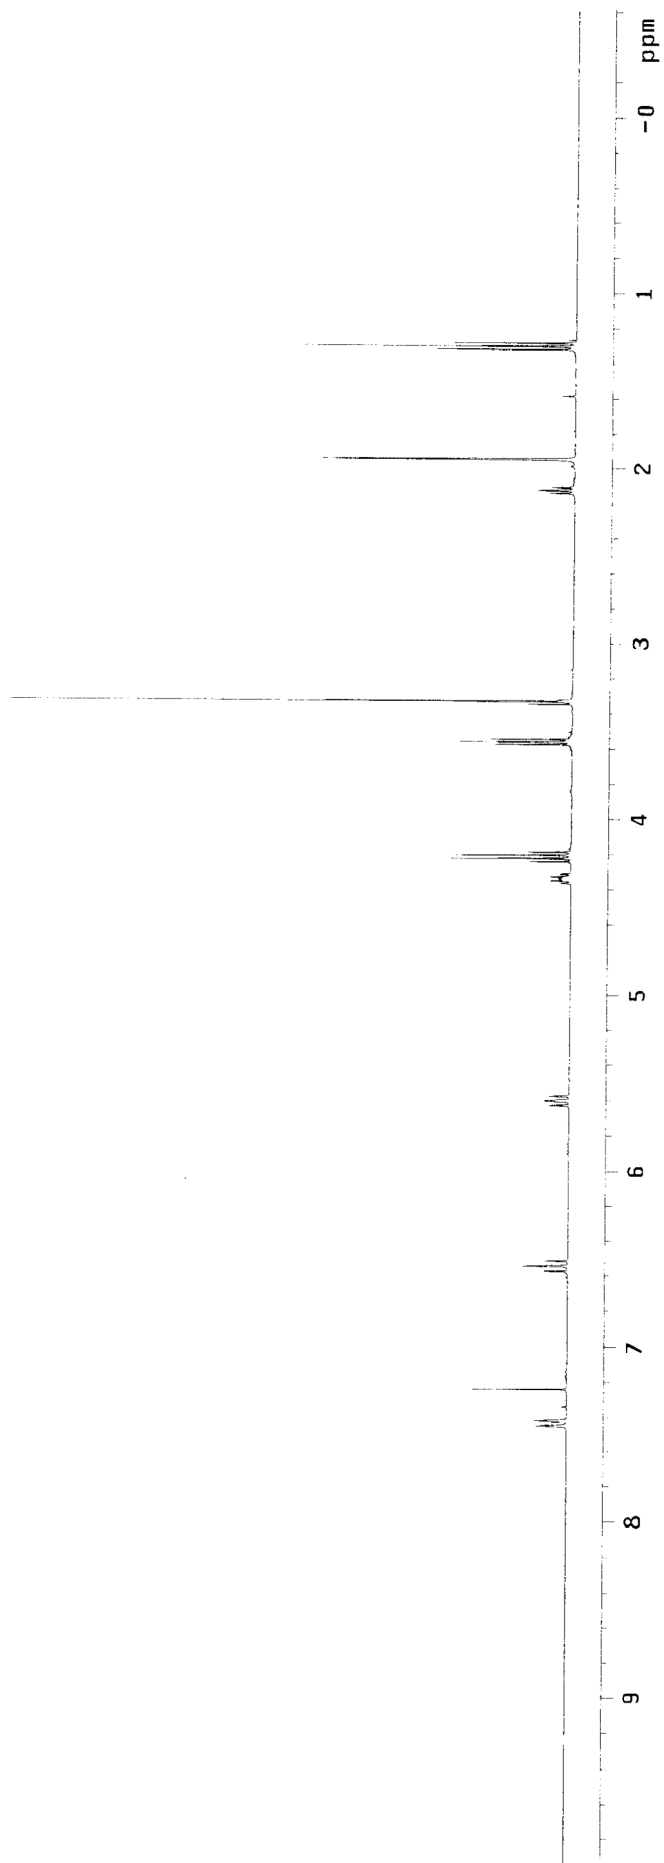

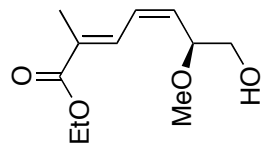

32

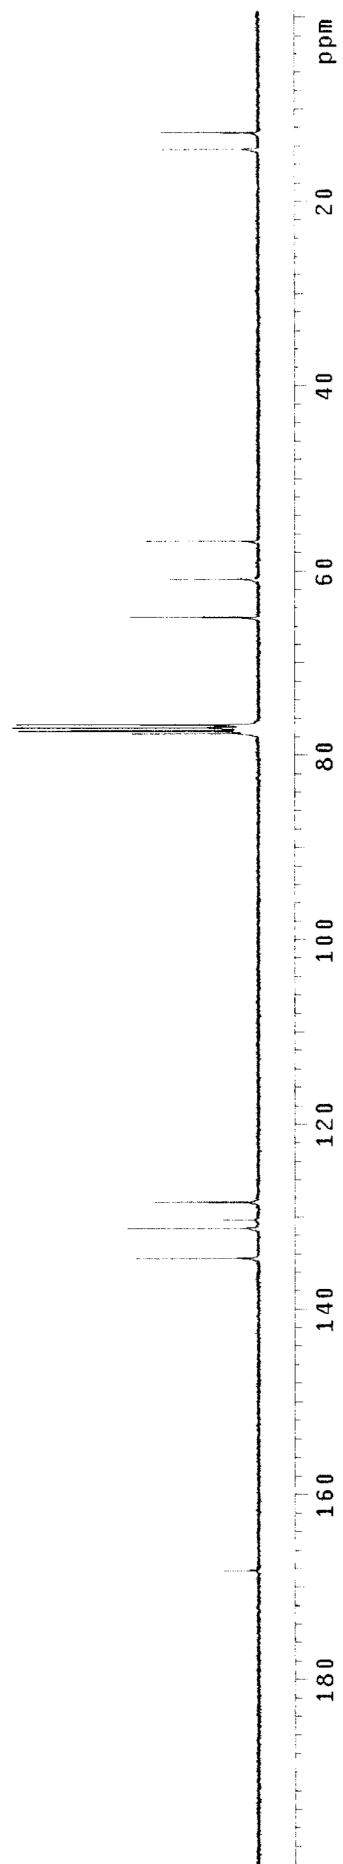



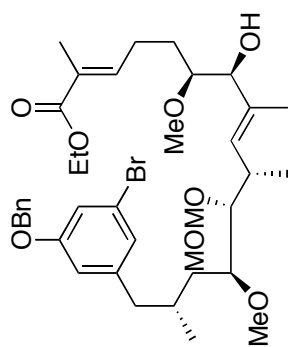

33b

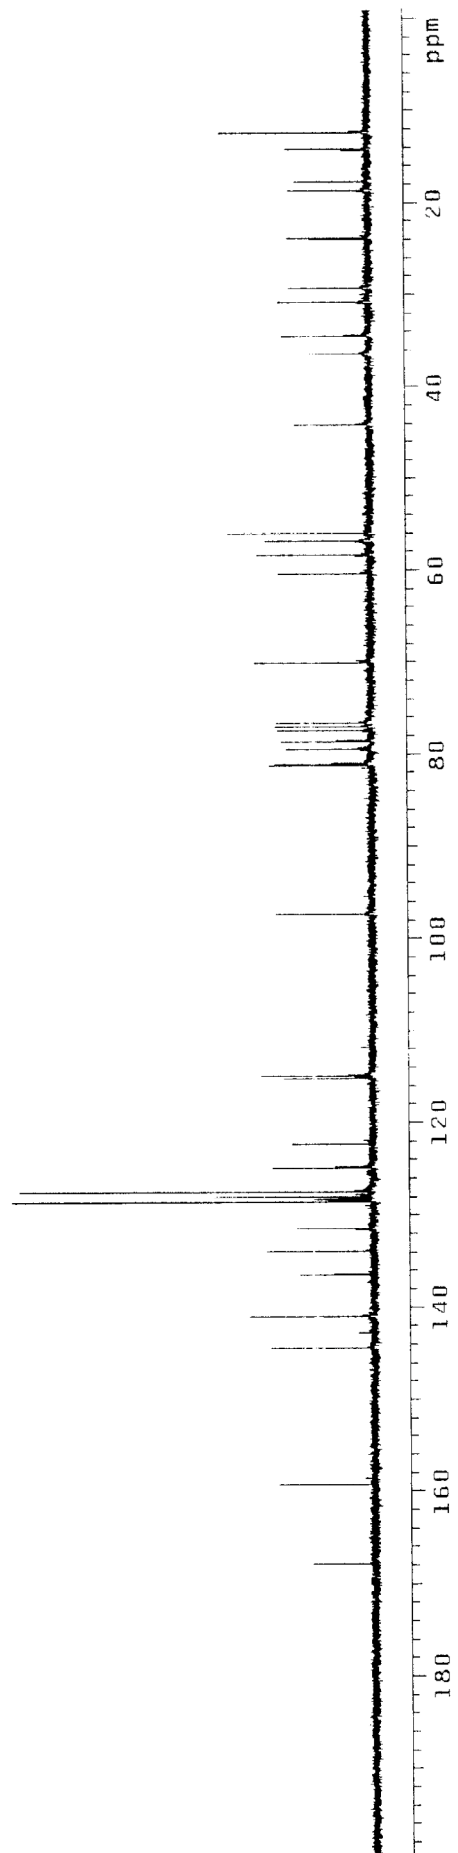



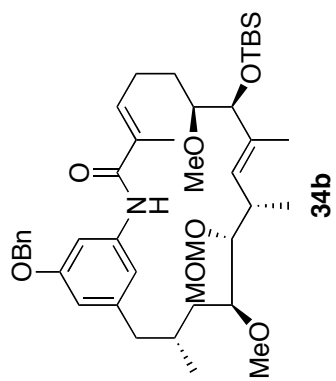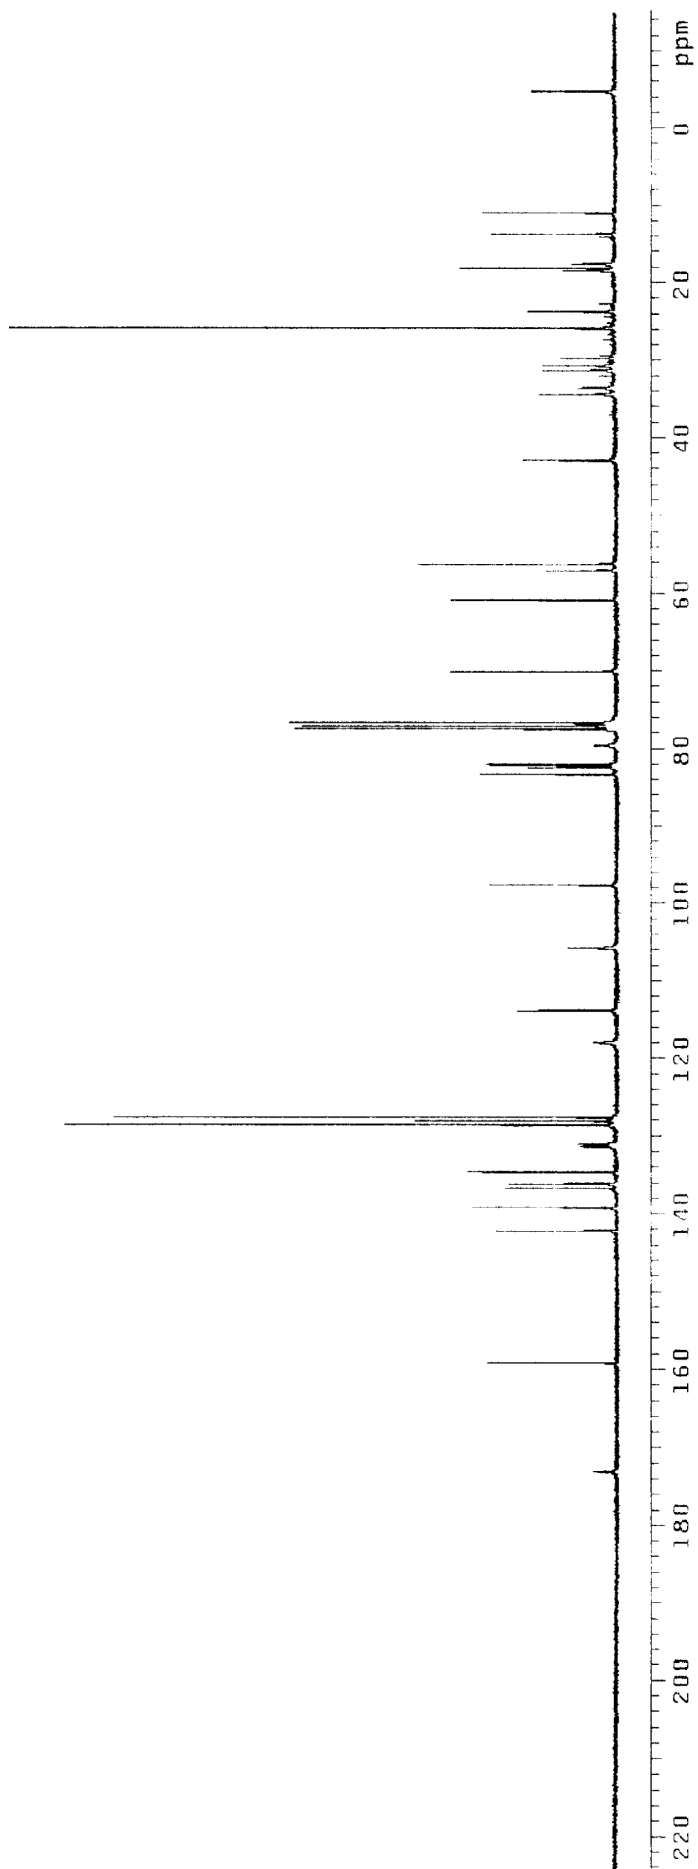



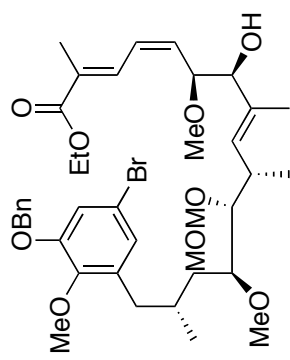

35

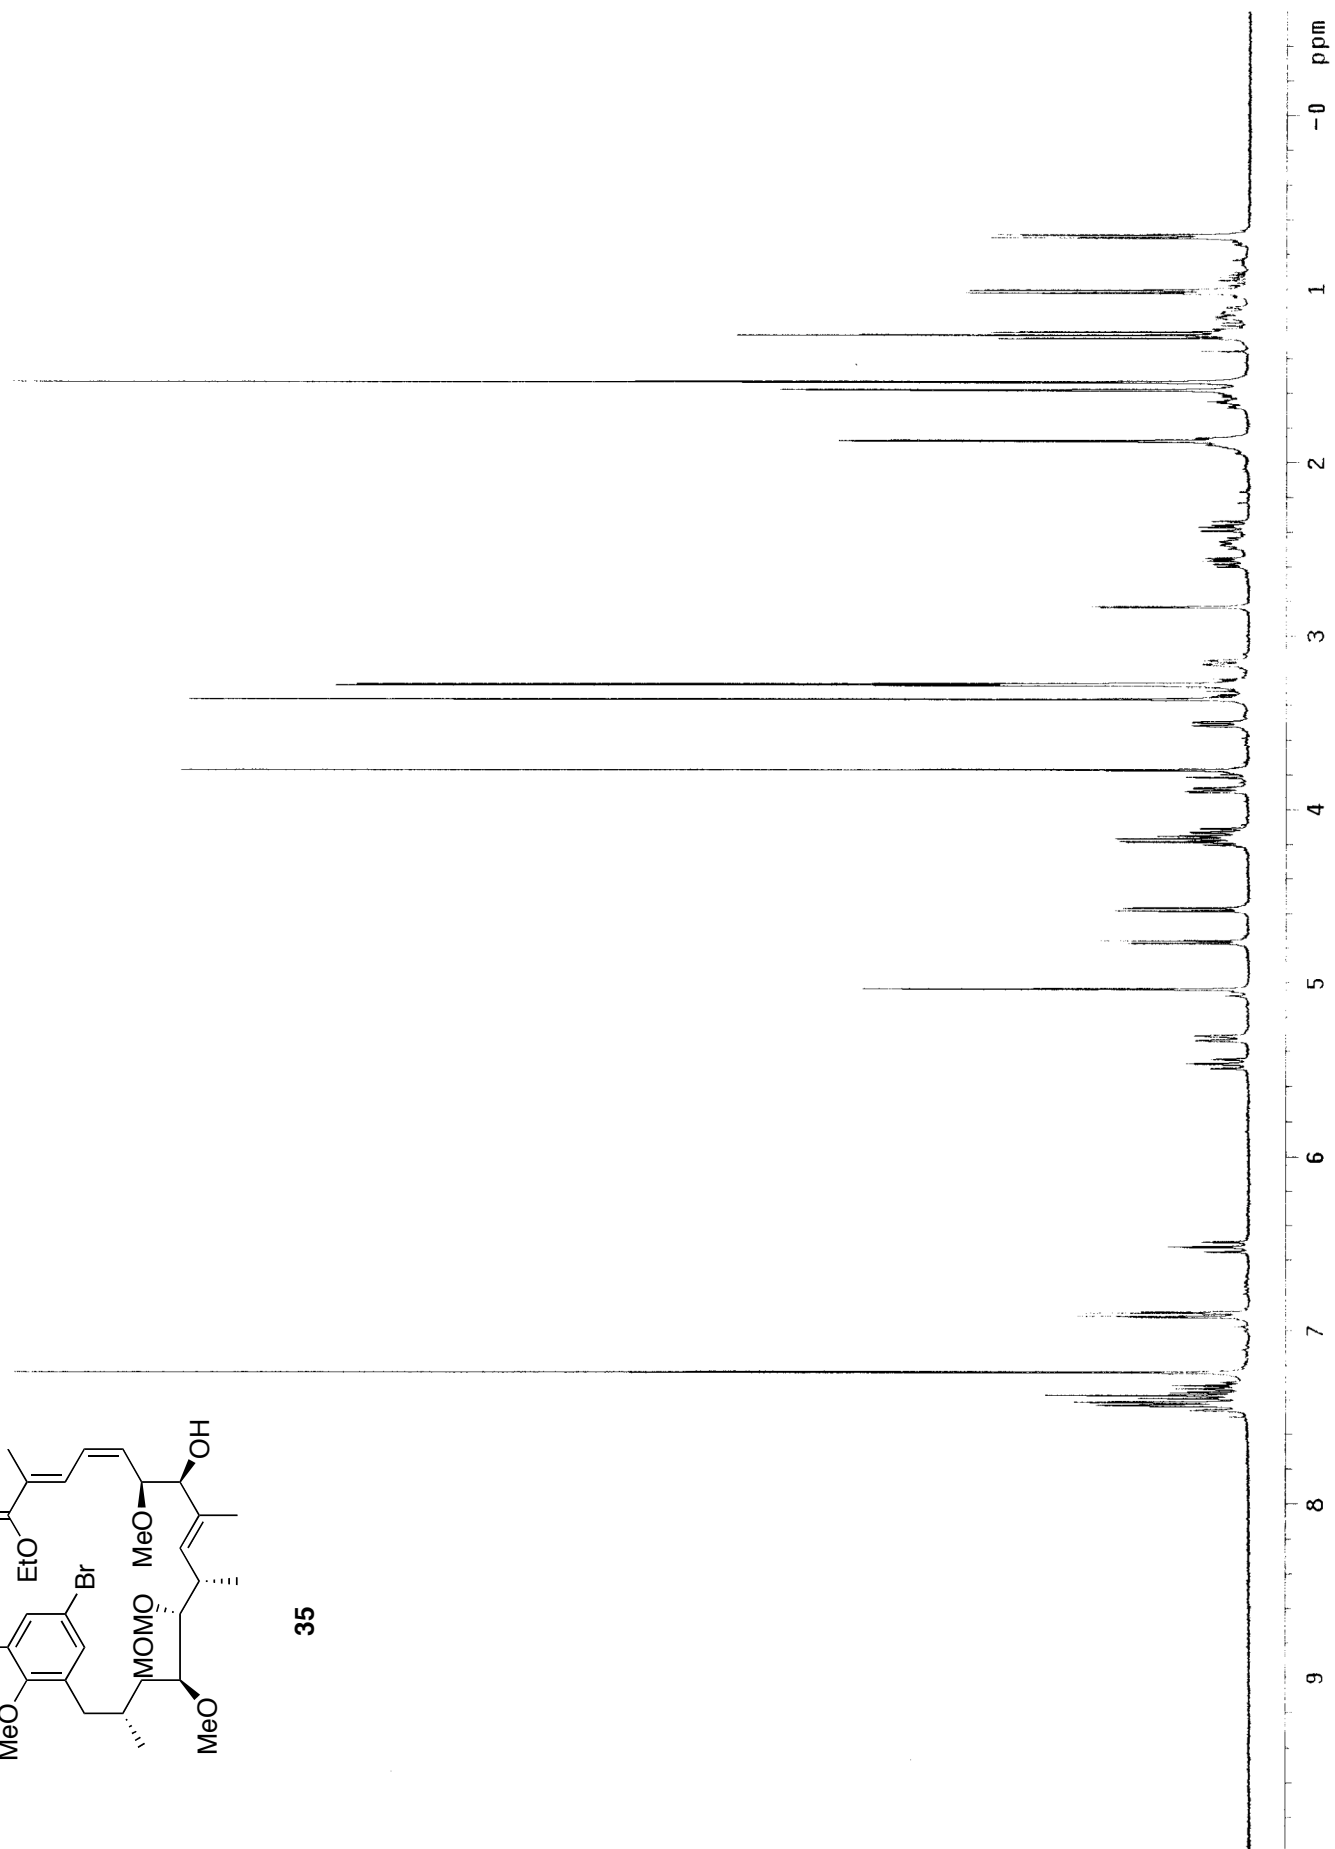

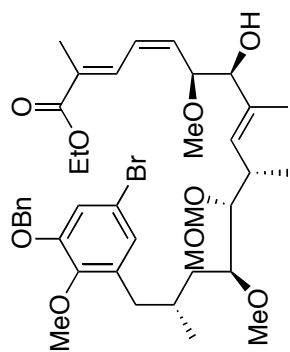

35

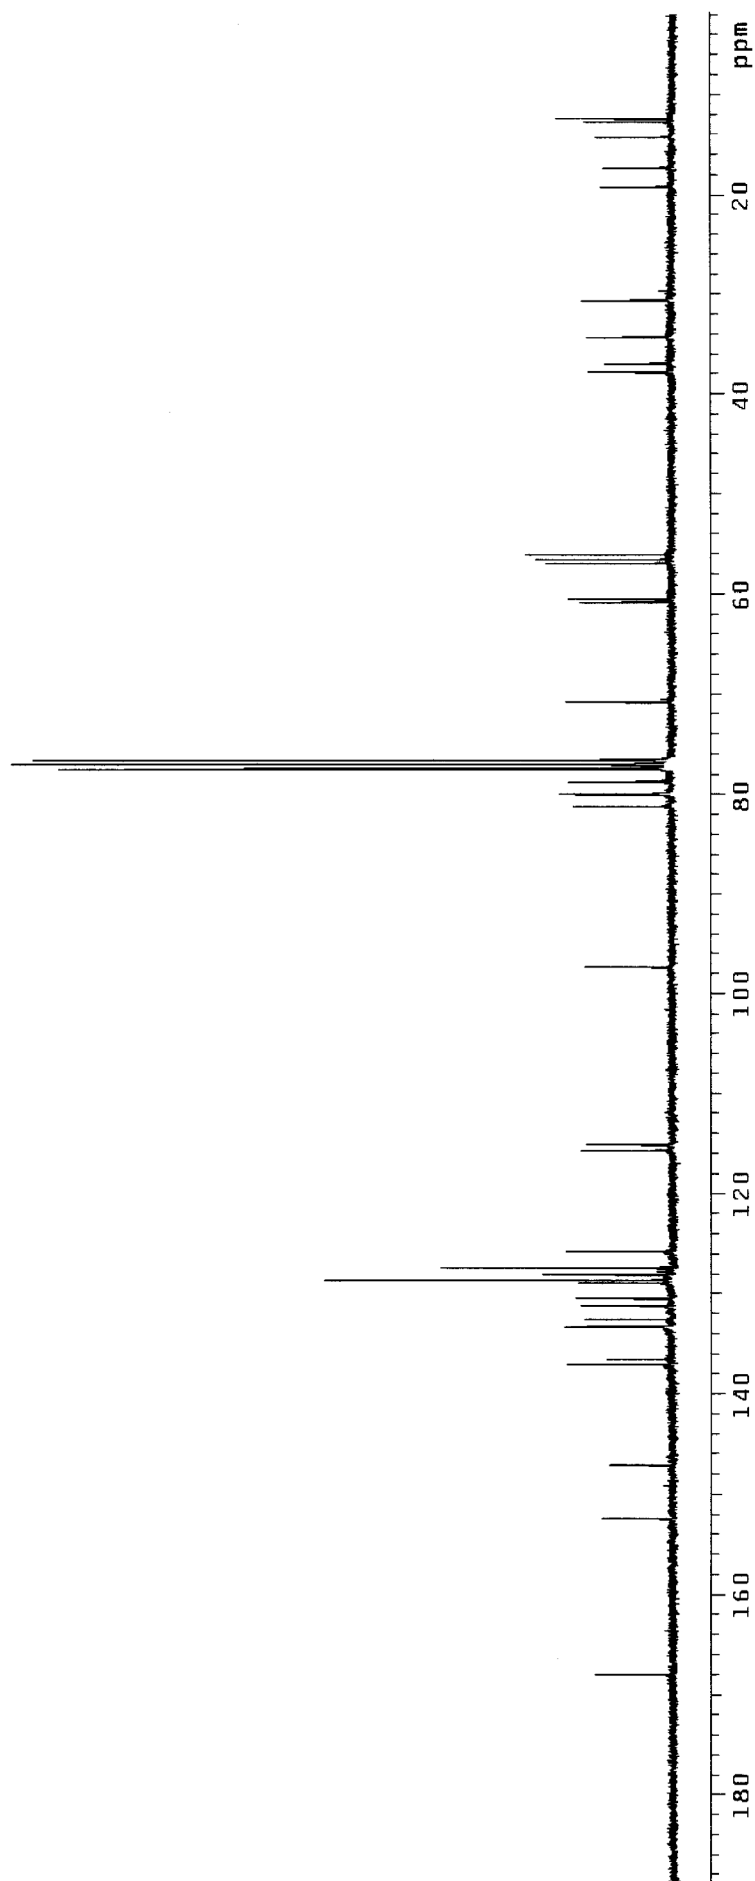

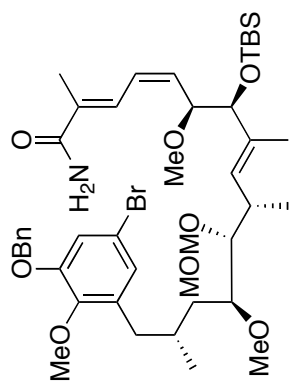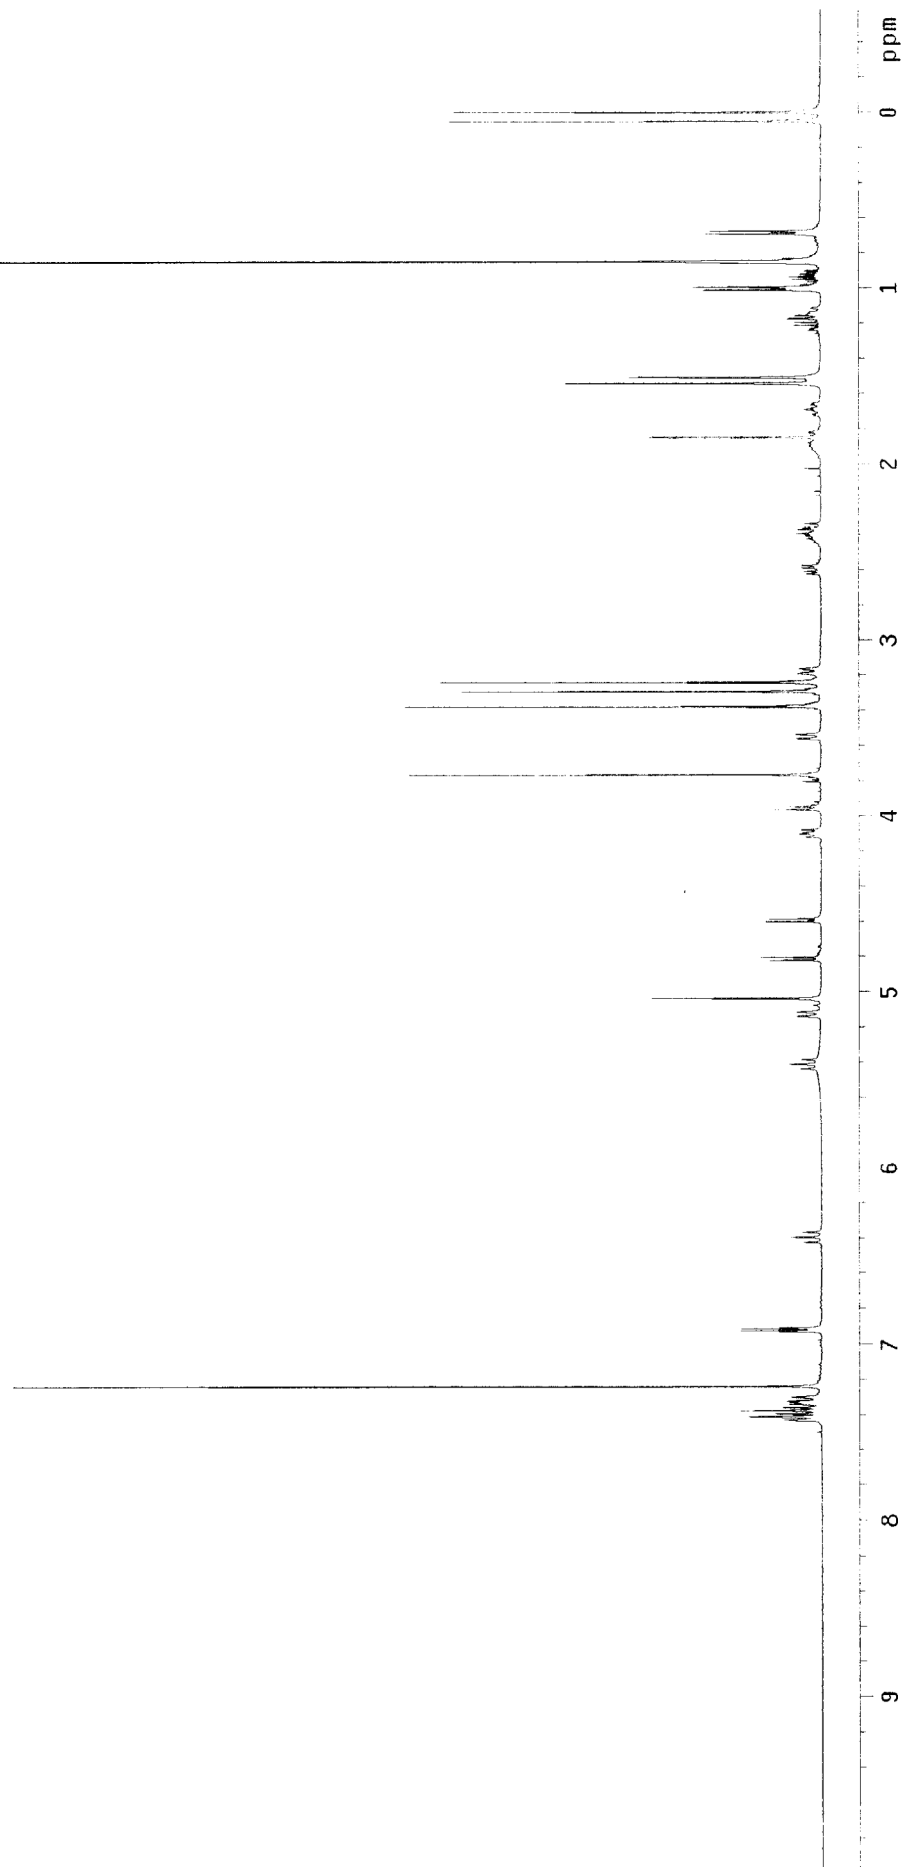

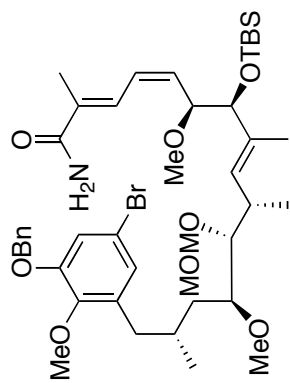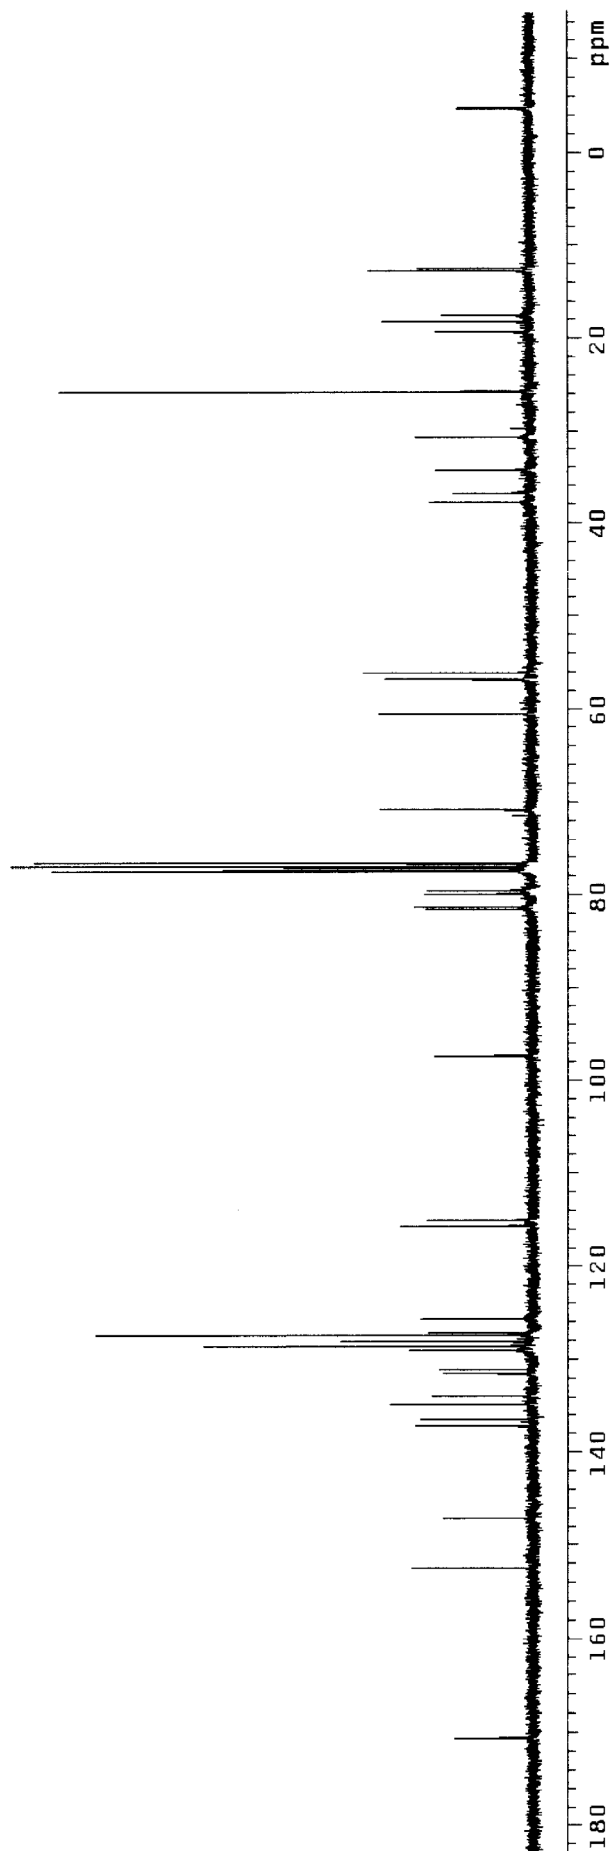

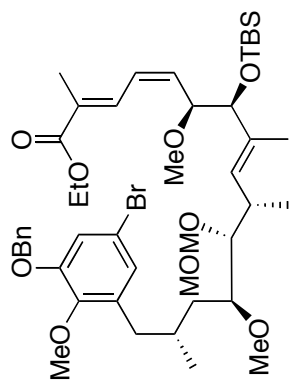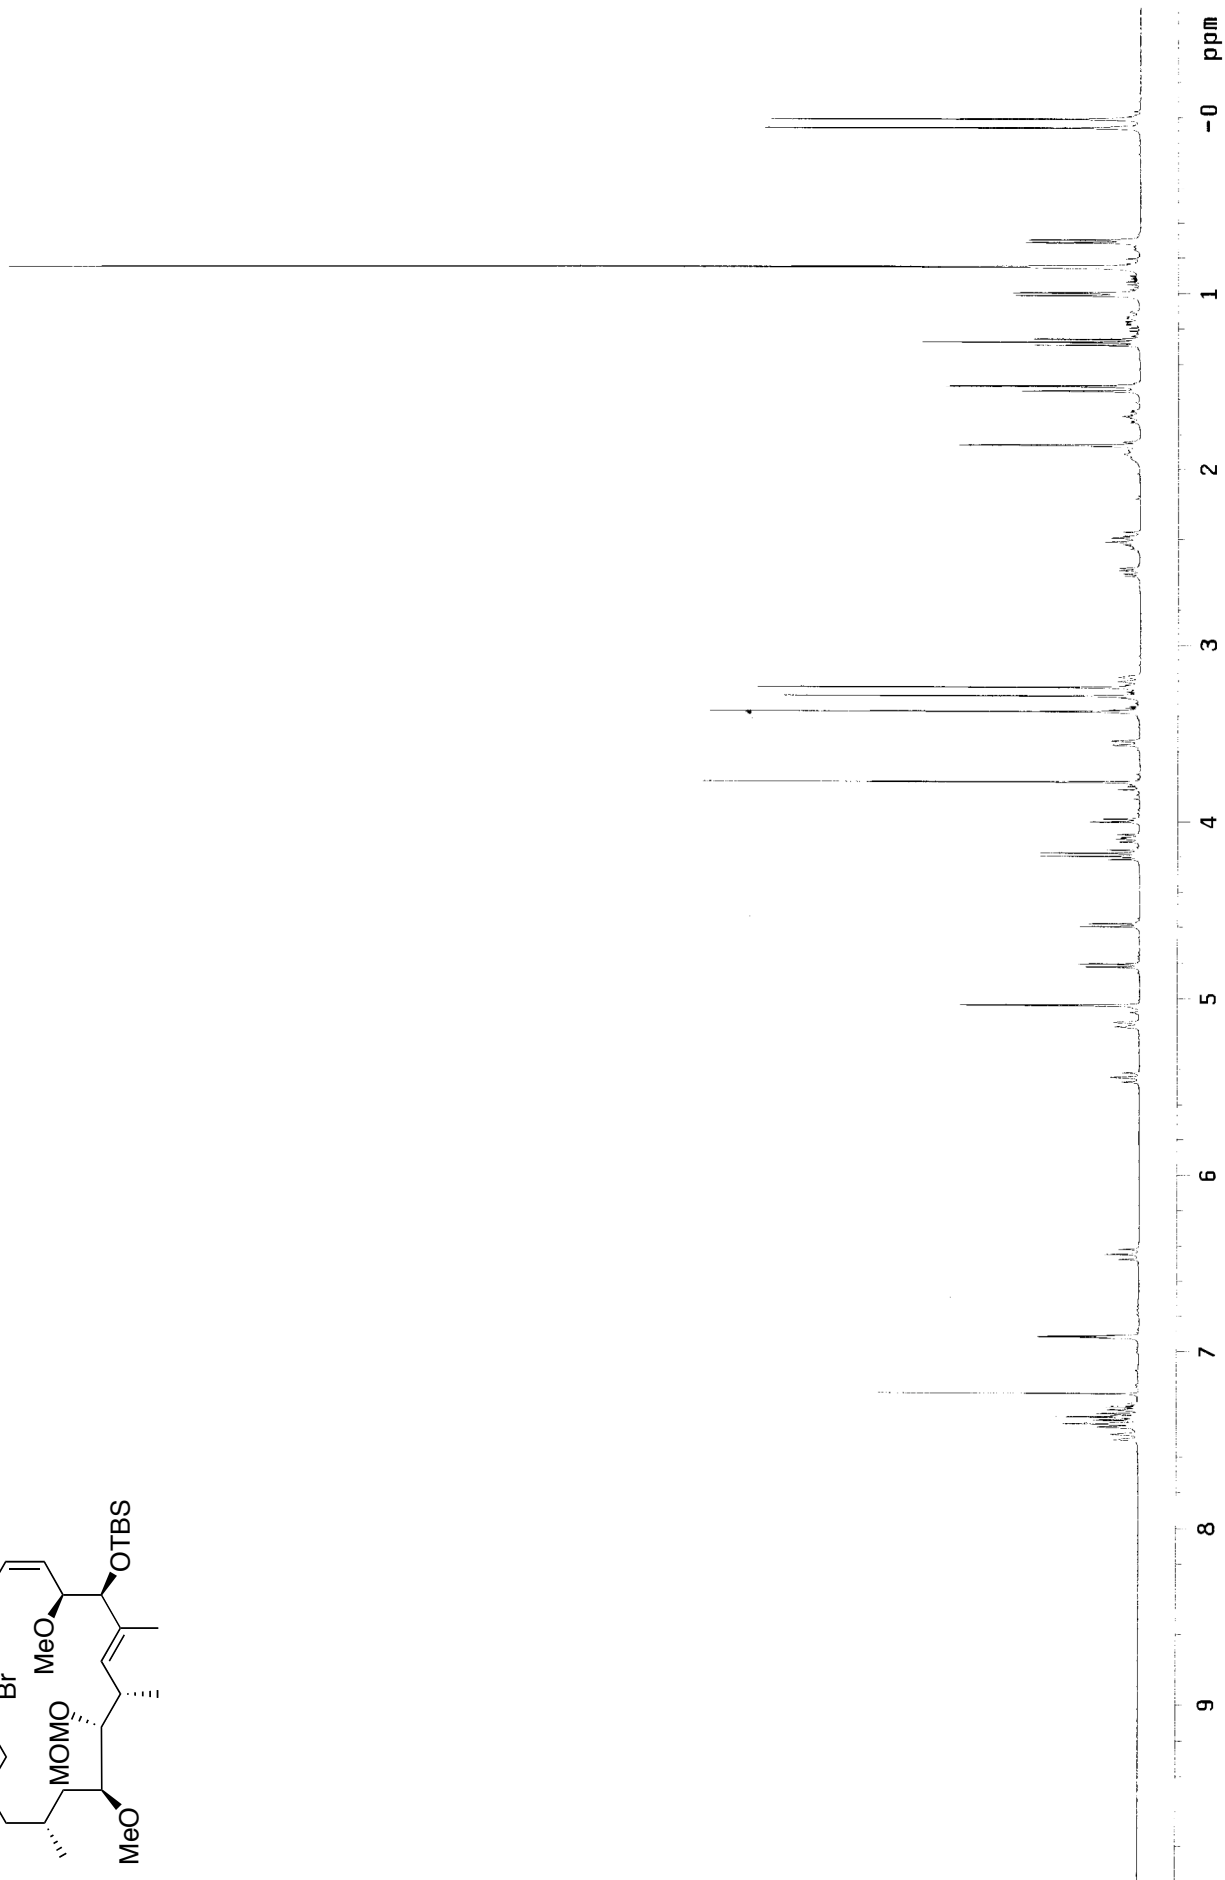

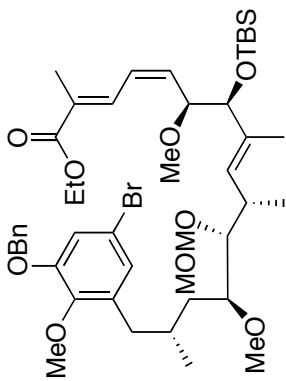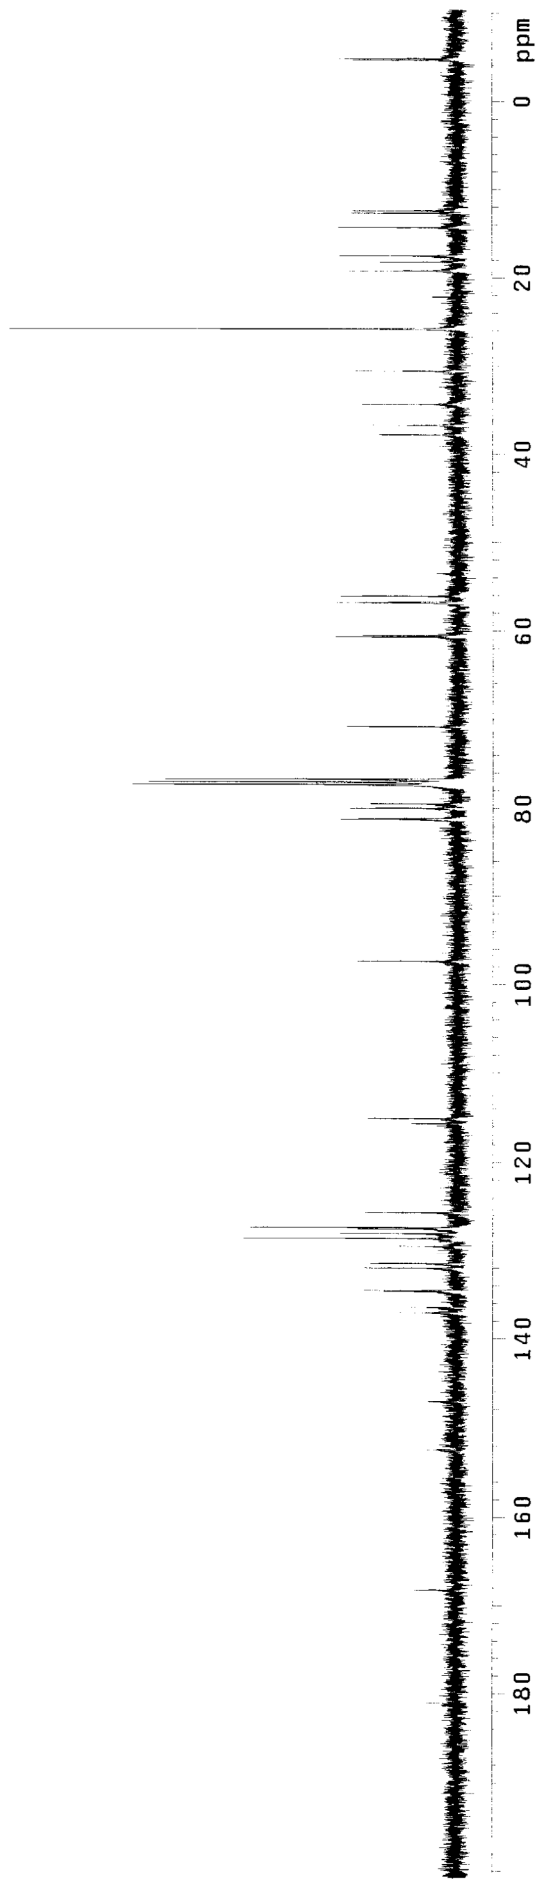

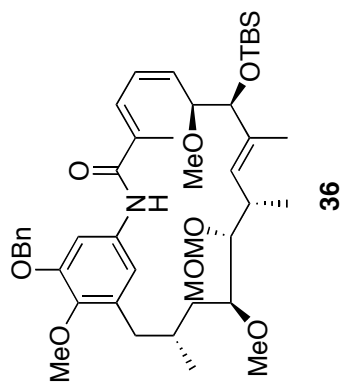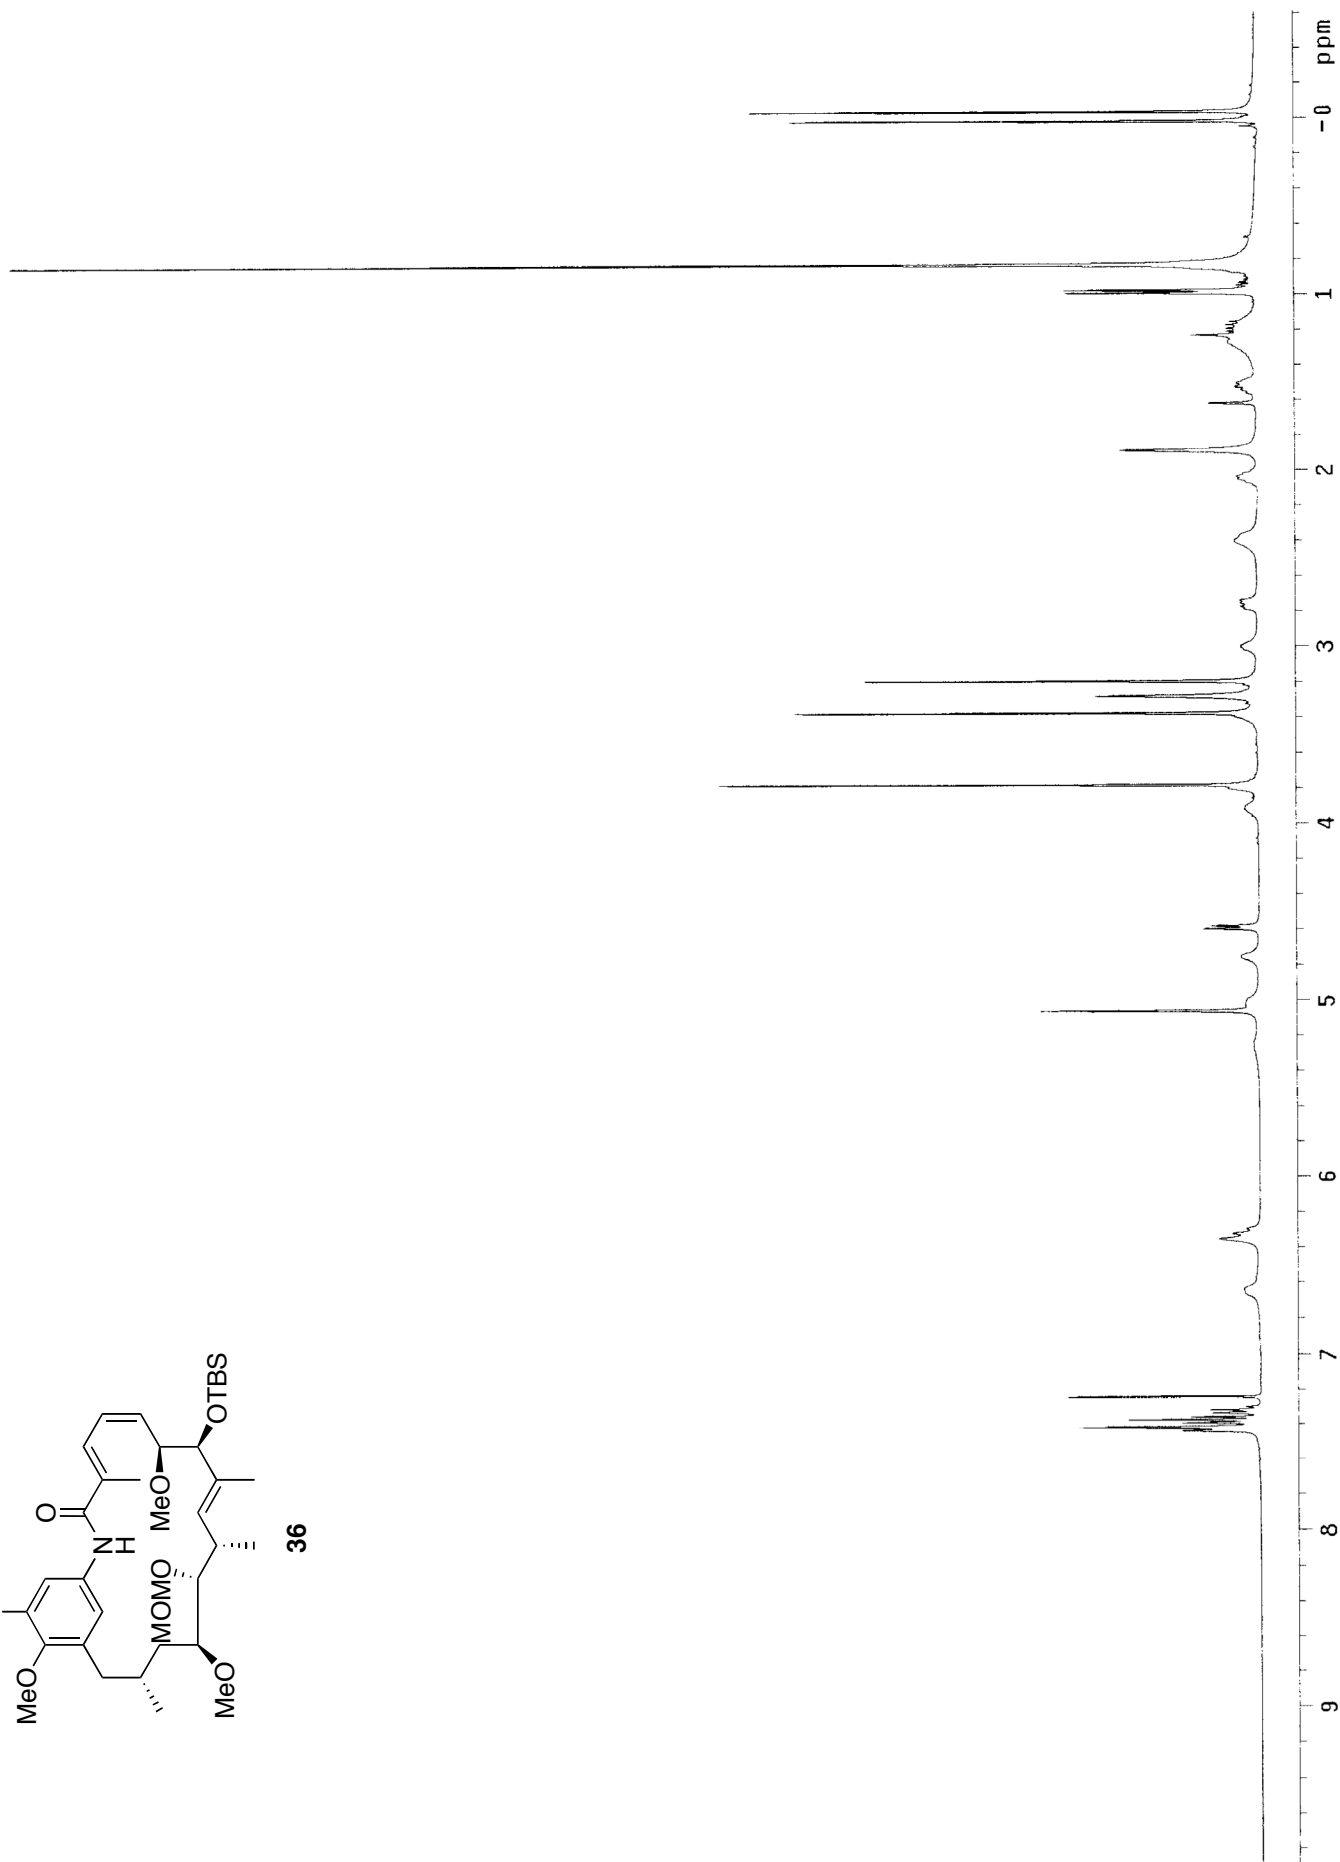

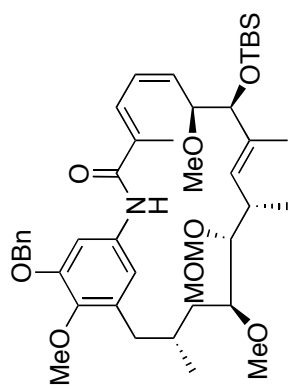

36

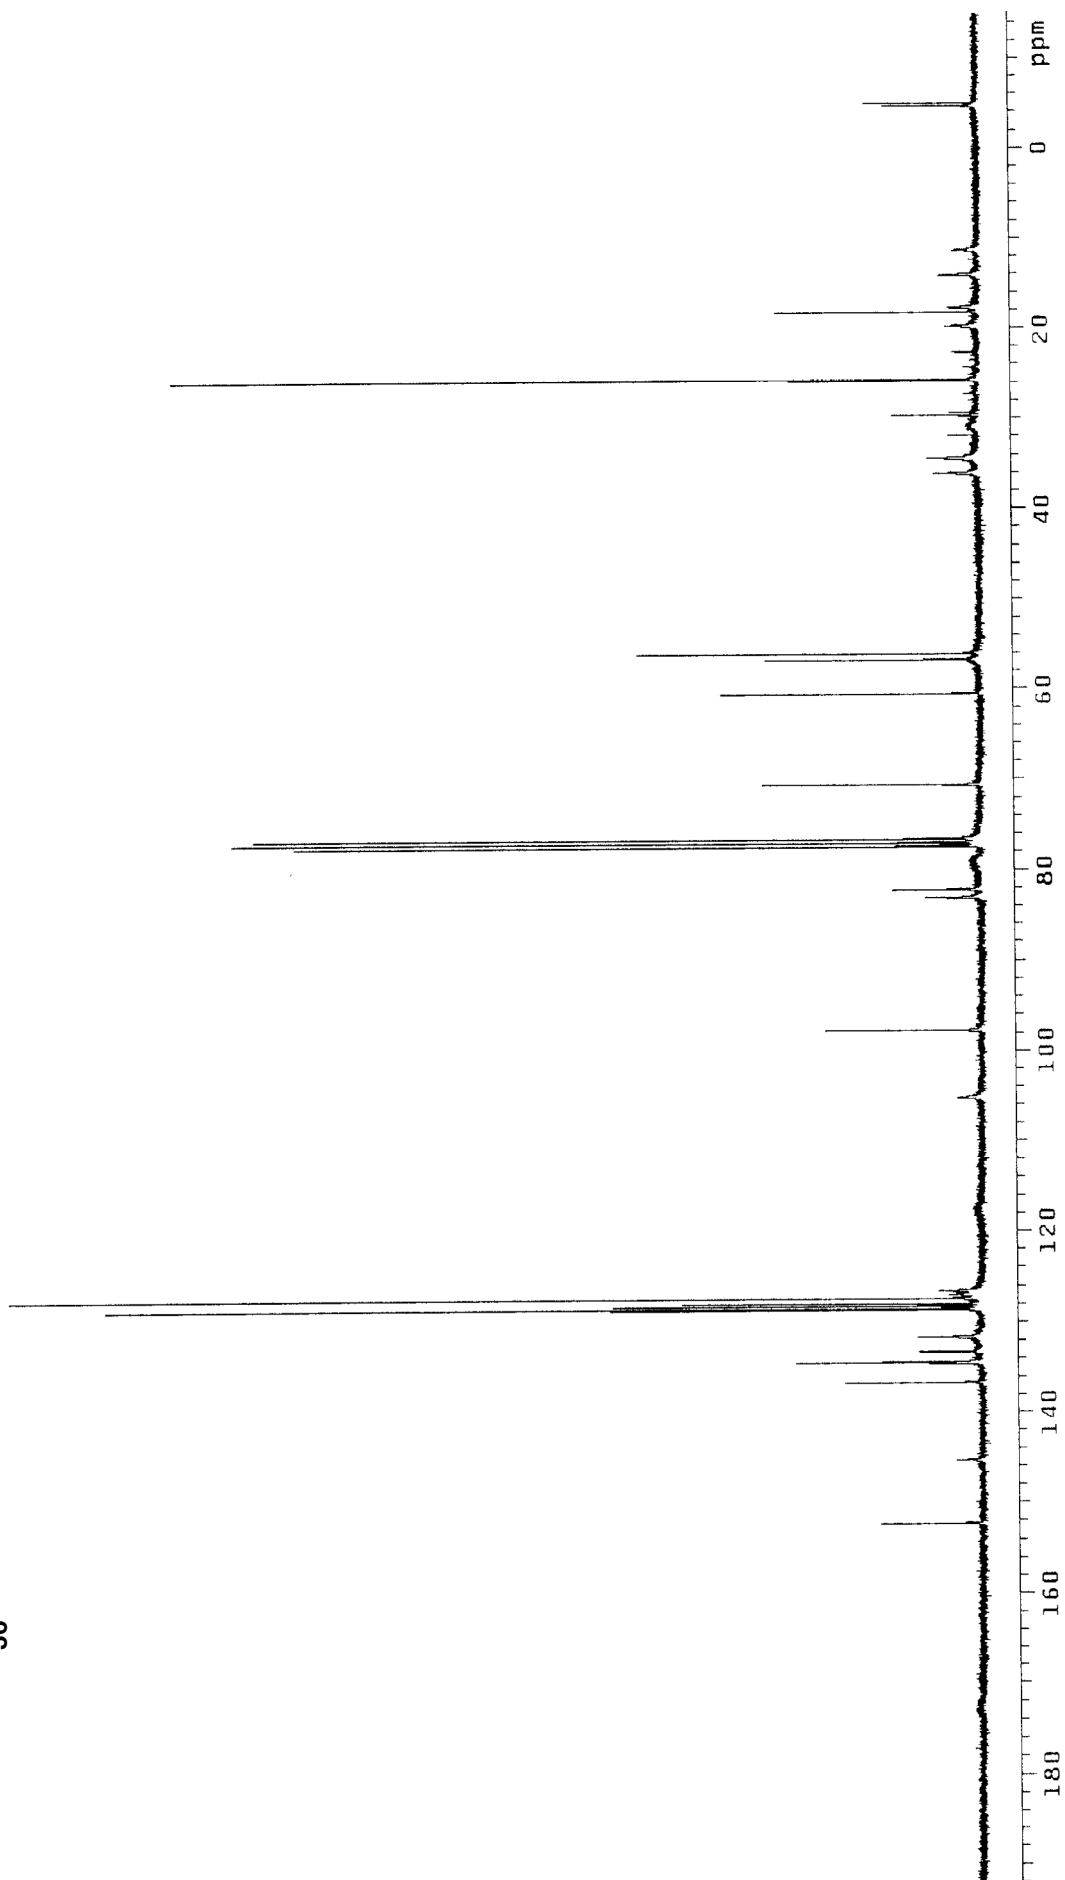



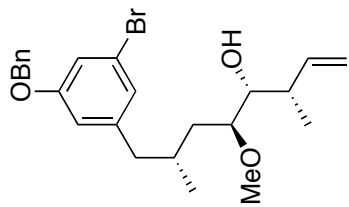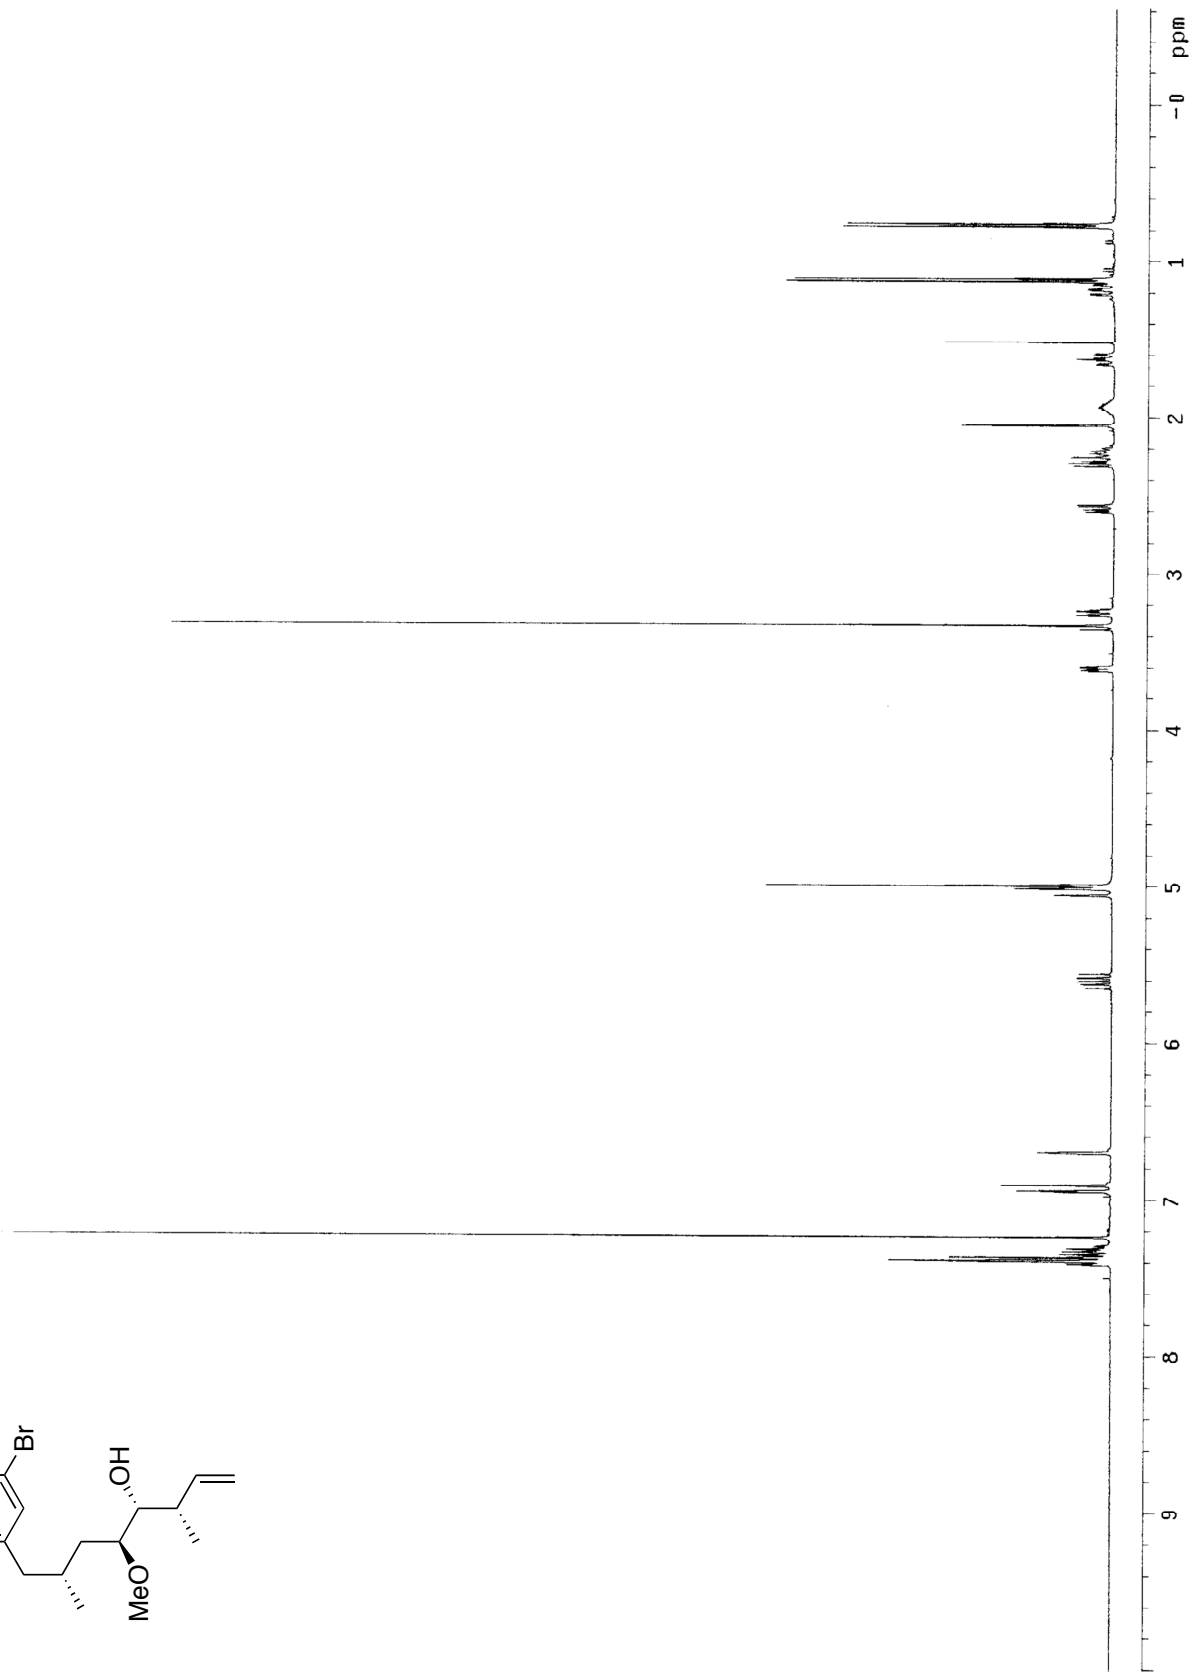

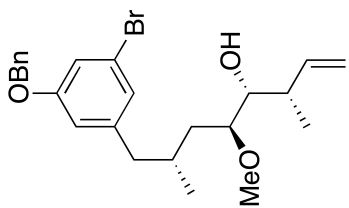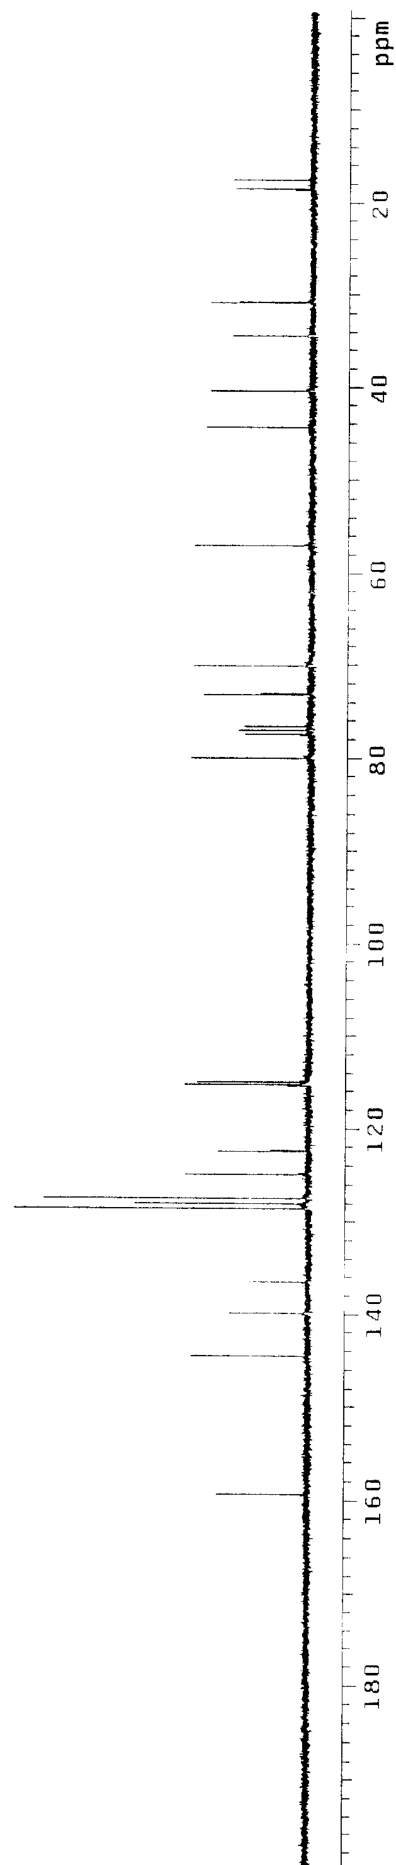

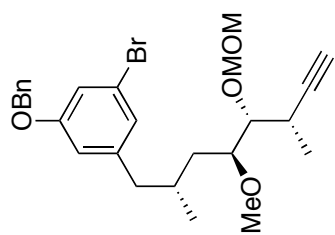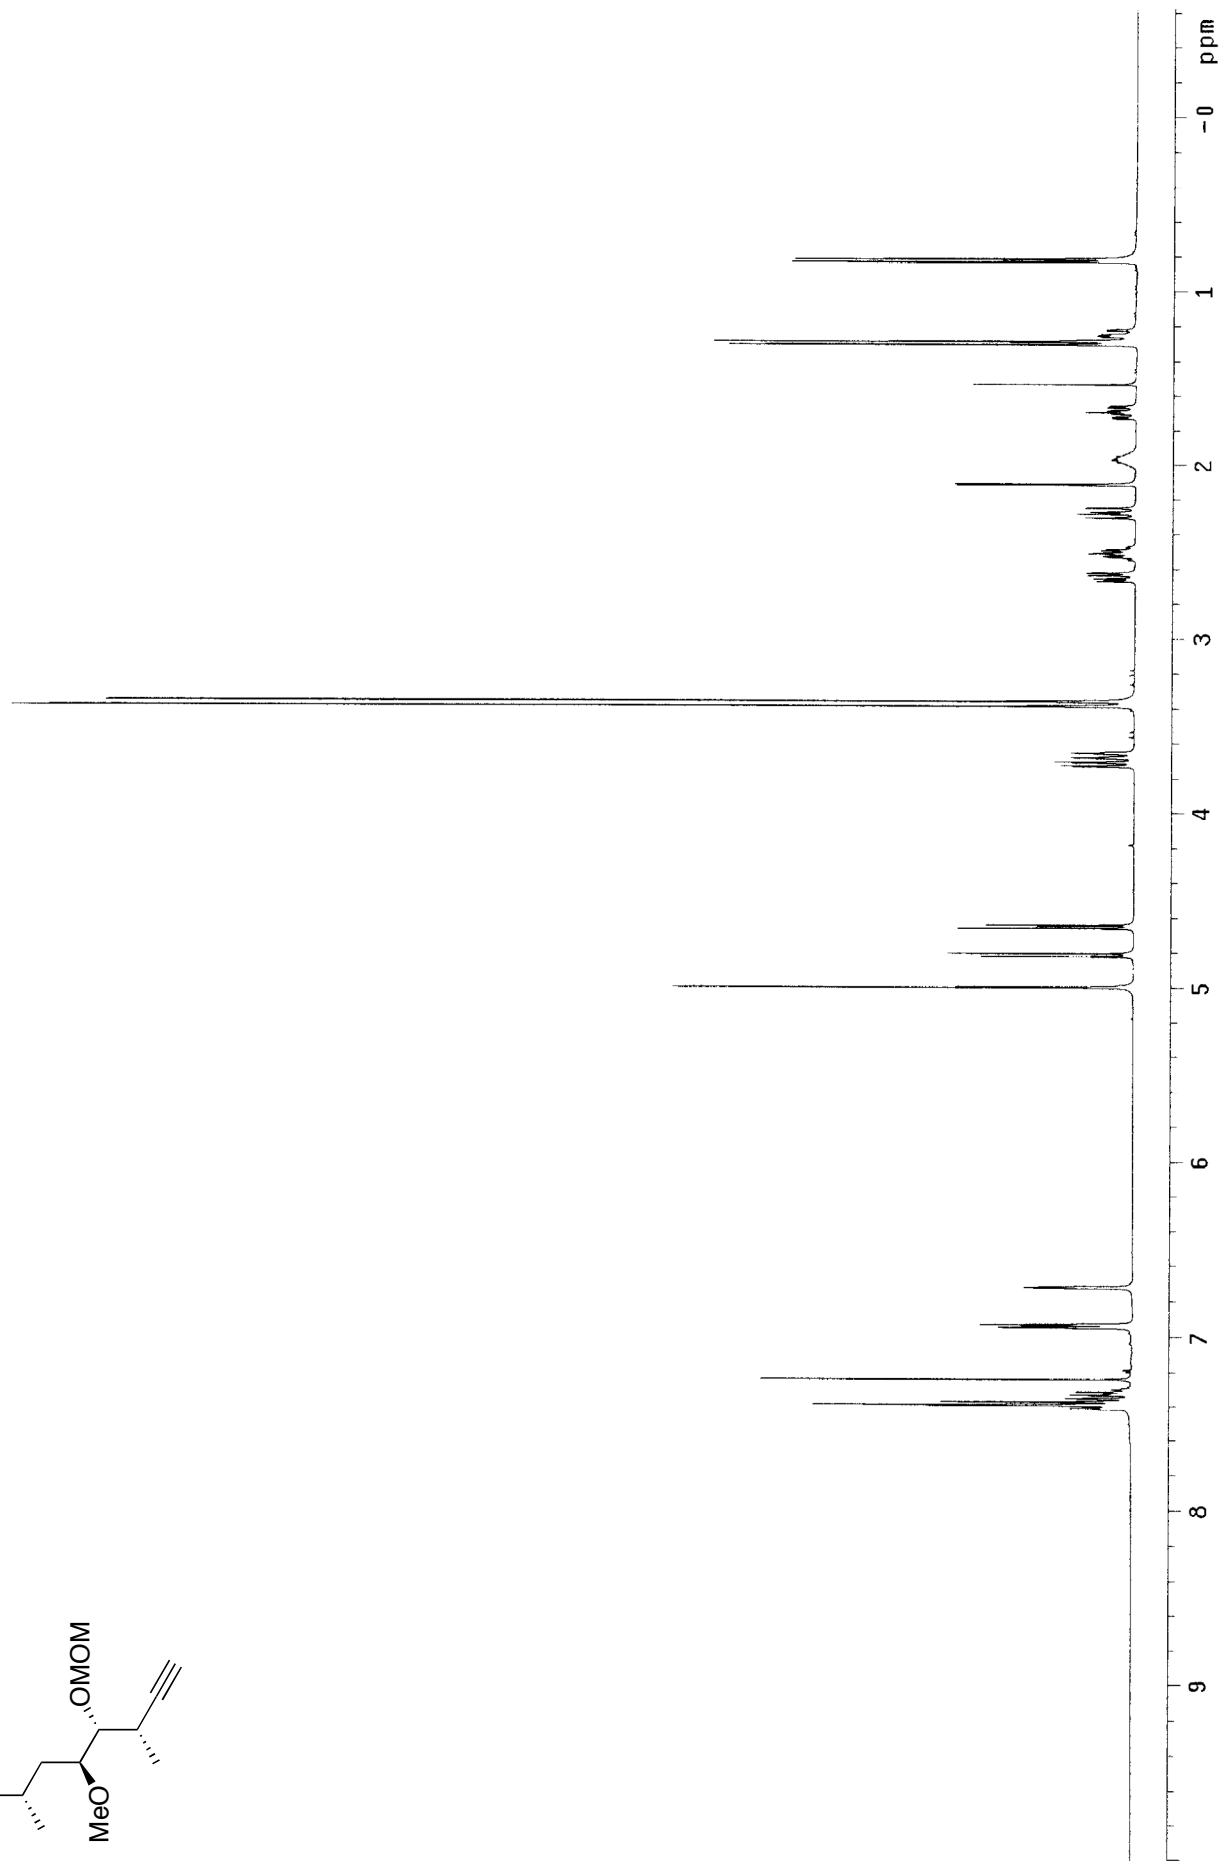

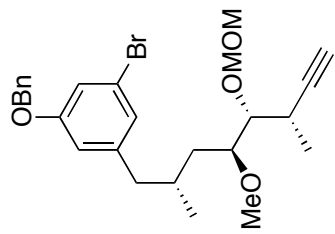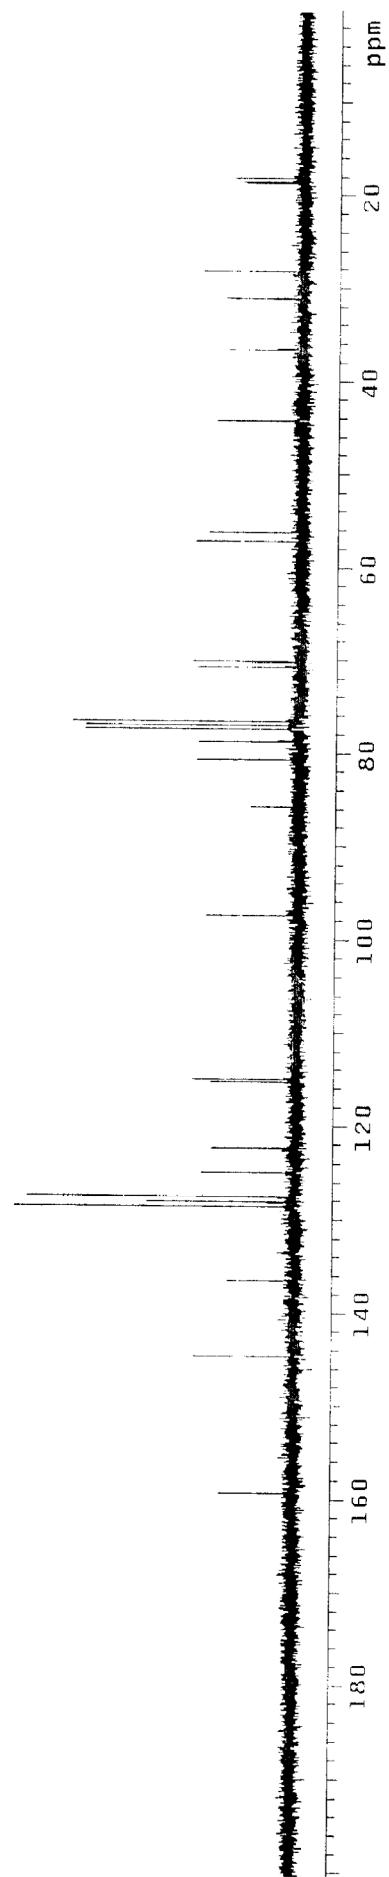

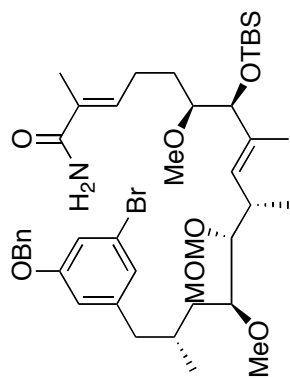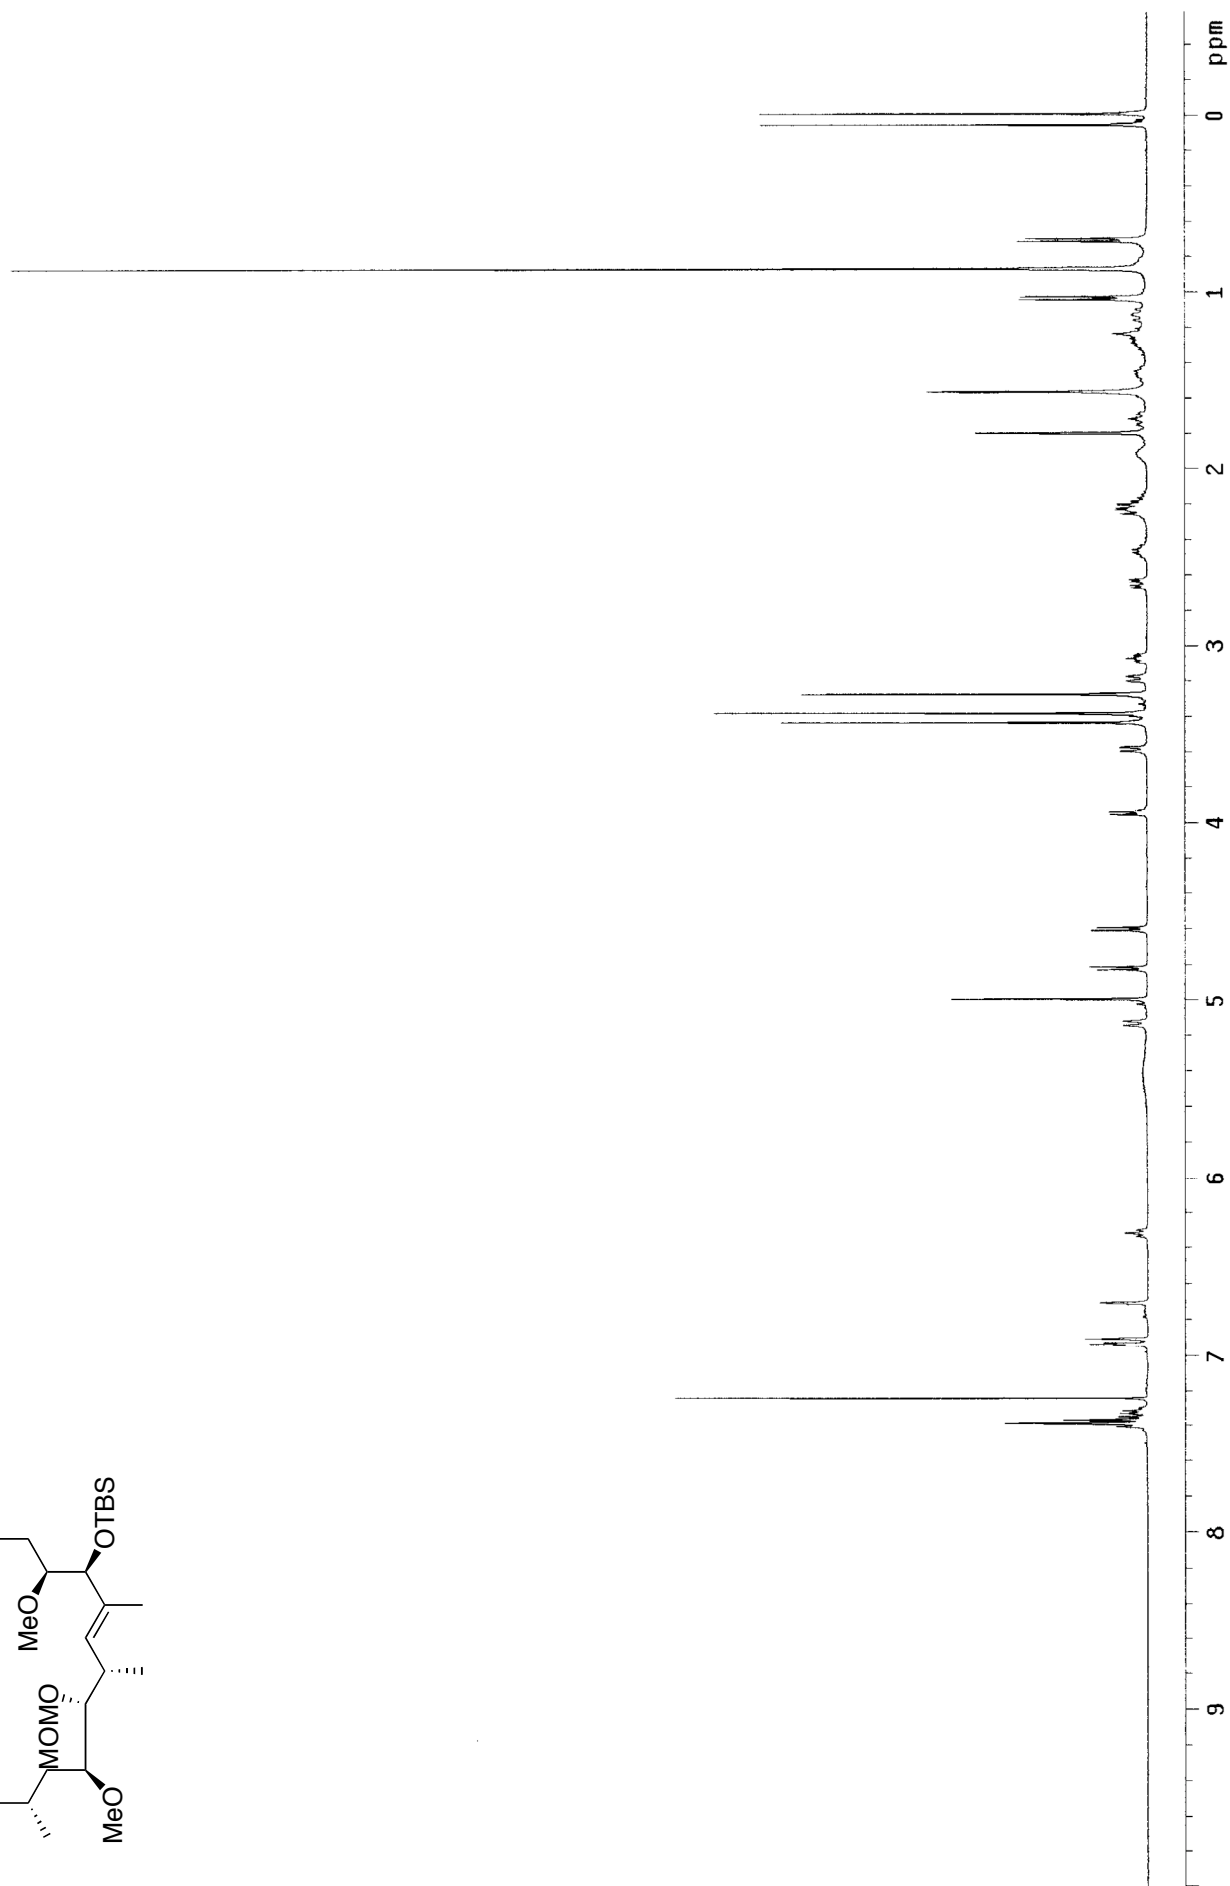

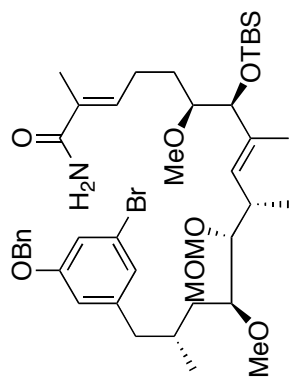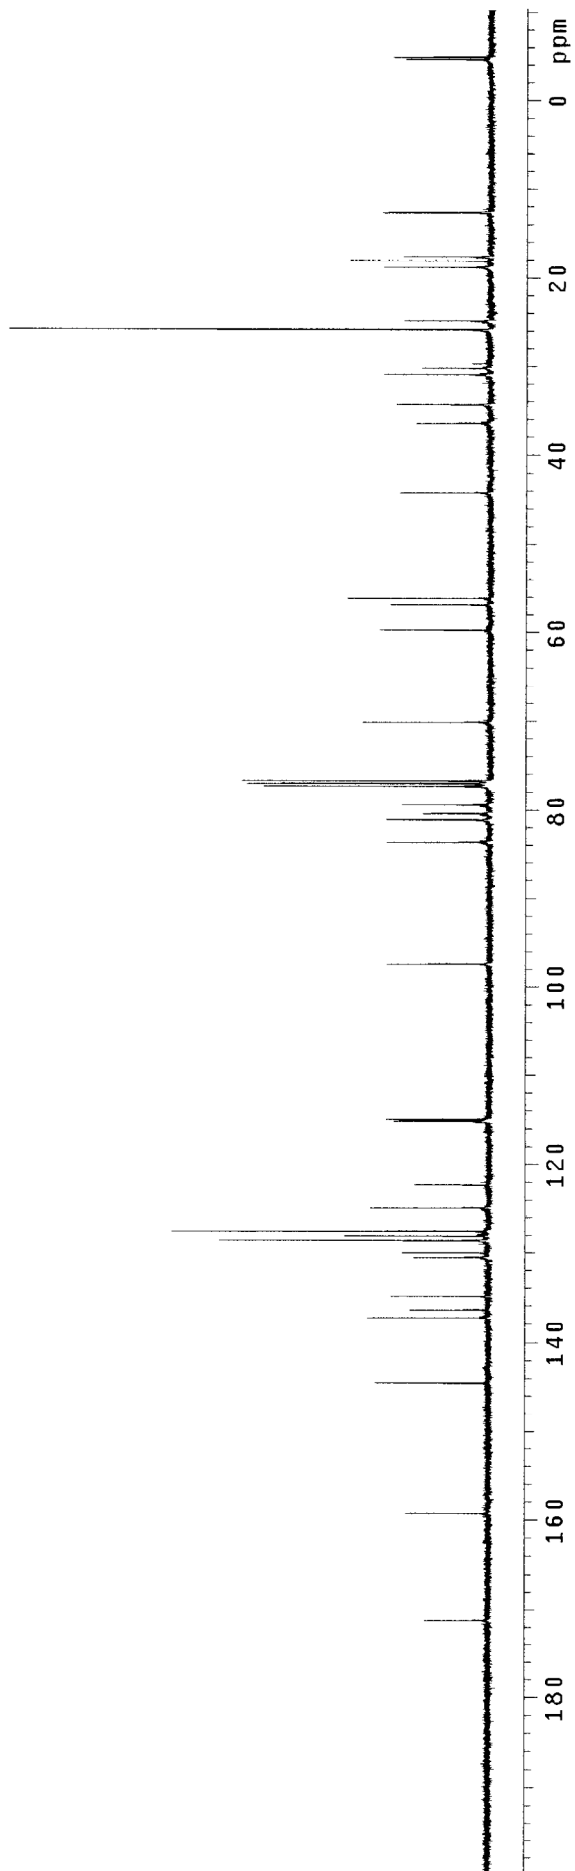

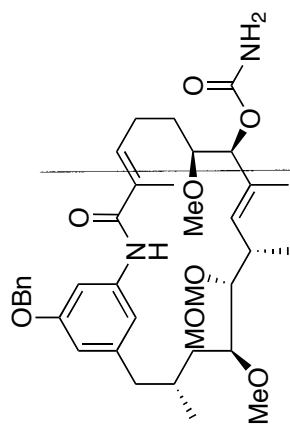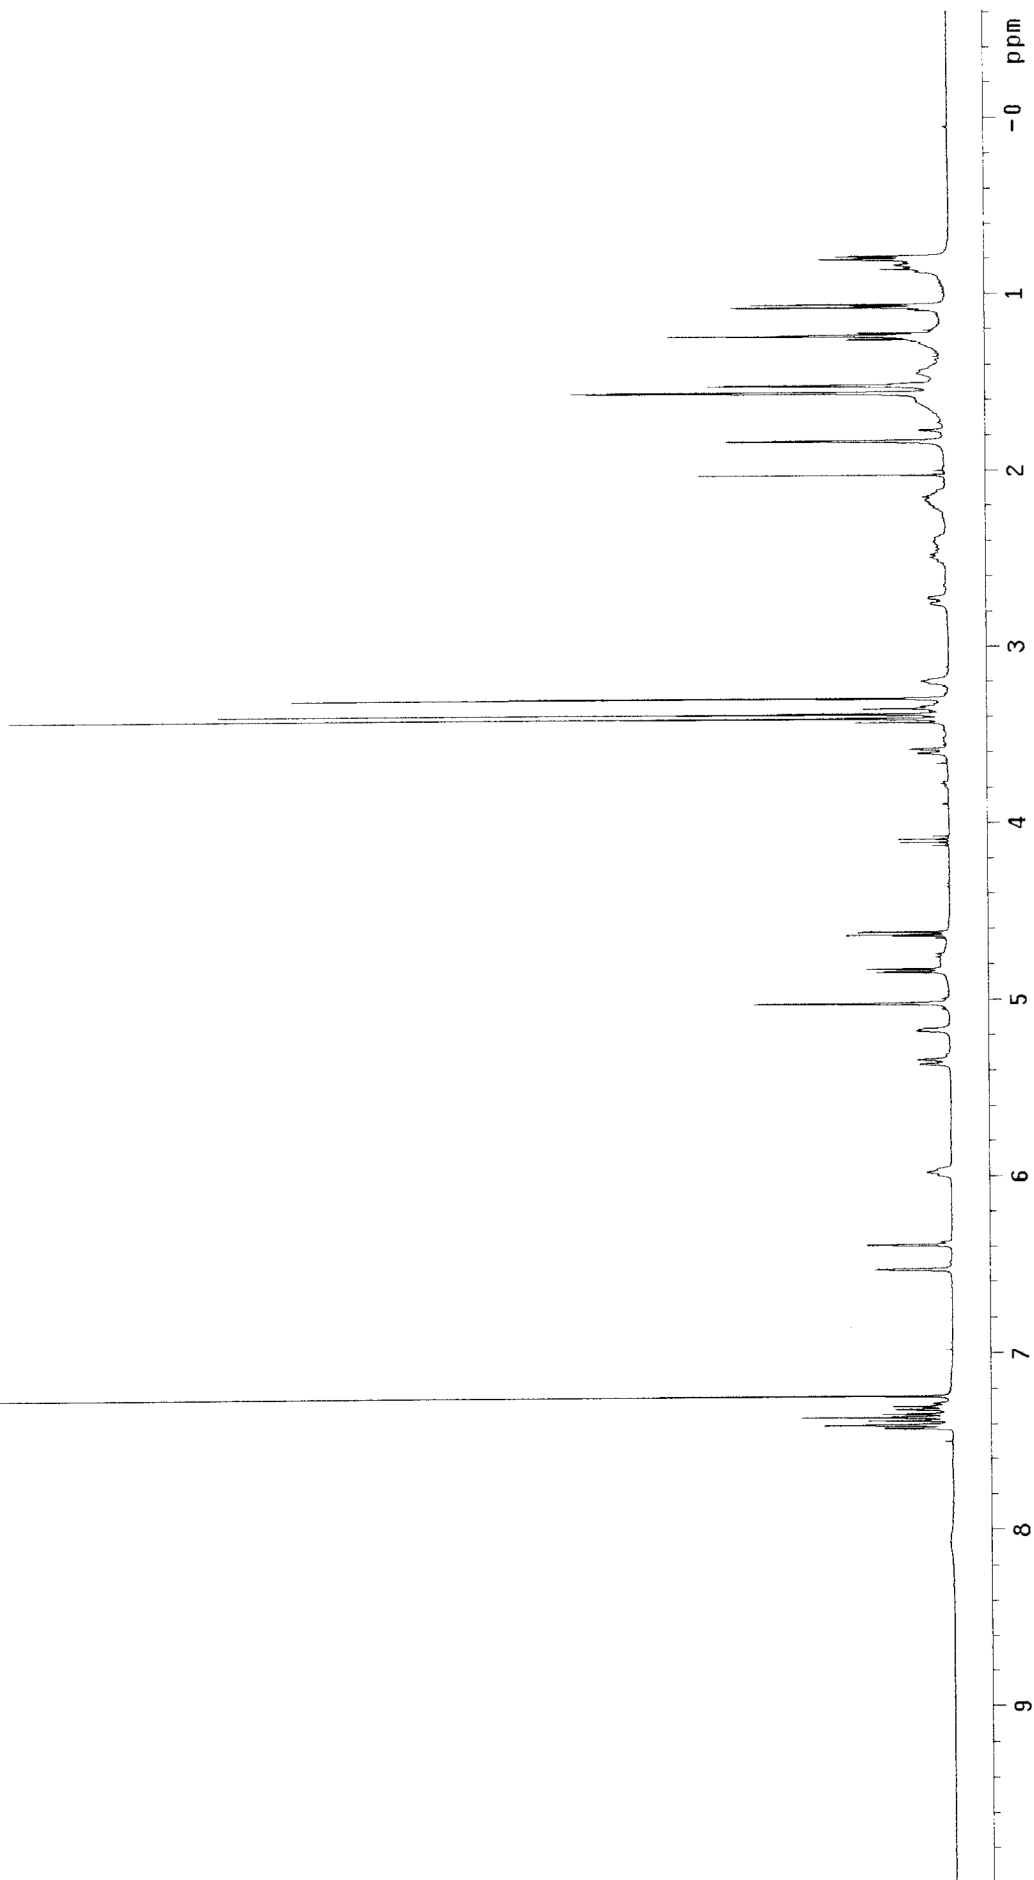

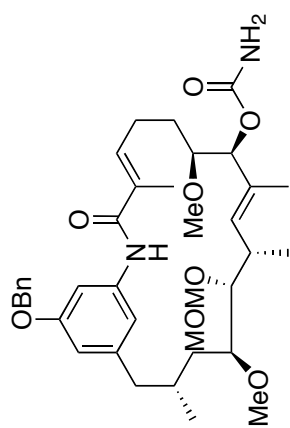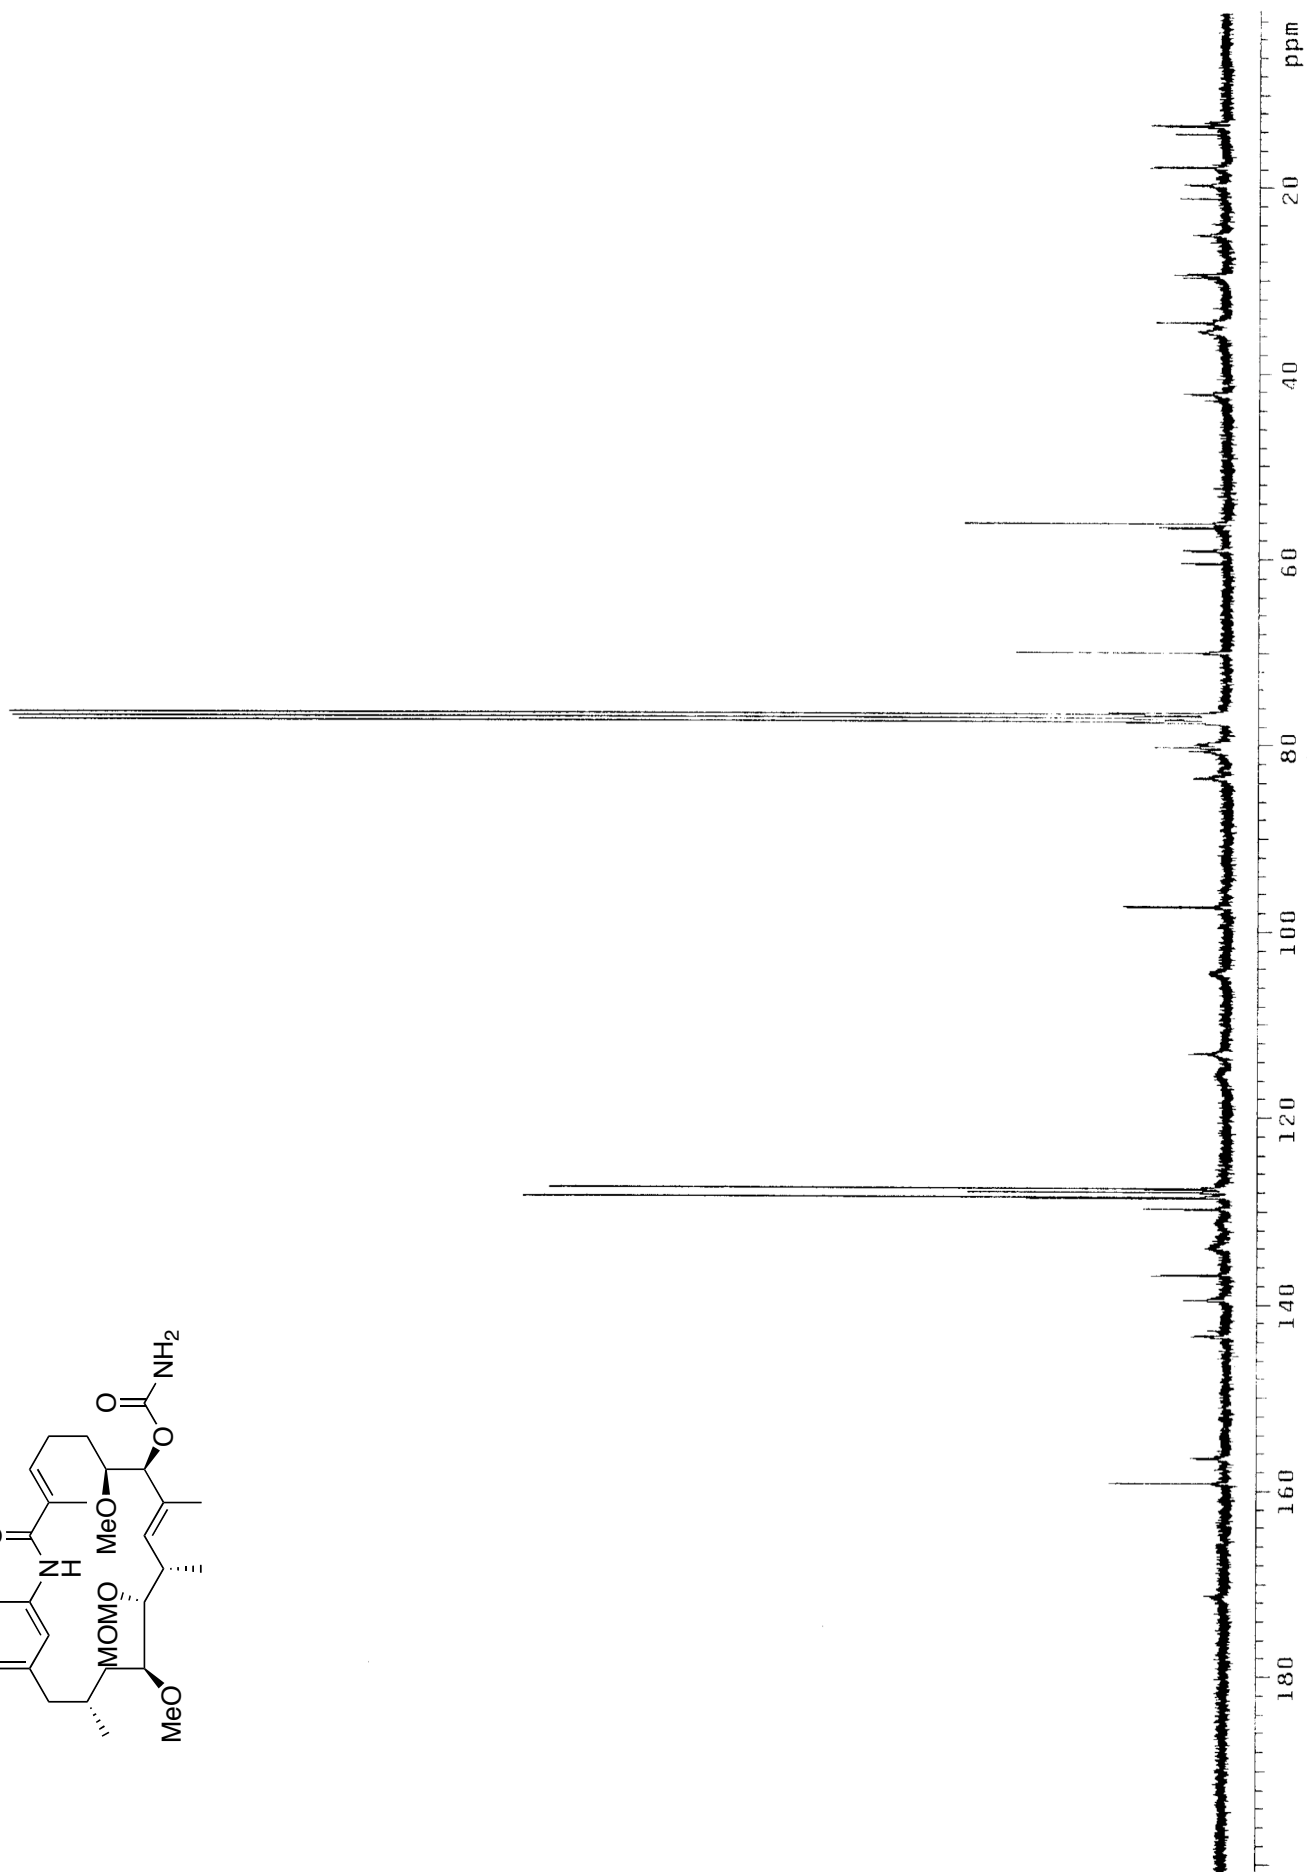



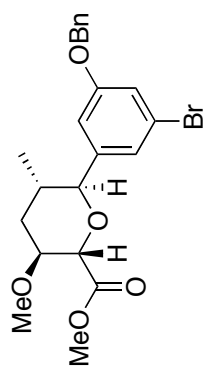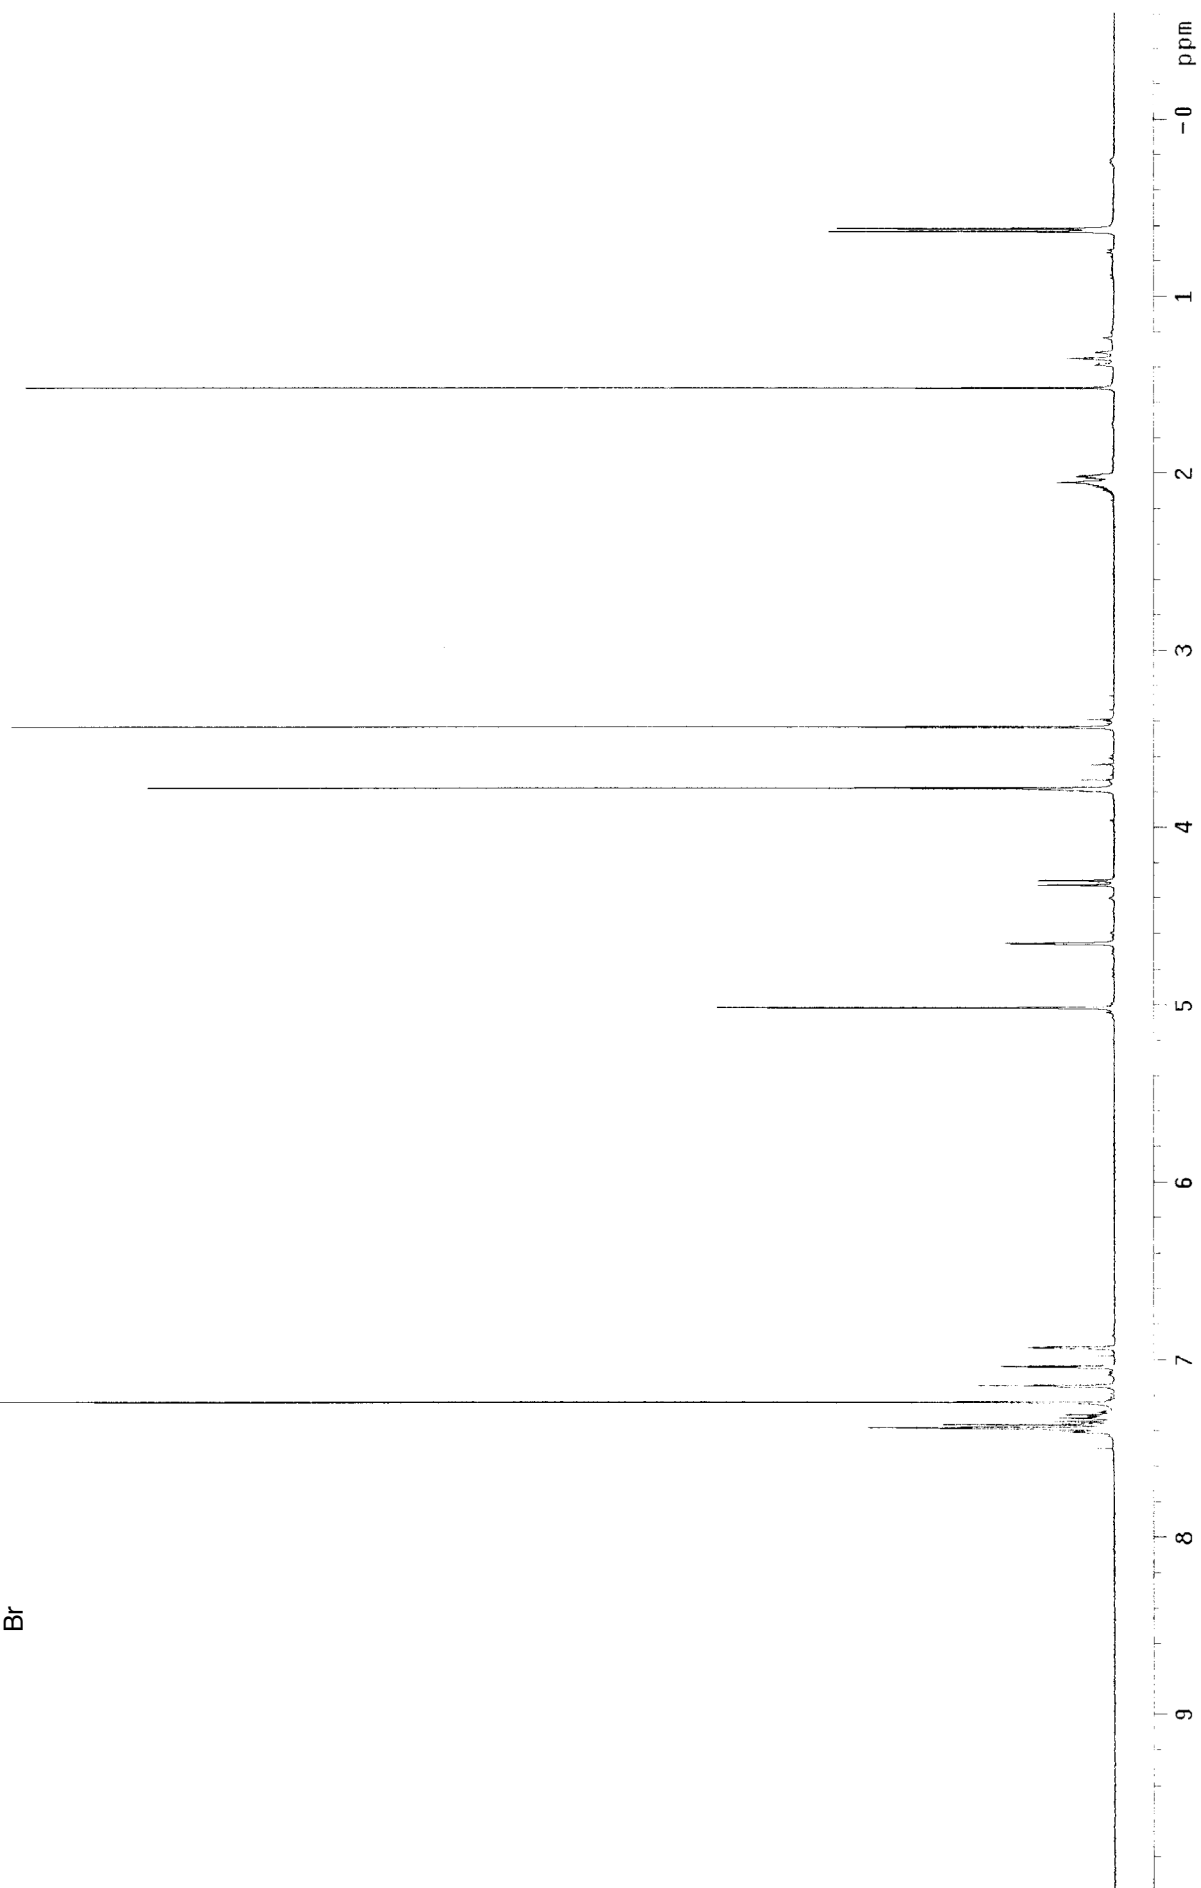

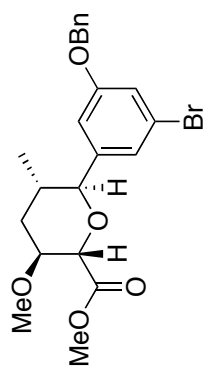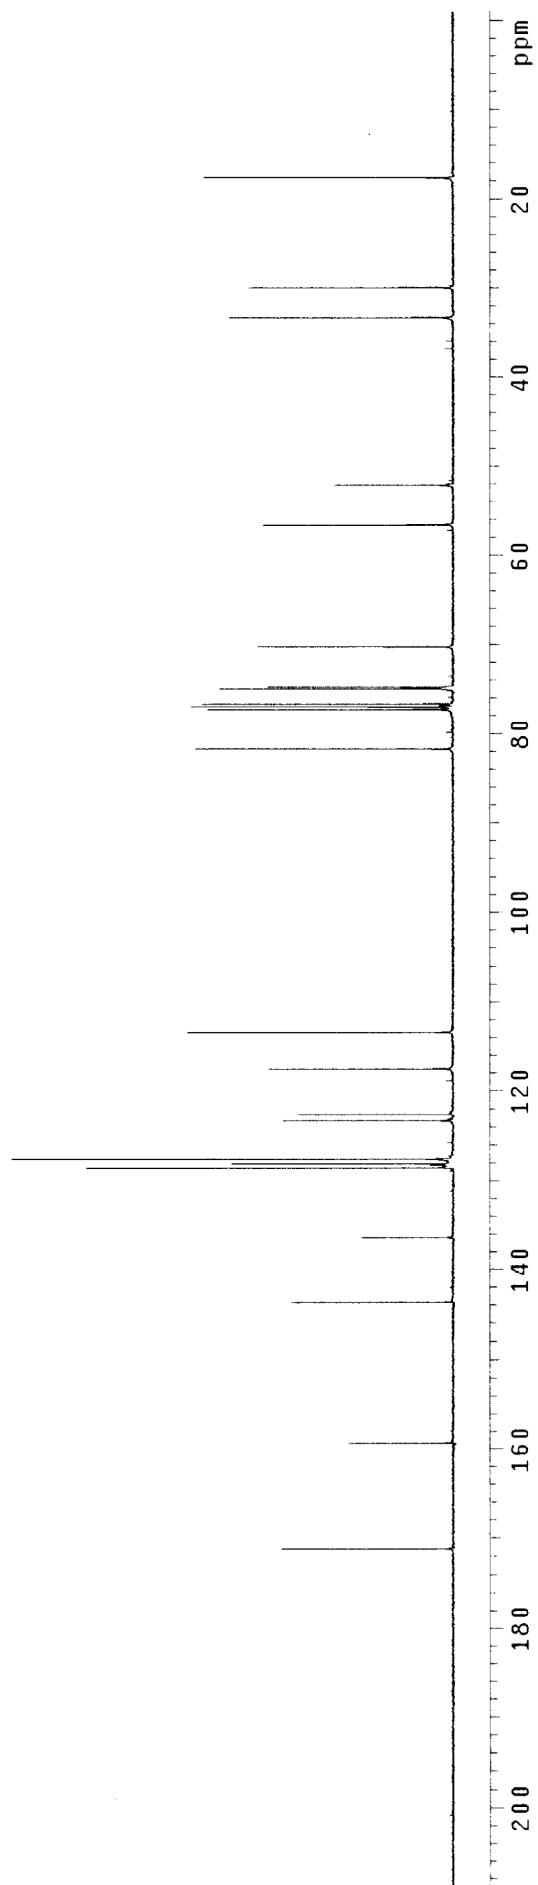

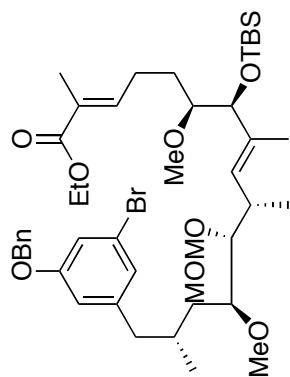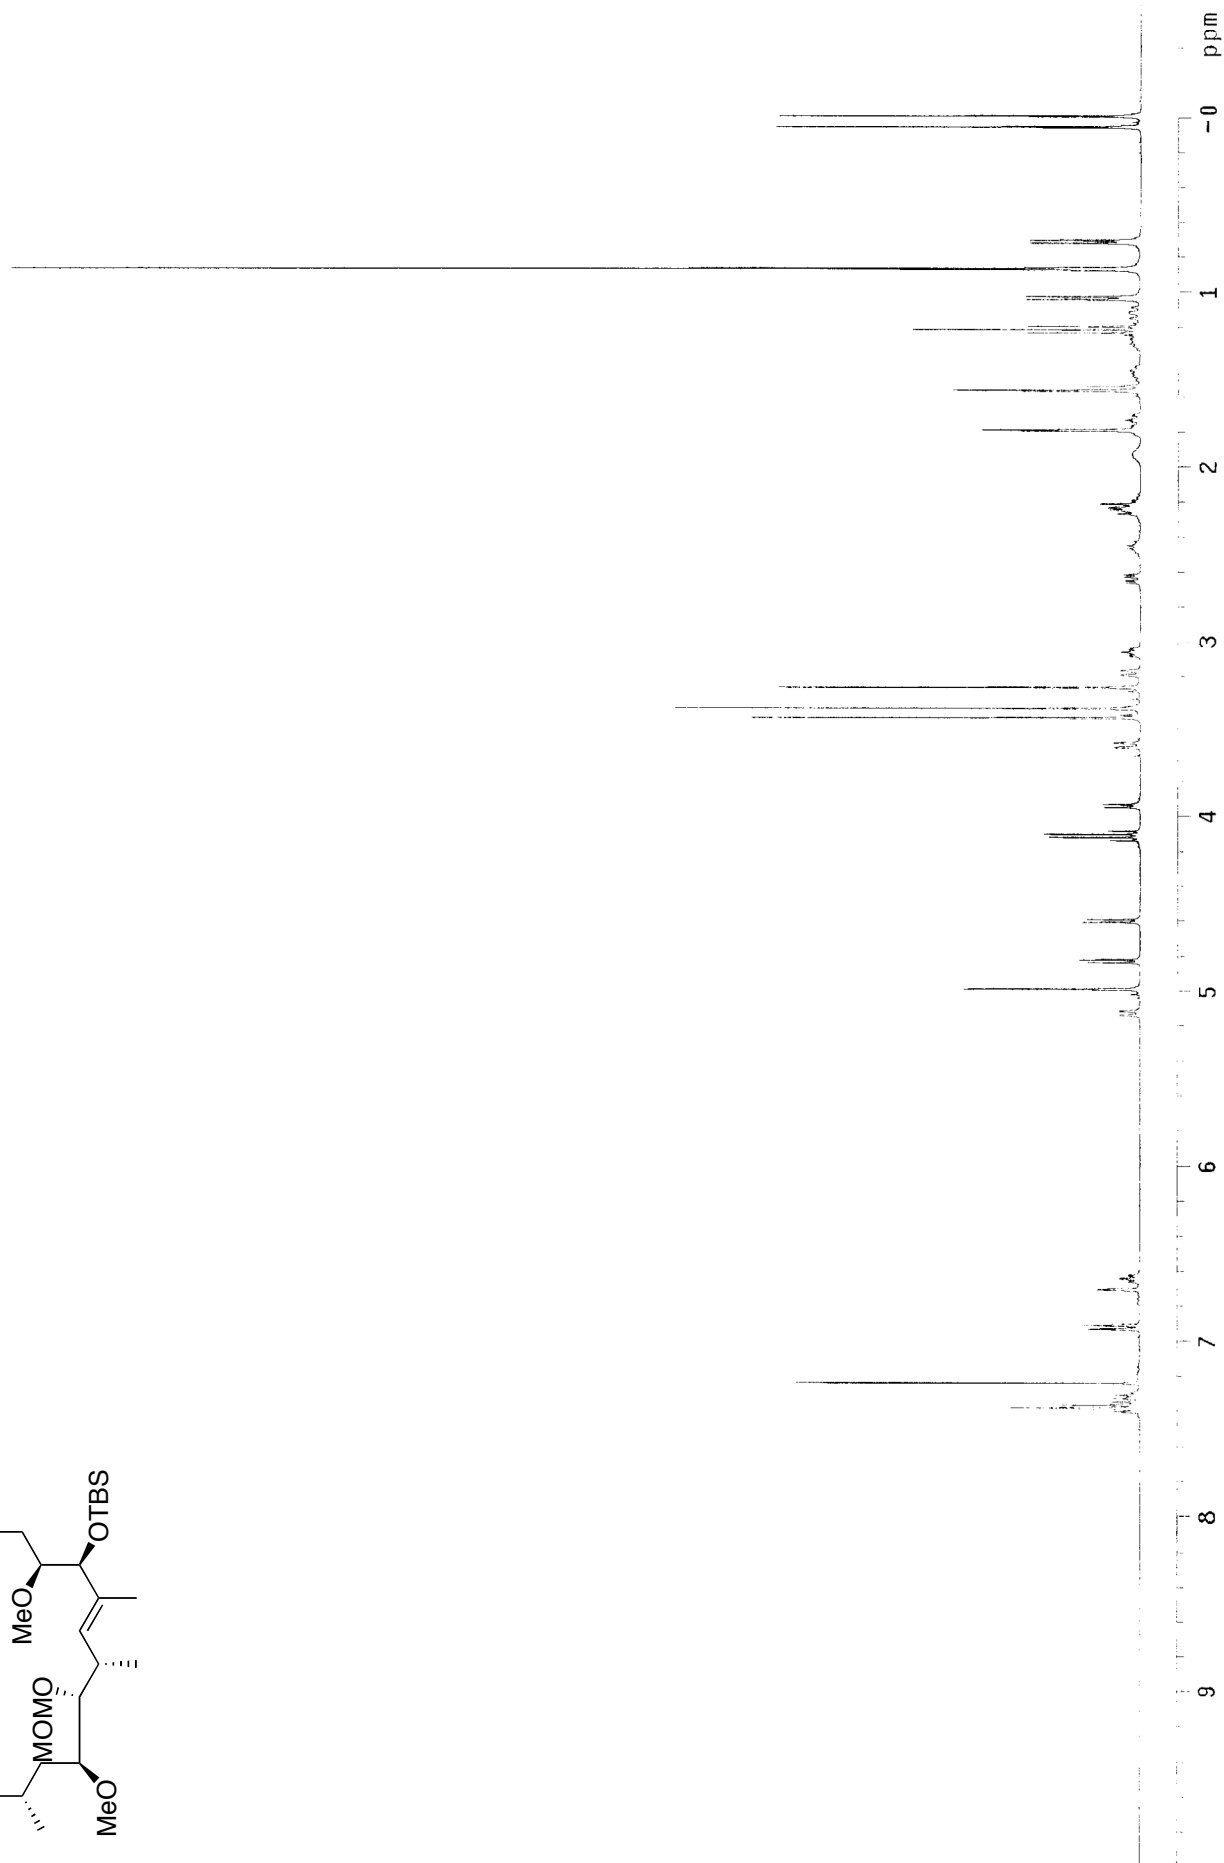

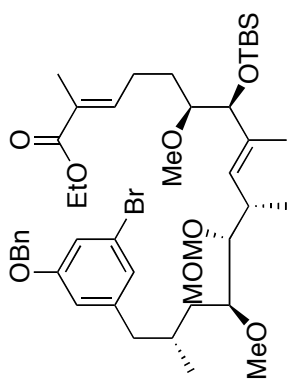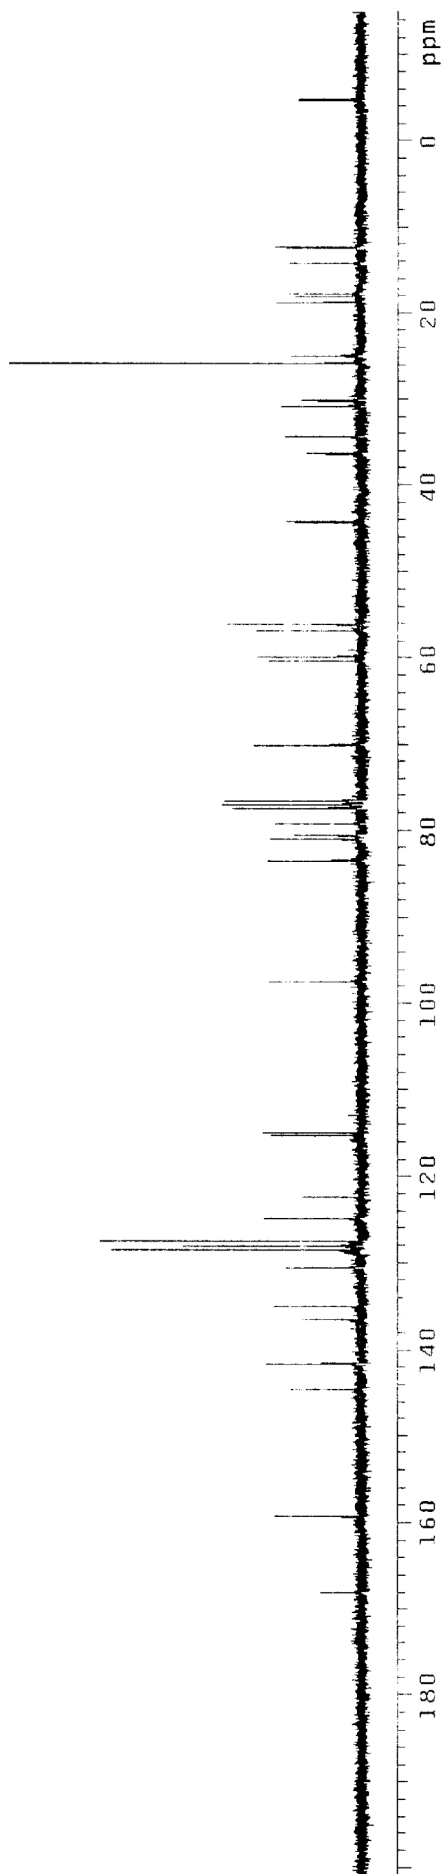

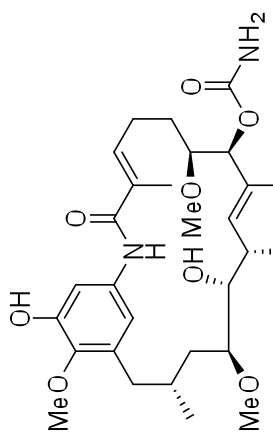

Reblastatin (1)  
300 MHz,  $d_6$ -DMSO

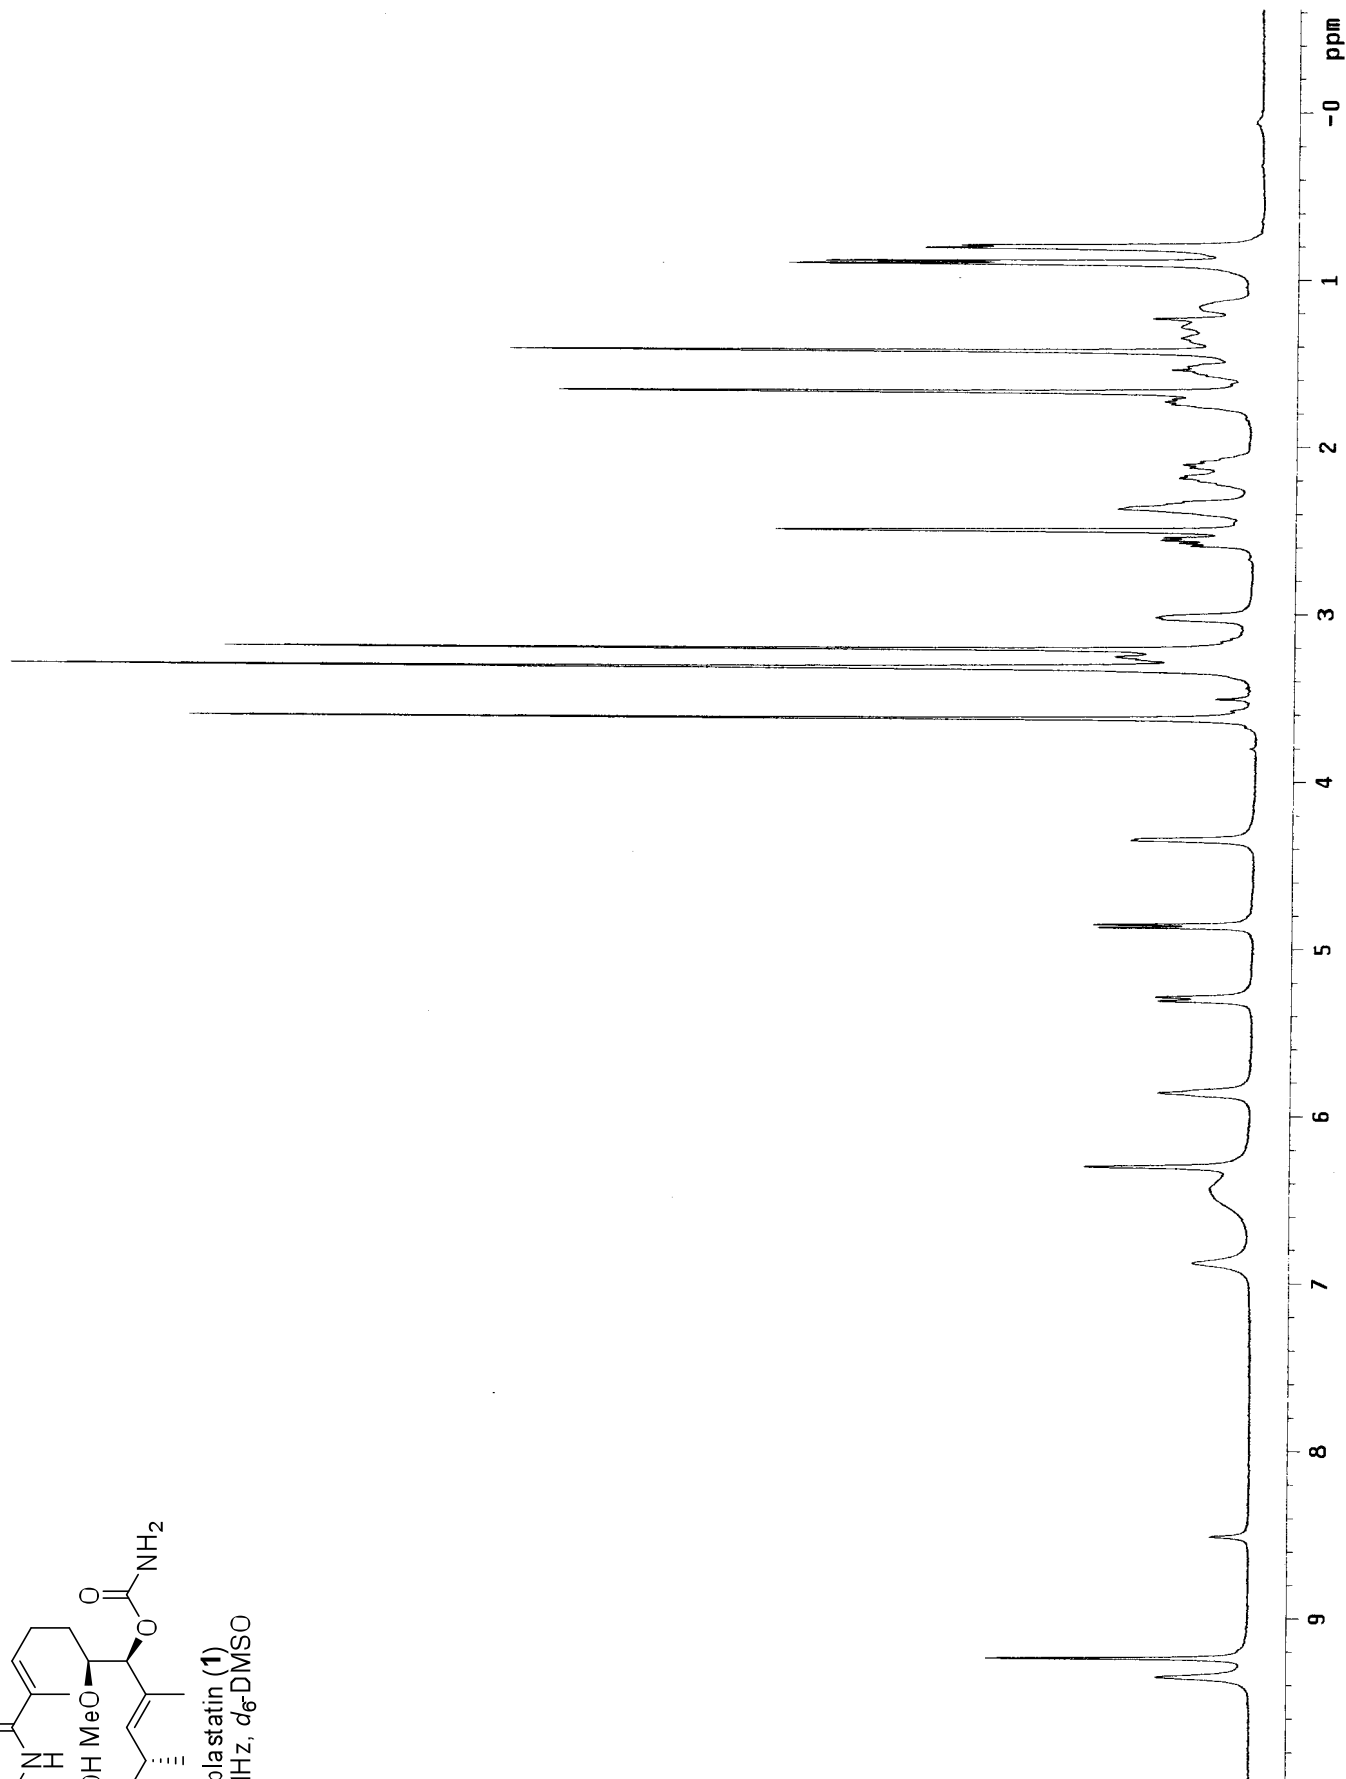

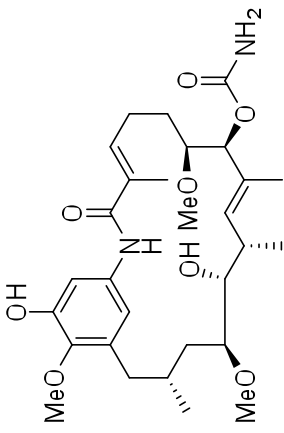

Reblastatin (1)  
300 MHz,  $d_6$ -DMSO

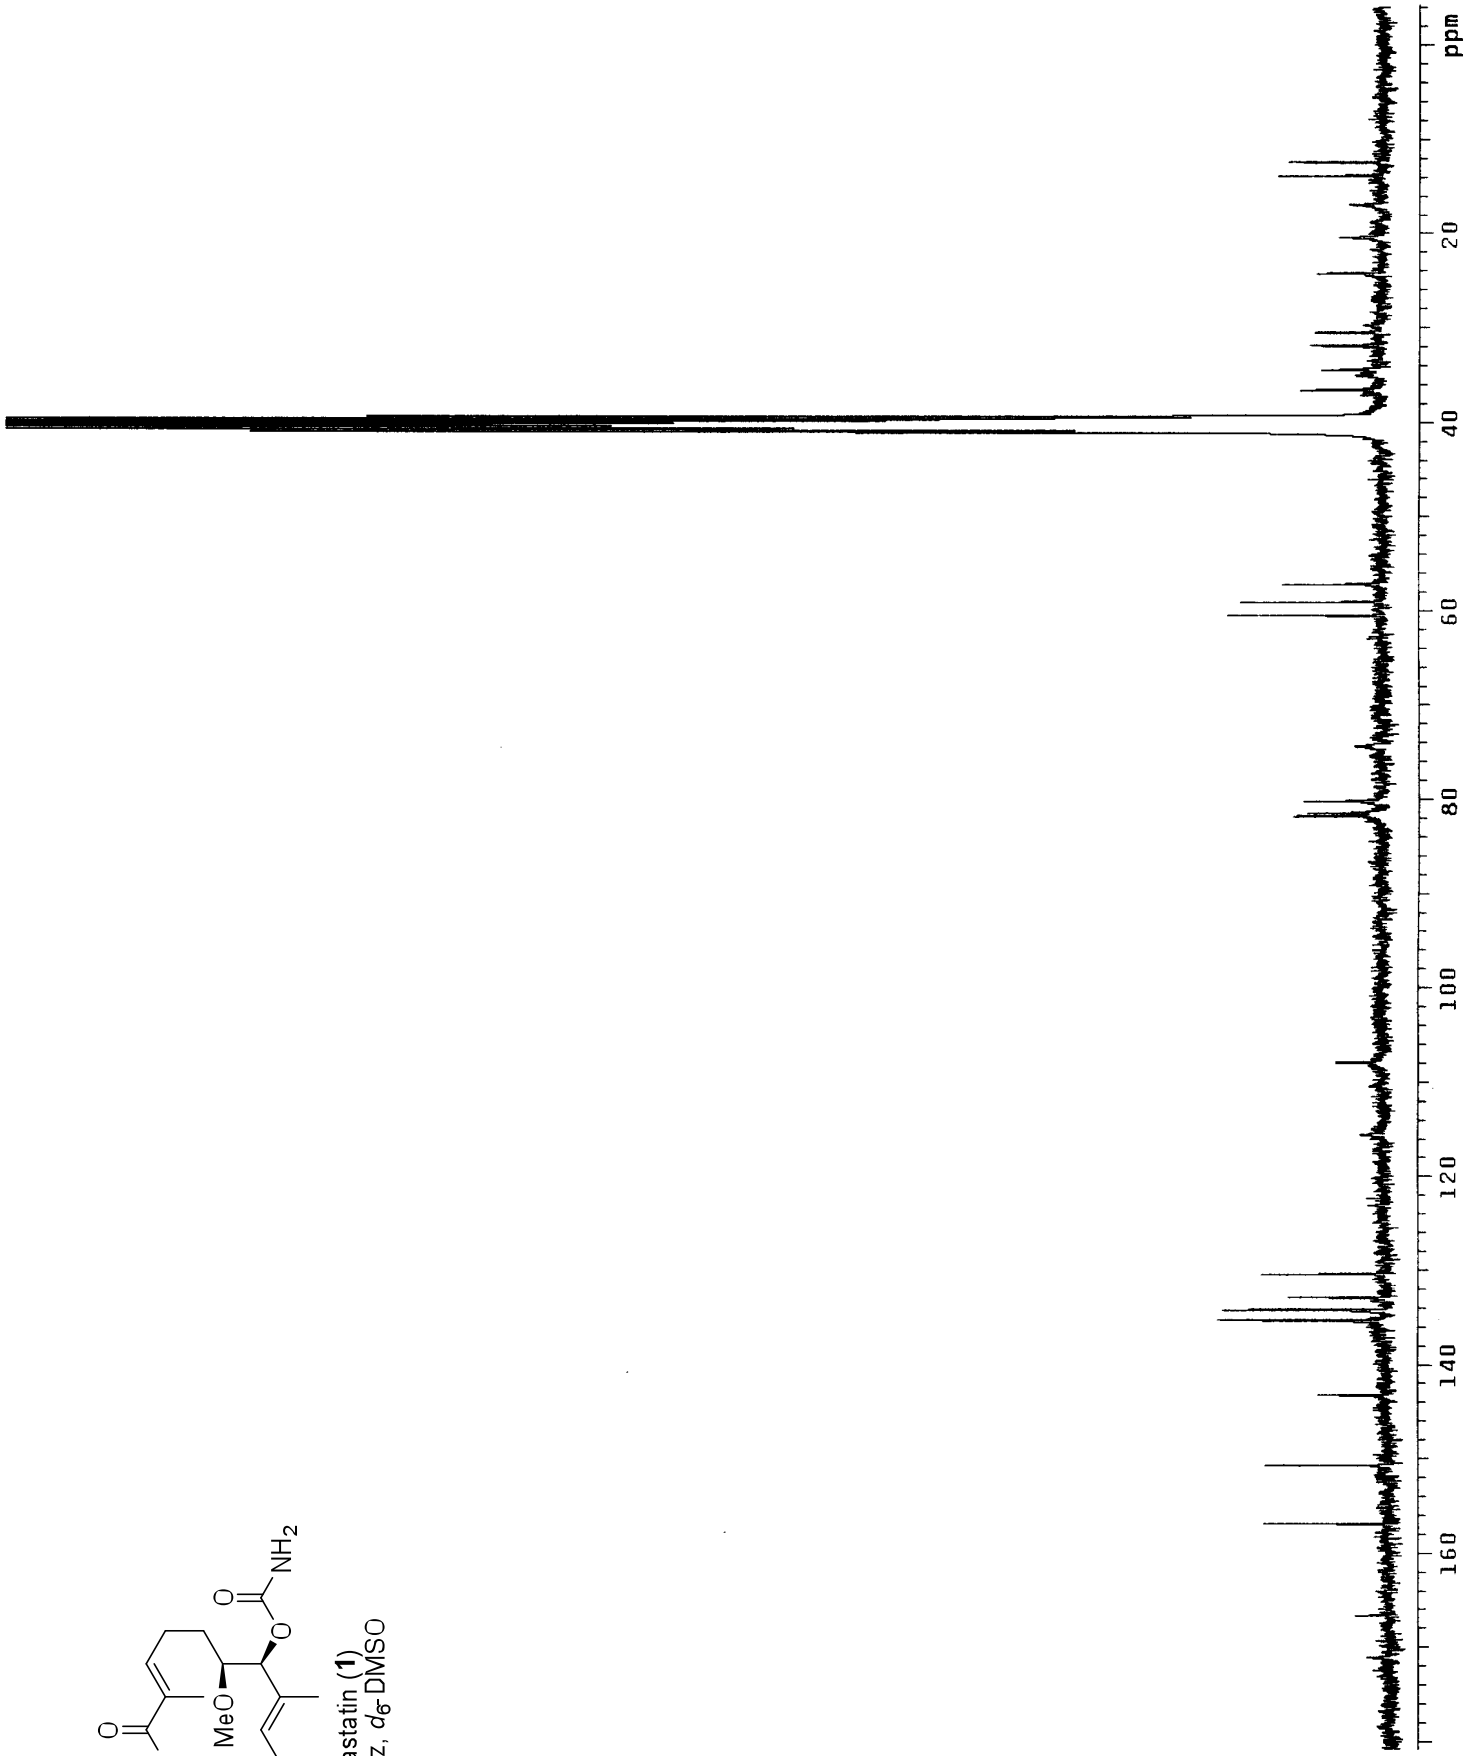

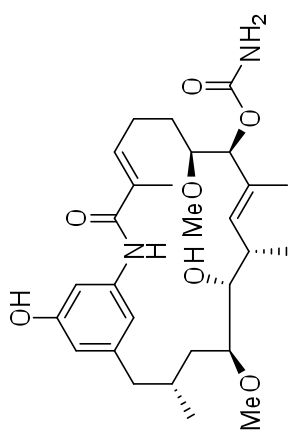

Autolytmycin (2)  
300 MHz,  $d_6$ -DMSO, 50 °C

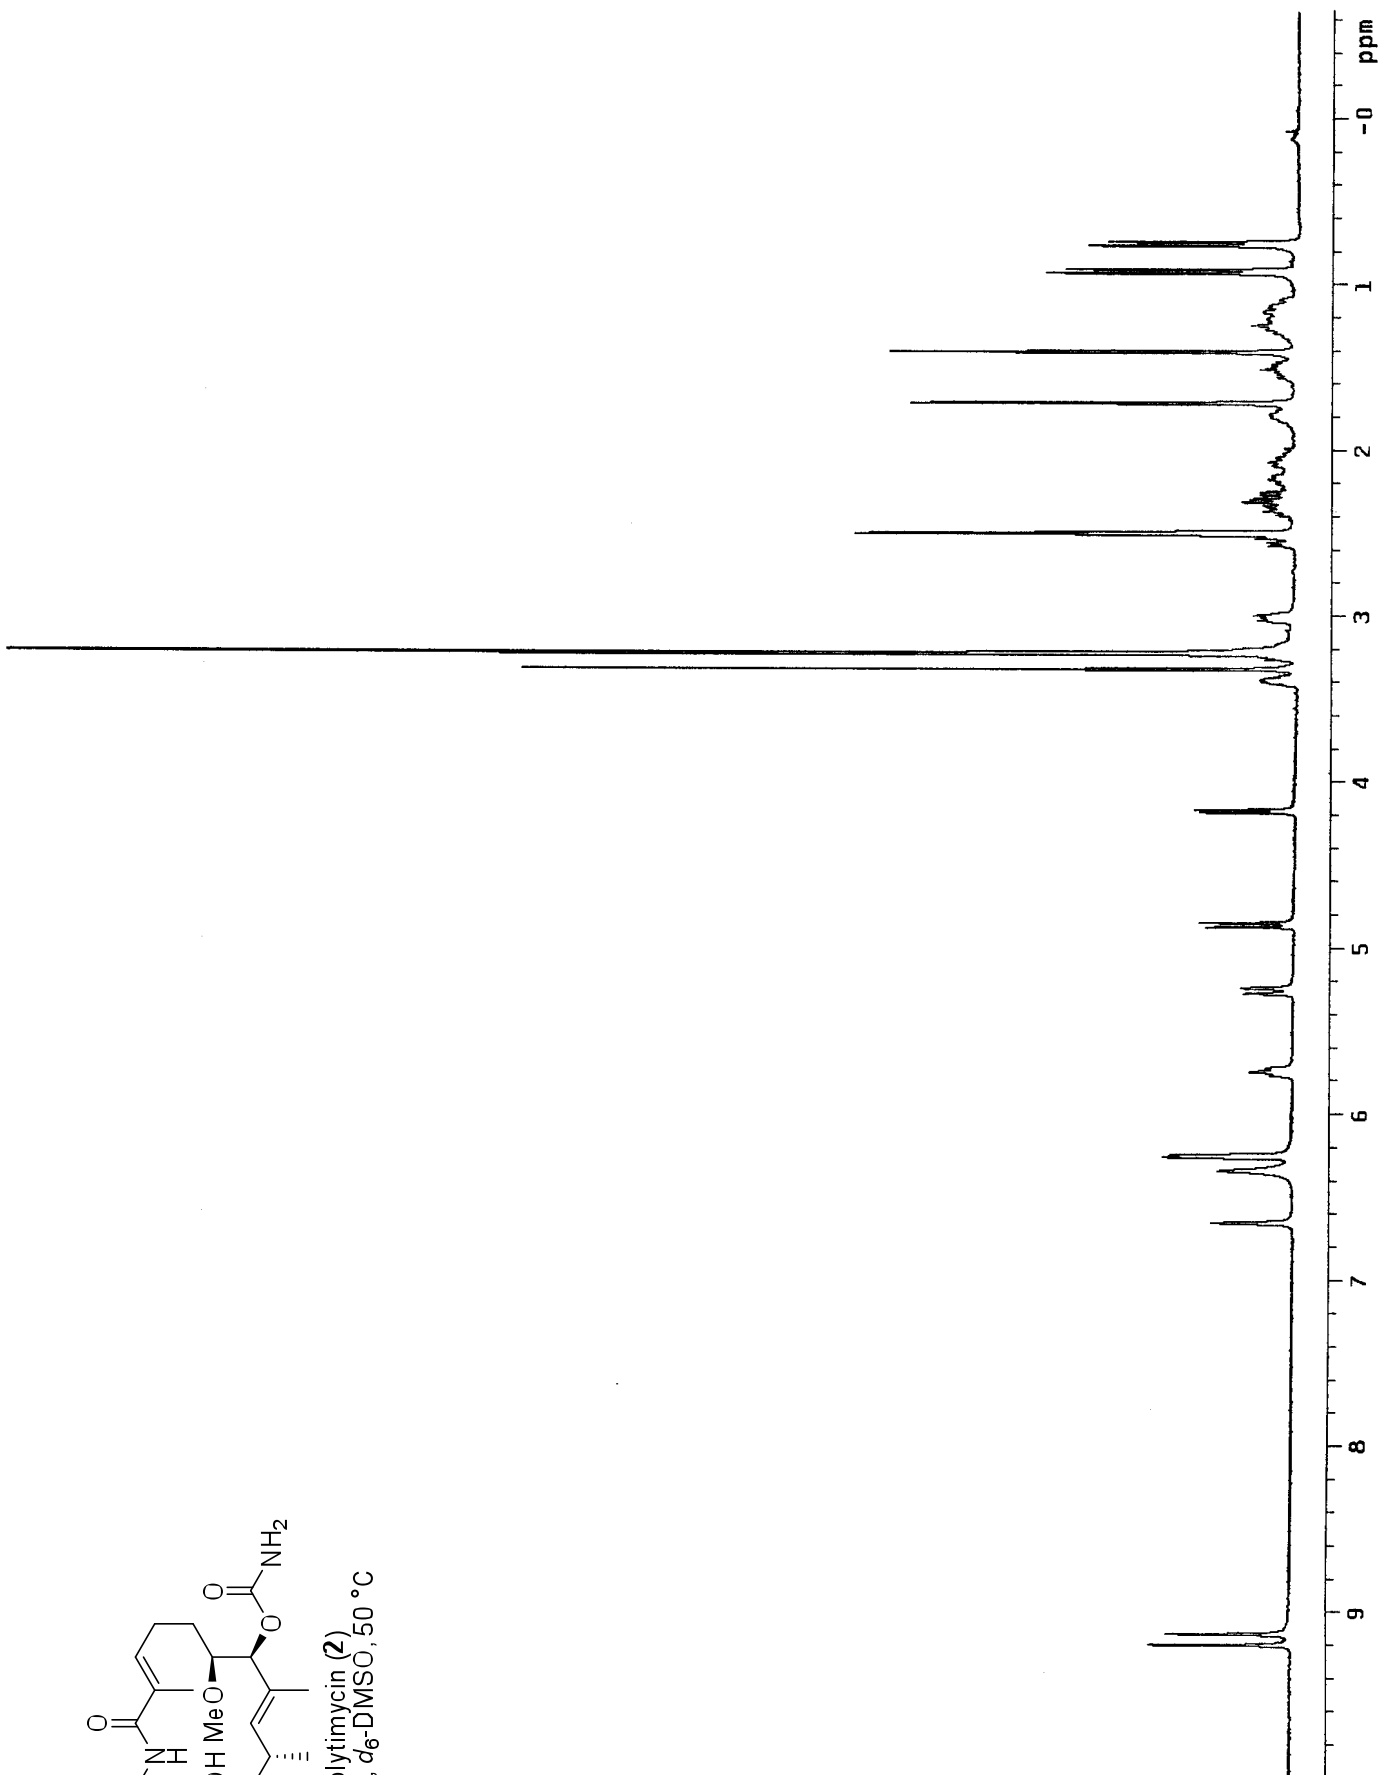

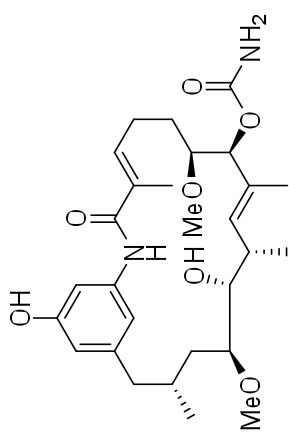

Autolytmycin (2)  
75 MHz,  $d_6$ -DMSO, 50 °C

SI-75

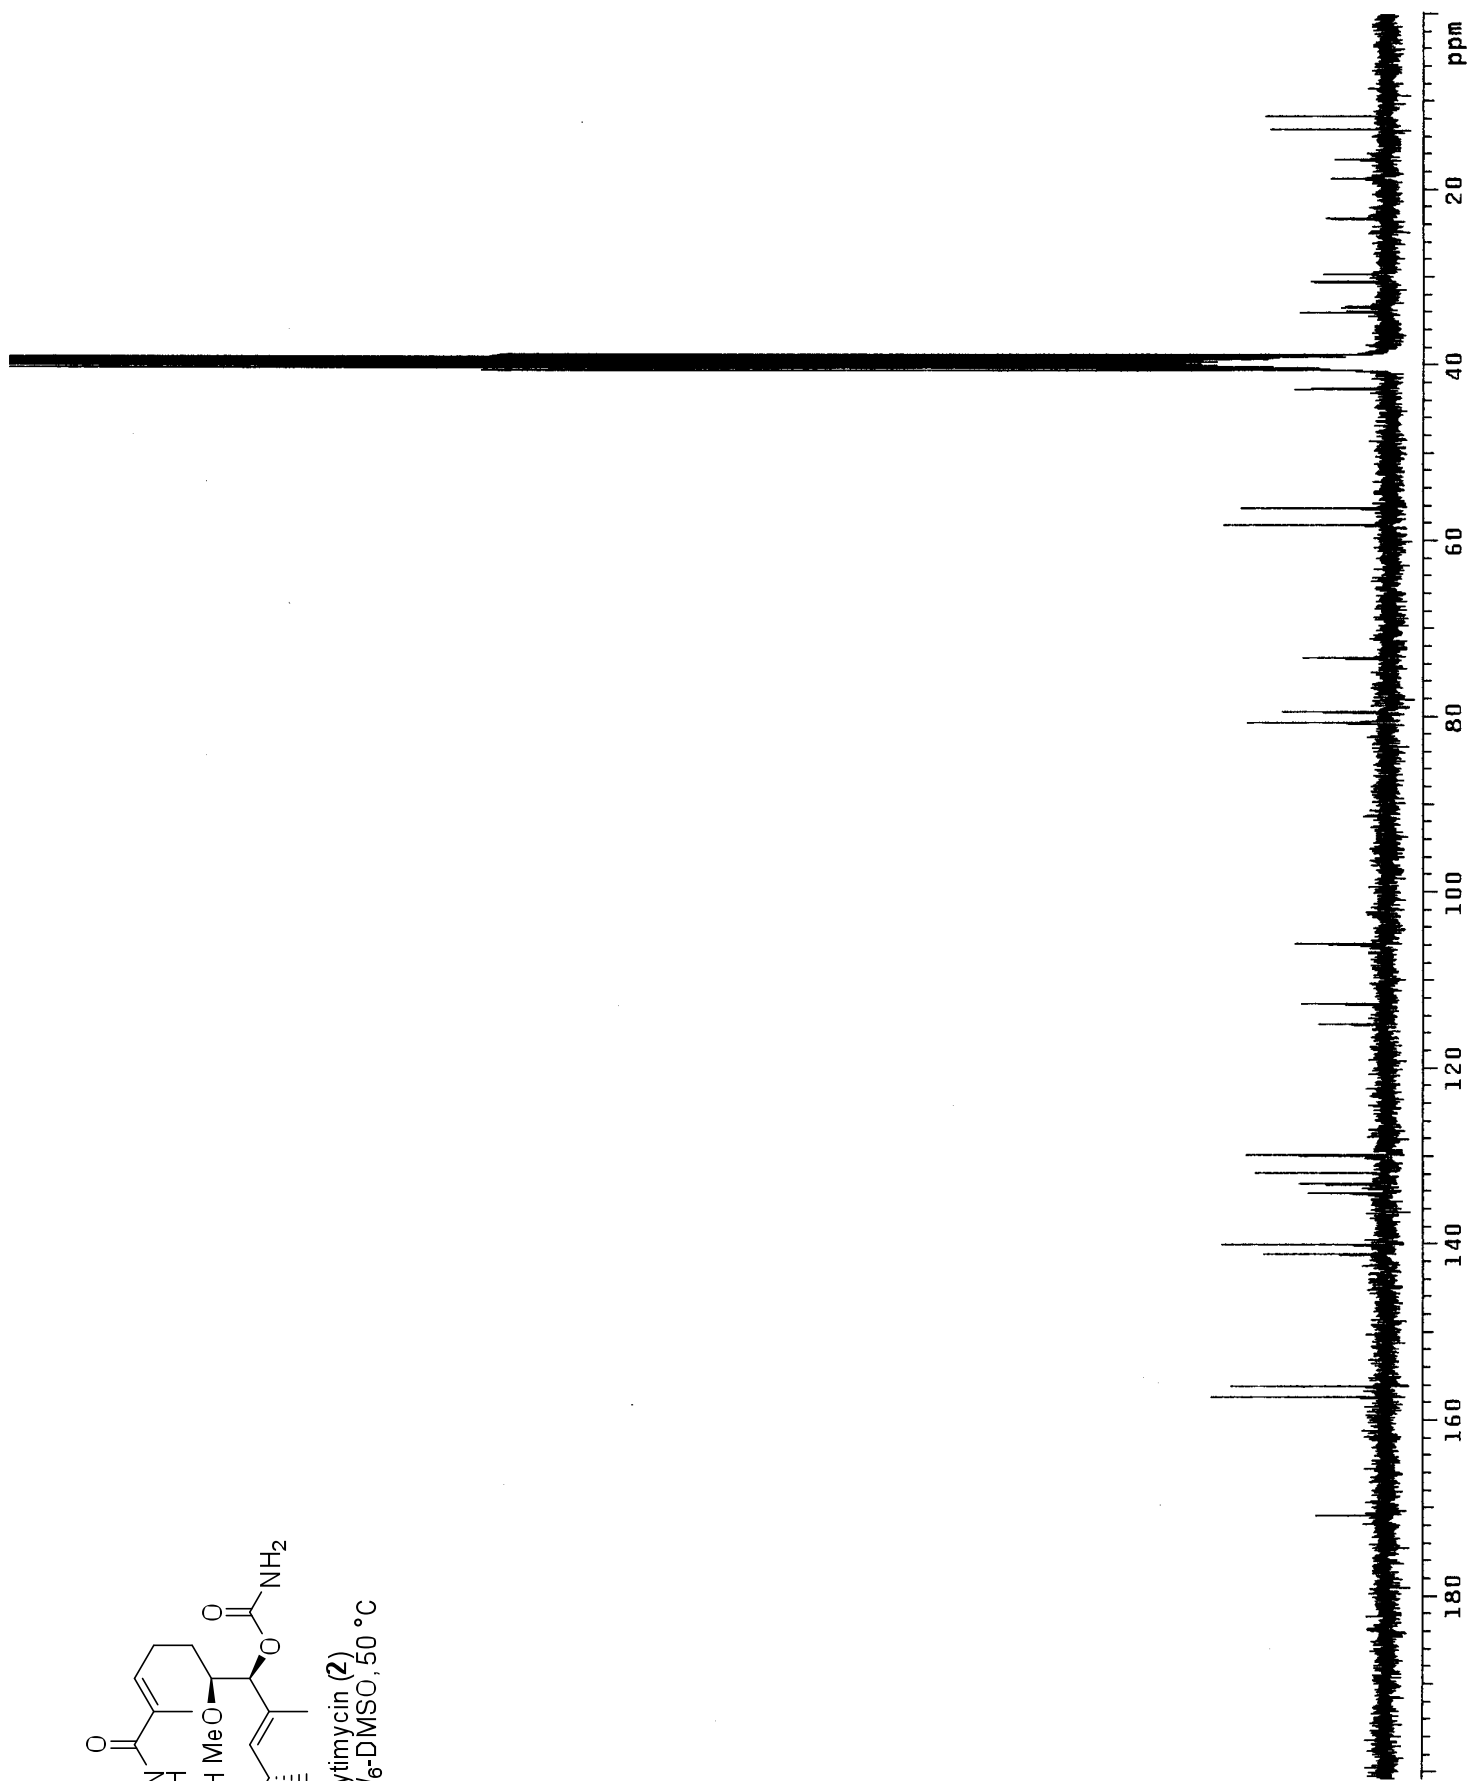



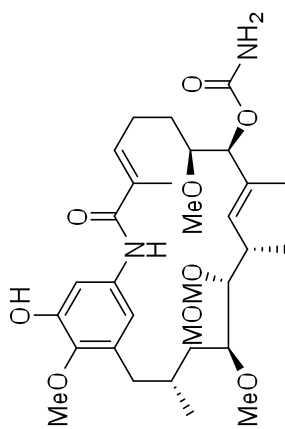

6

400 MHz, CDCl<sub>3</sub>

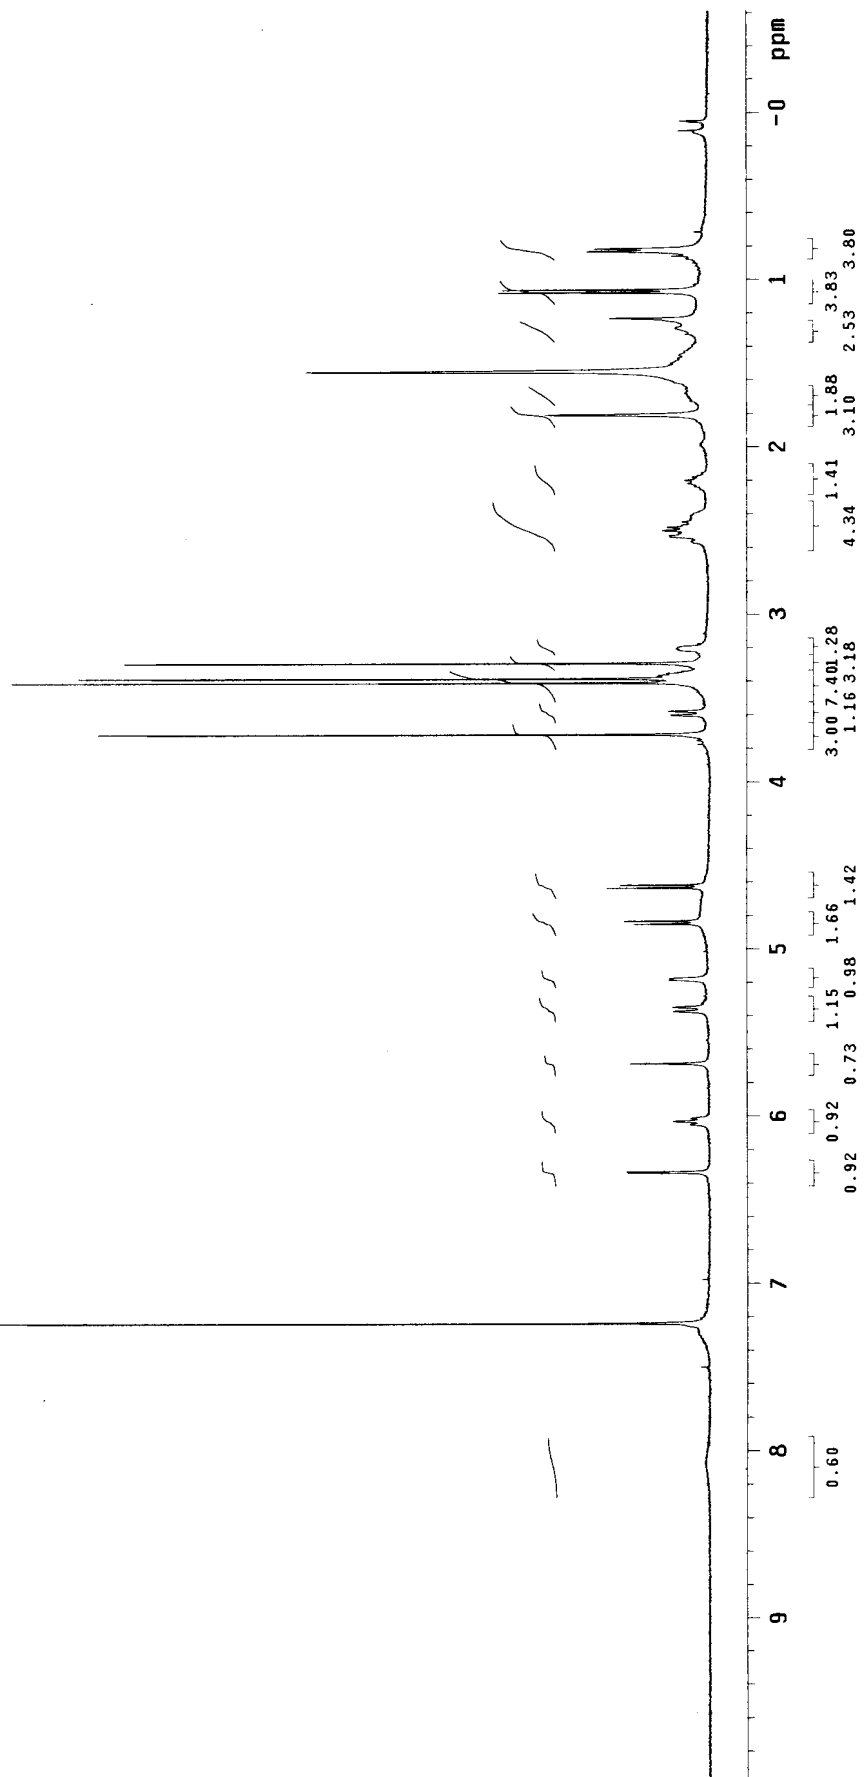

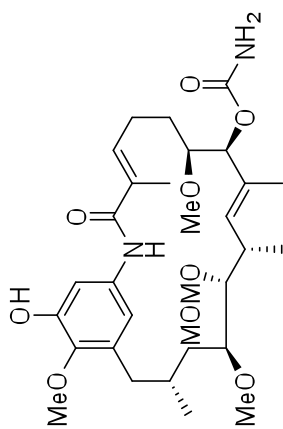

**6**

75 MHz, CDCl<sub>3</sub>

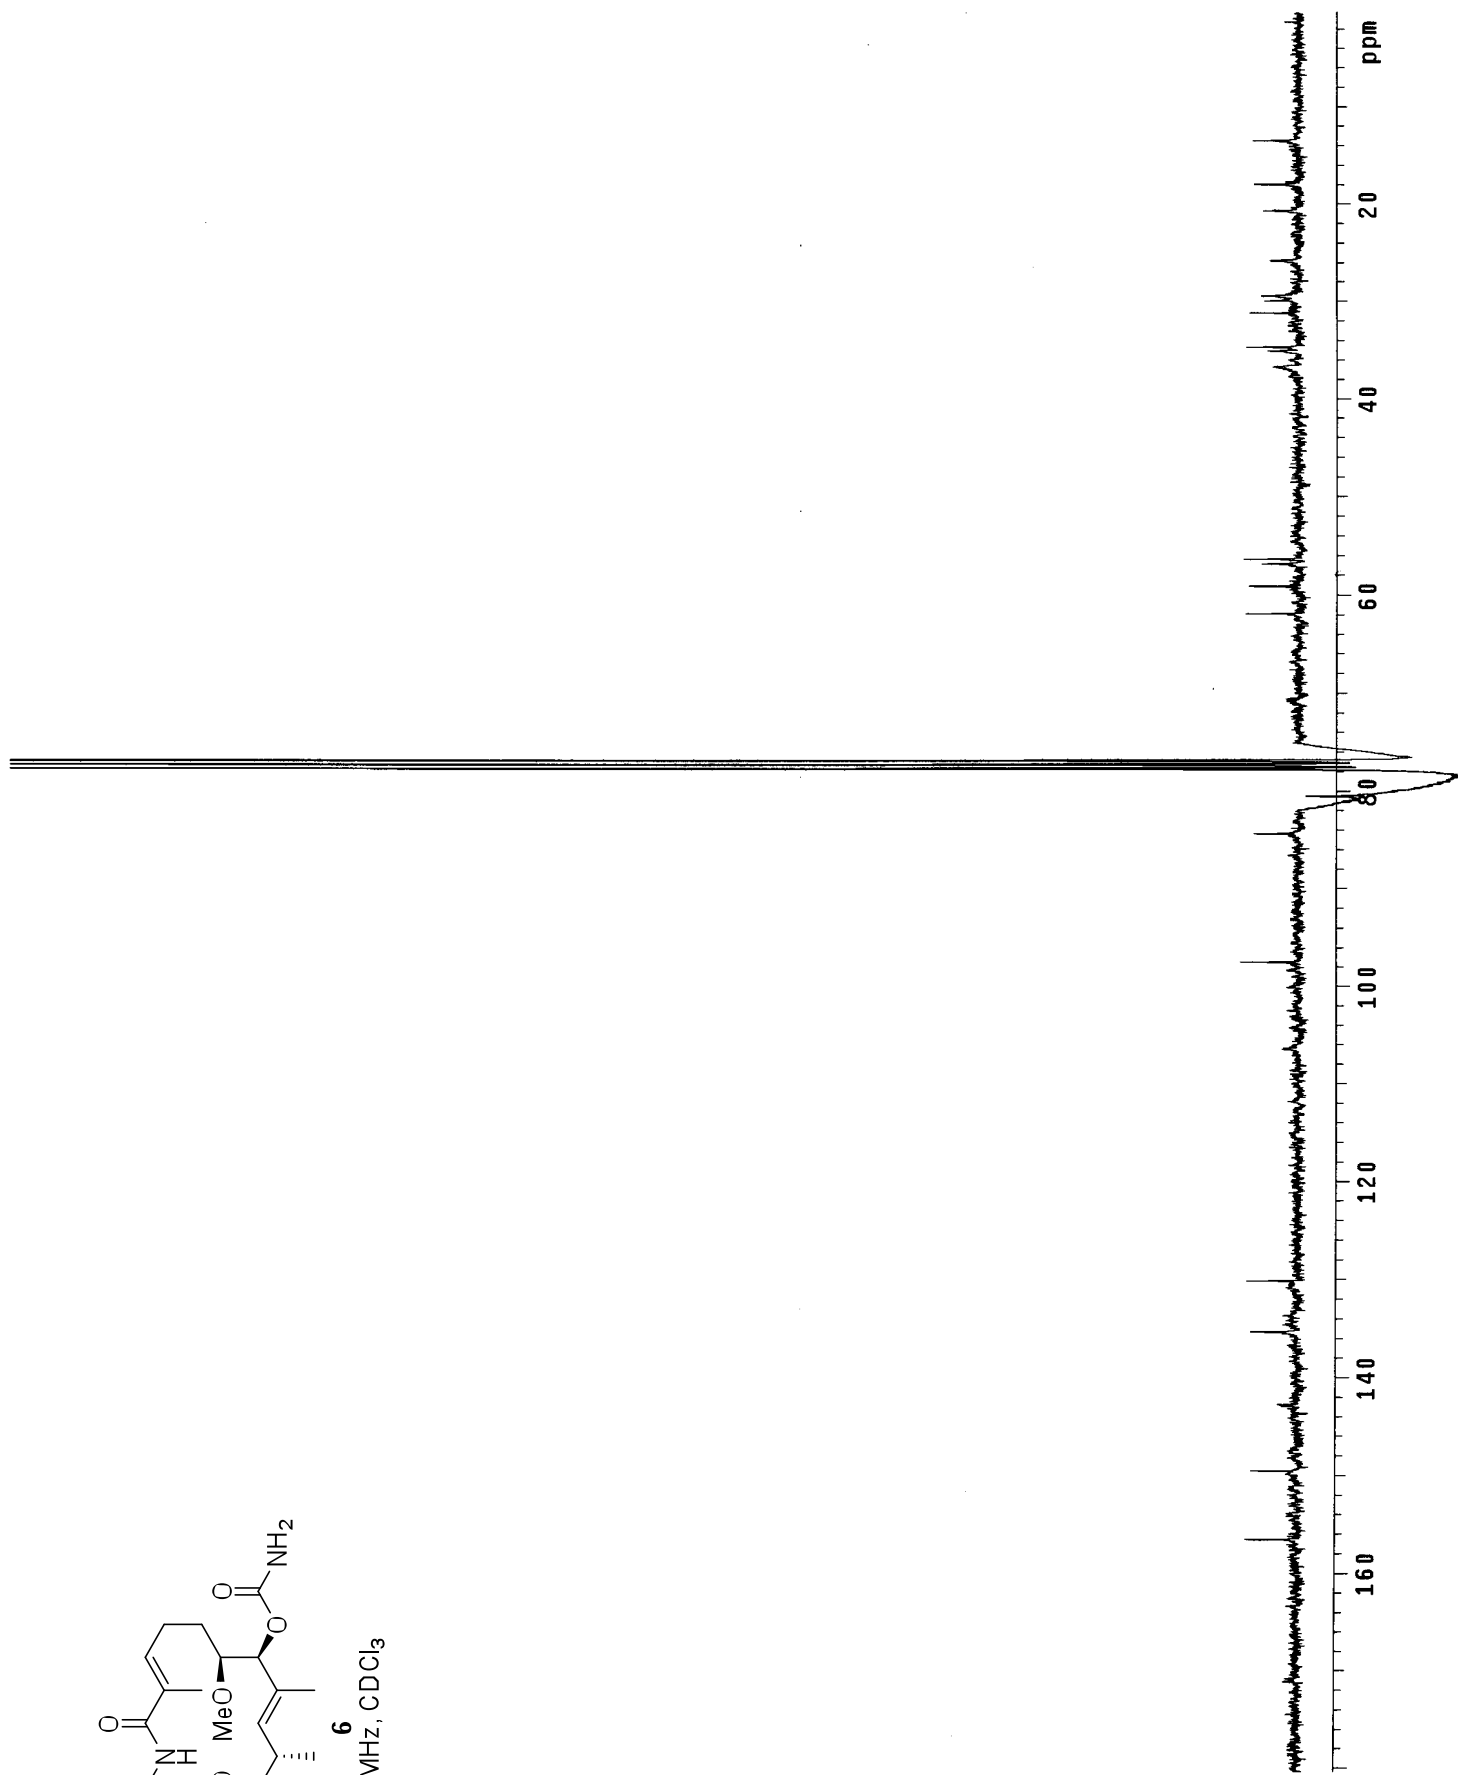

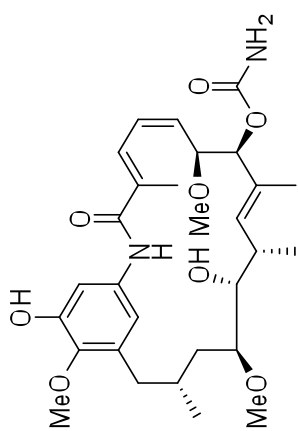

7

300 MHz,  $d_6$ -DMSO, 50 °C

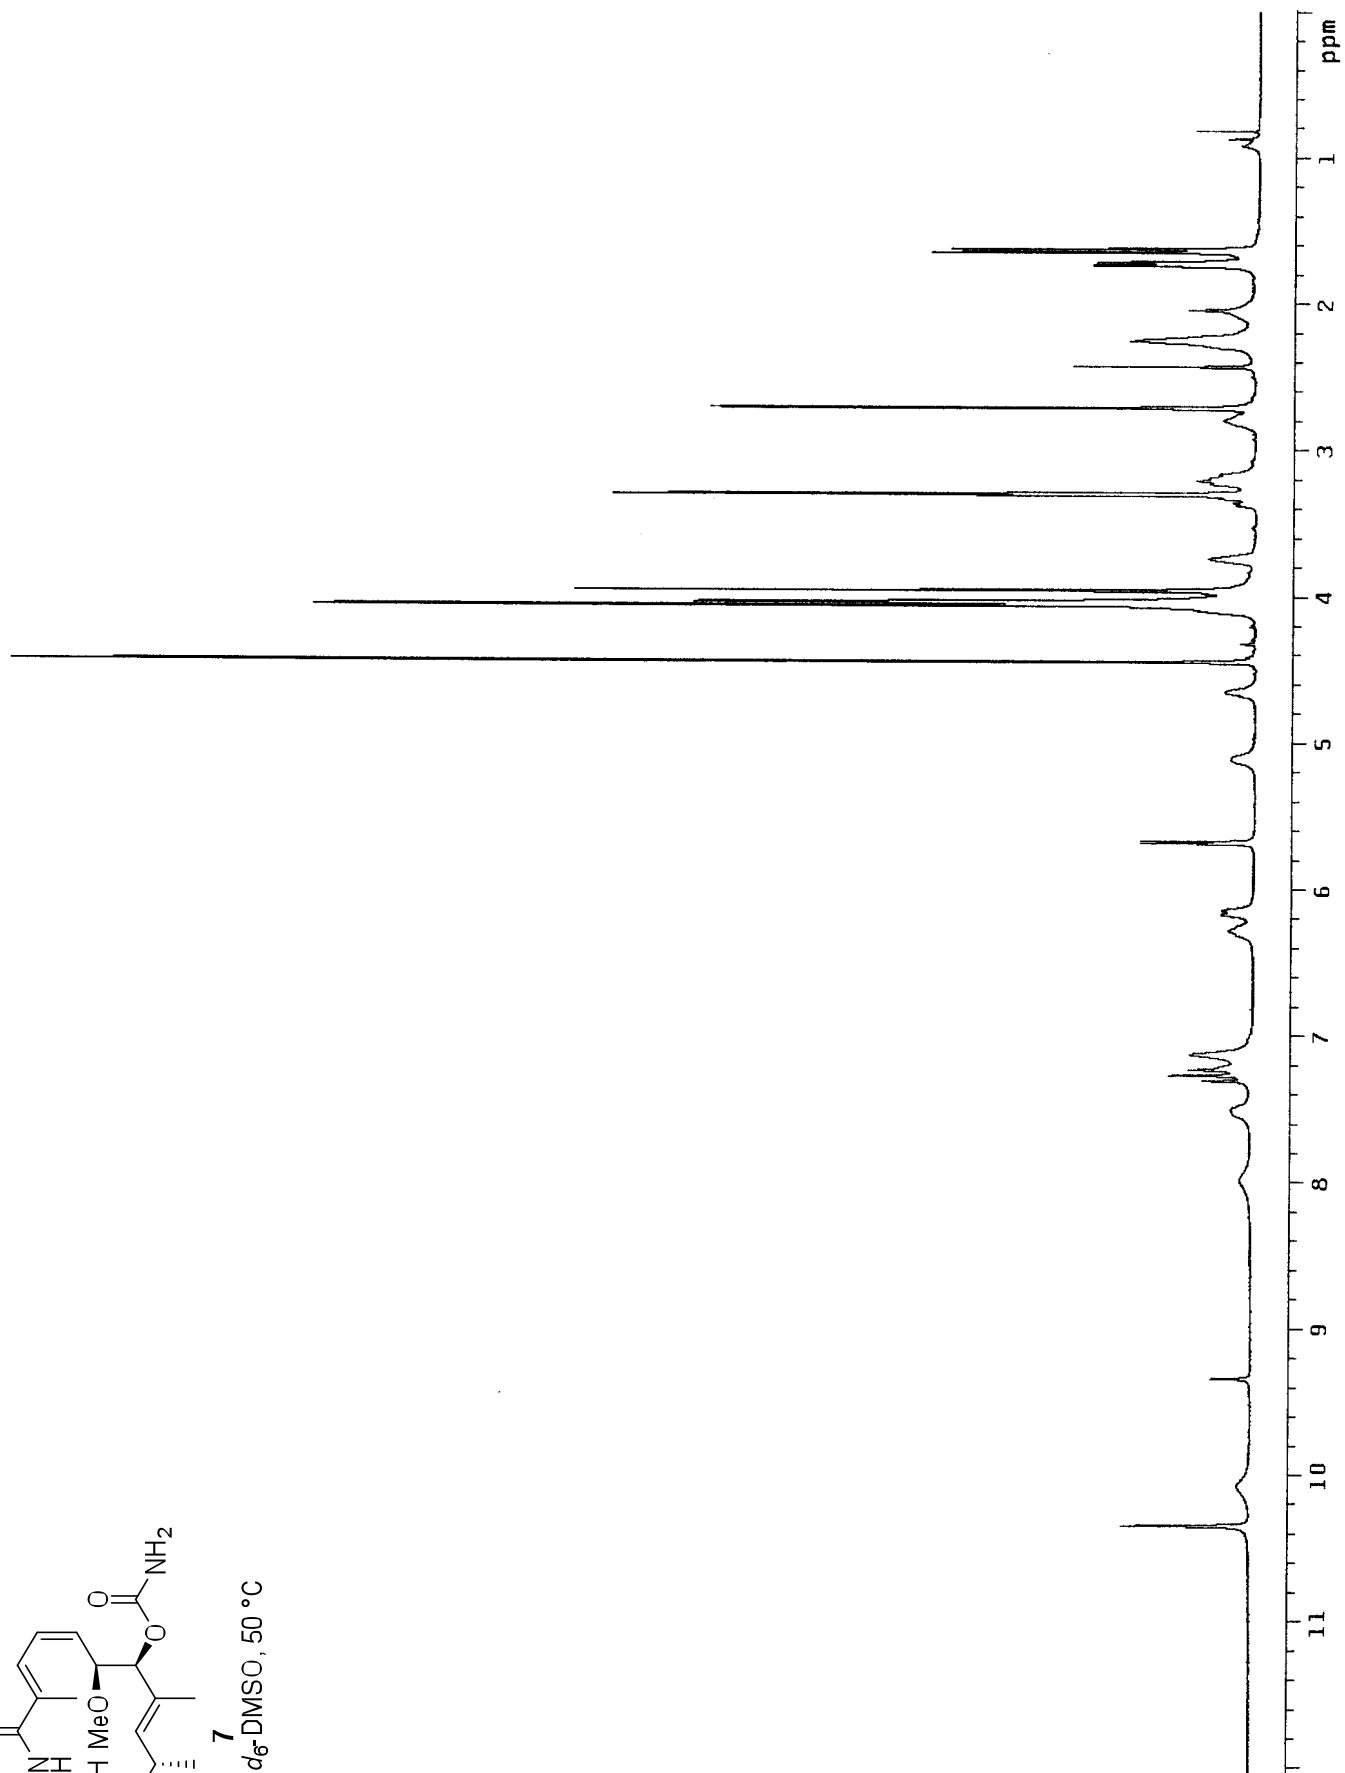



7

75 MHz, *d*<sub>6</sub>-DMSO, 50 °C

SI-79

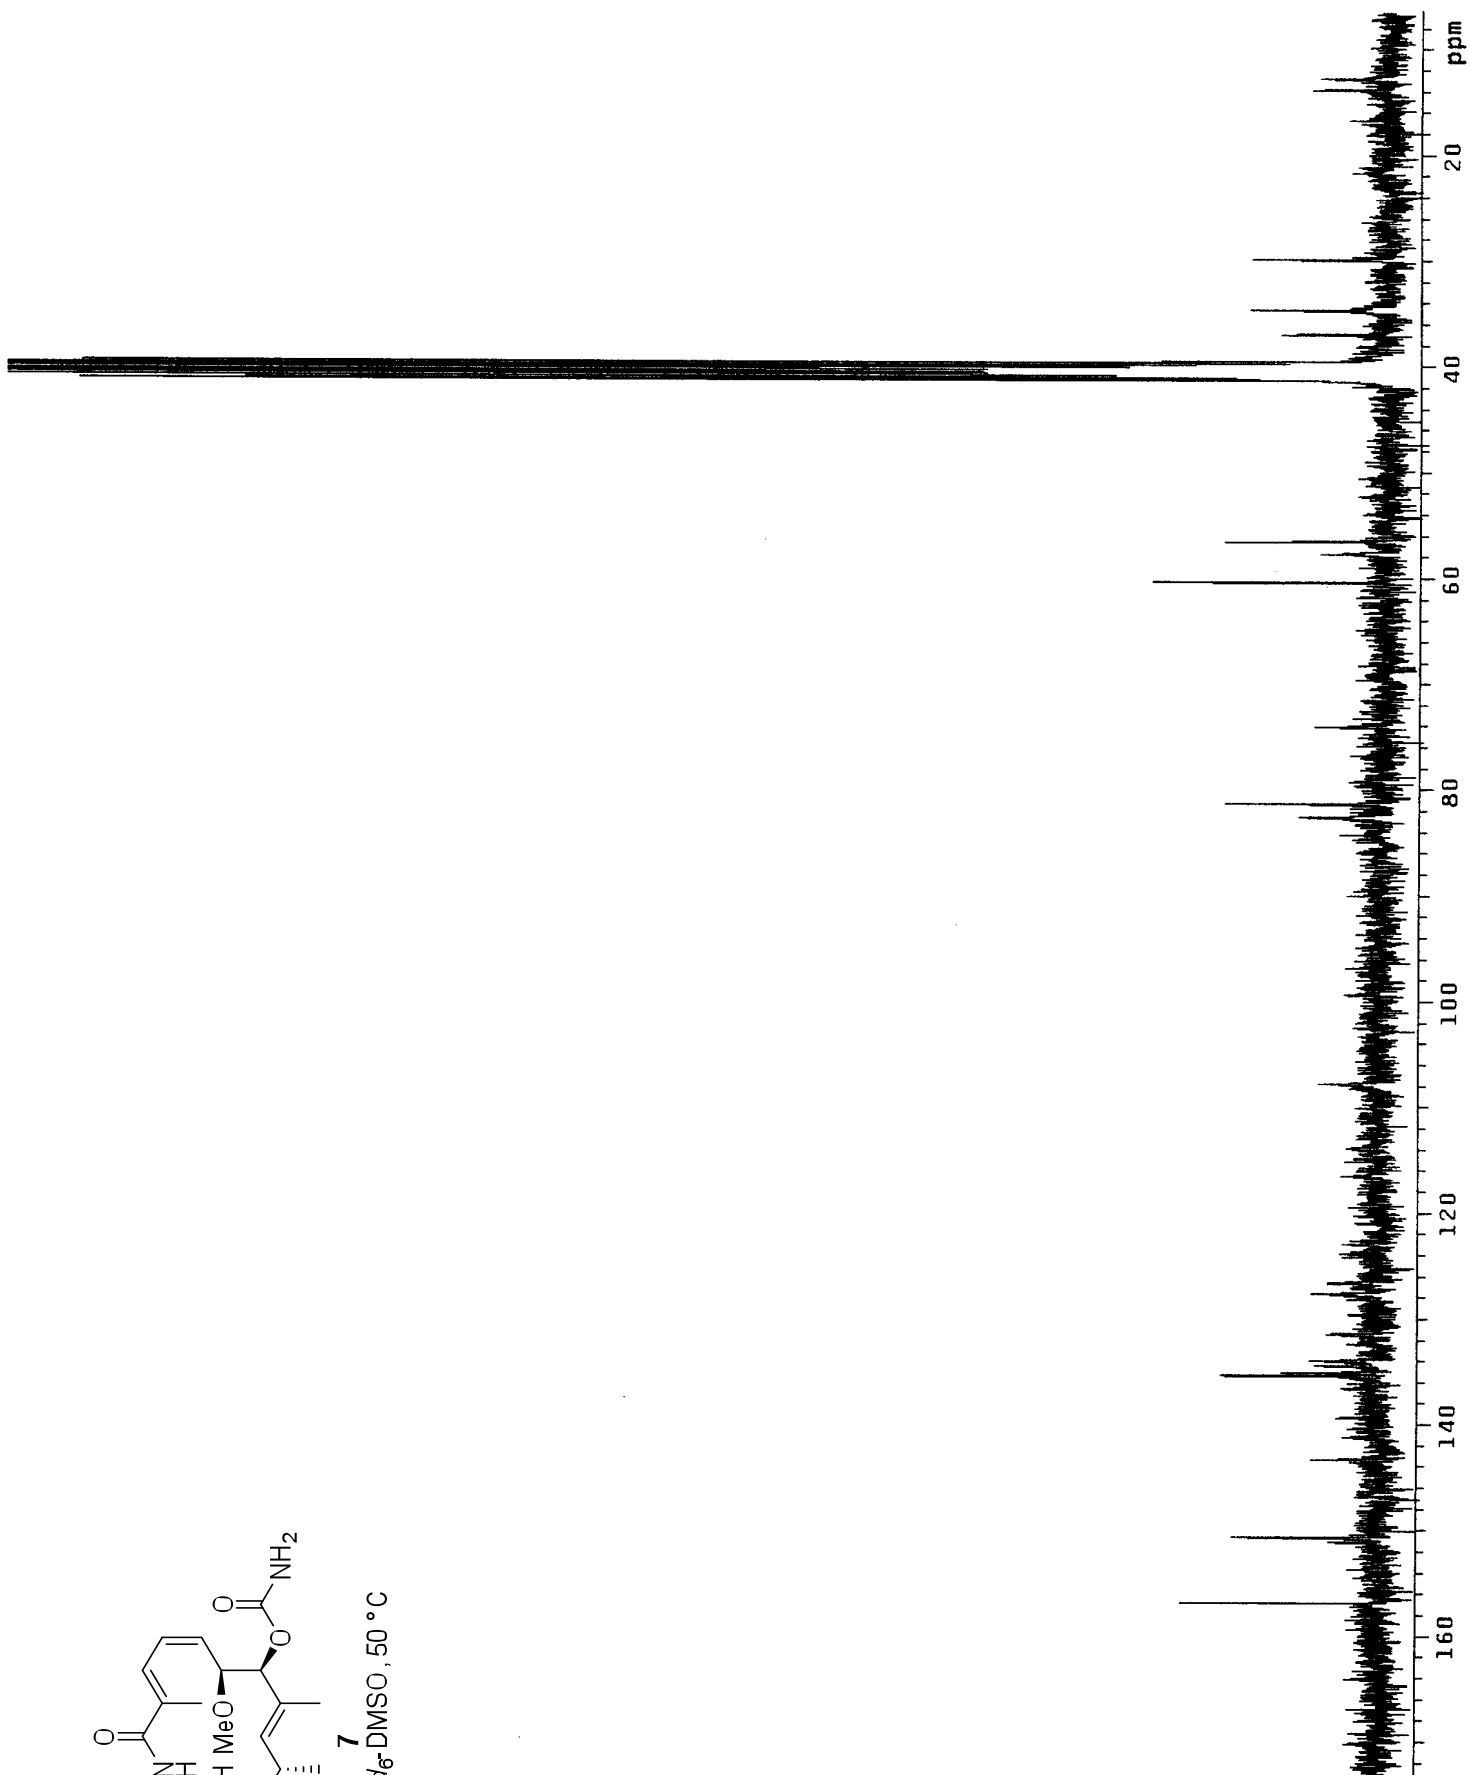

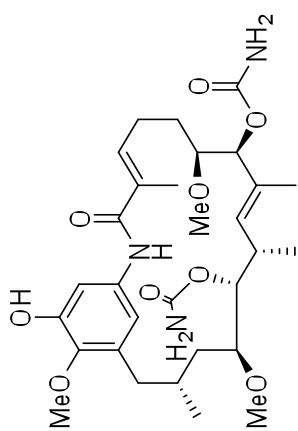

**8**

300 MHz,  $d_6$ -DMSO, 50 °C

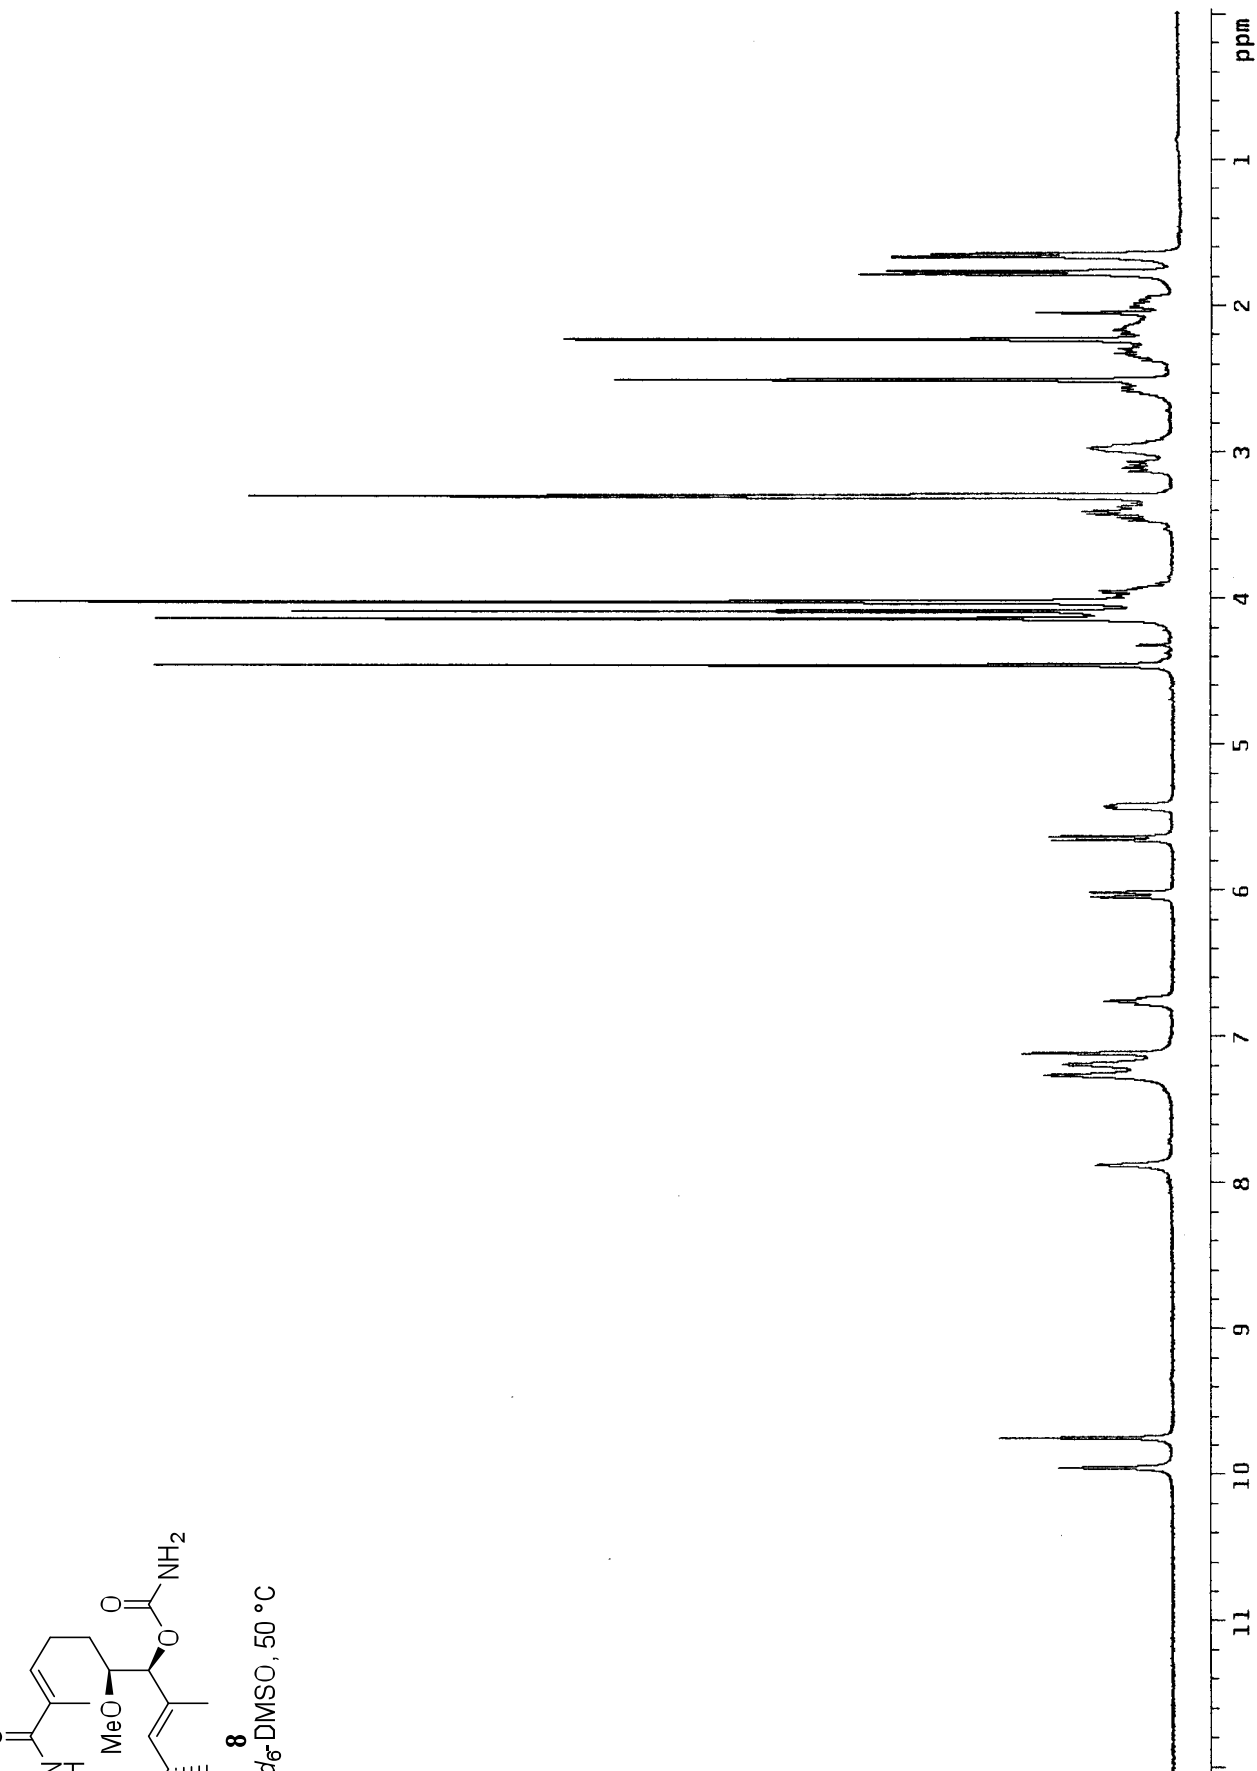

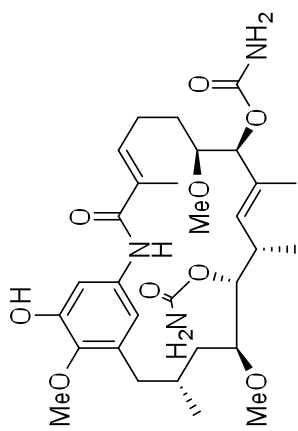

**8**

75 MHz, *d*<sub>6</sub>-DMSO, 50 °C

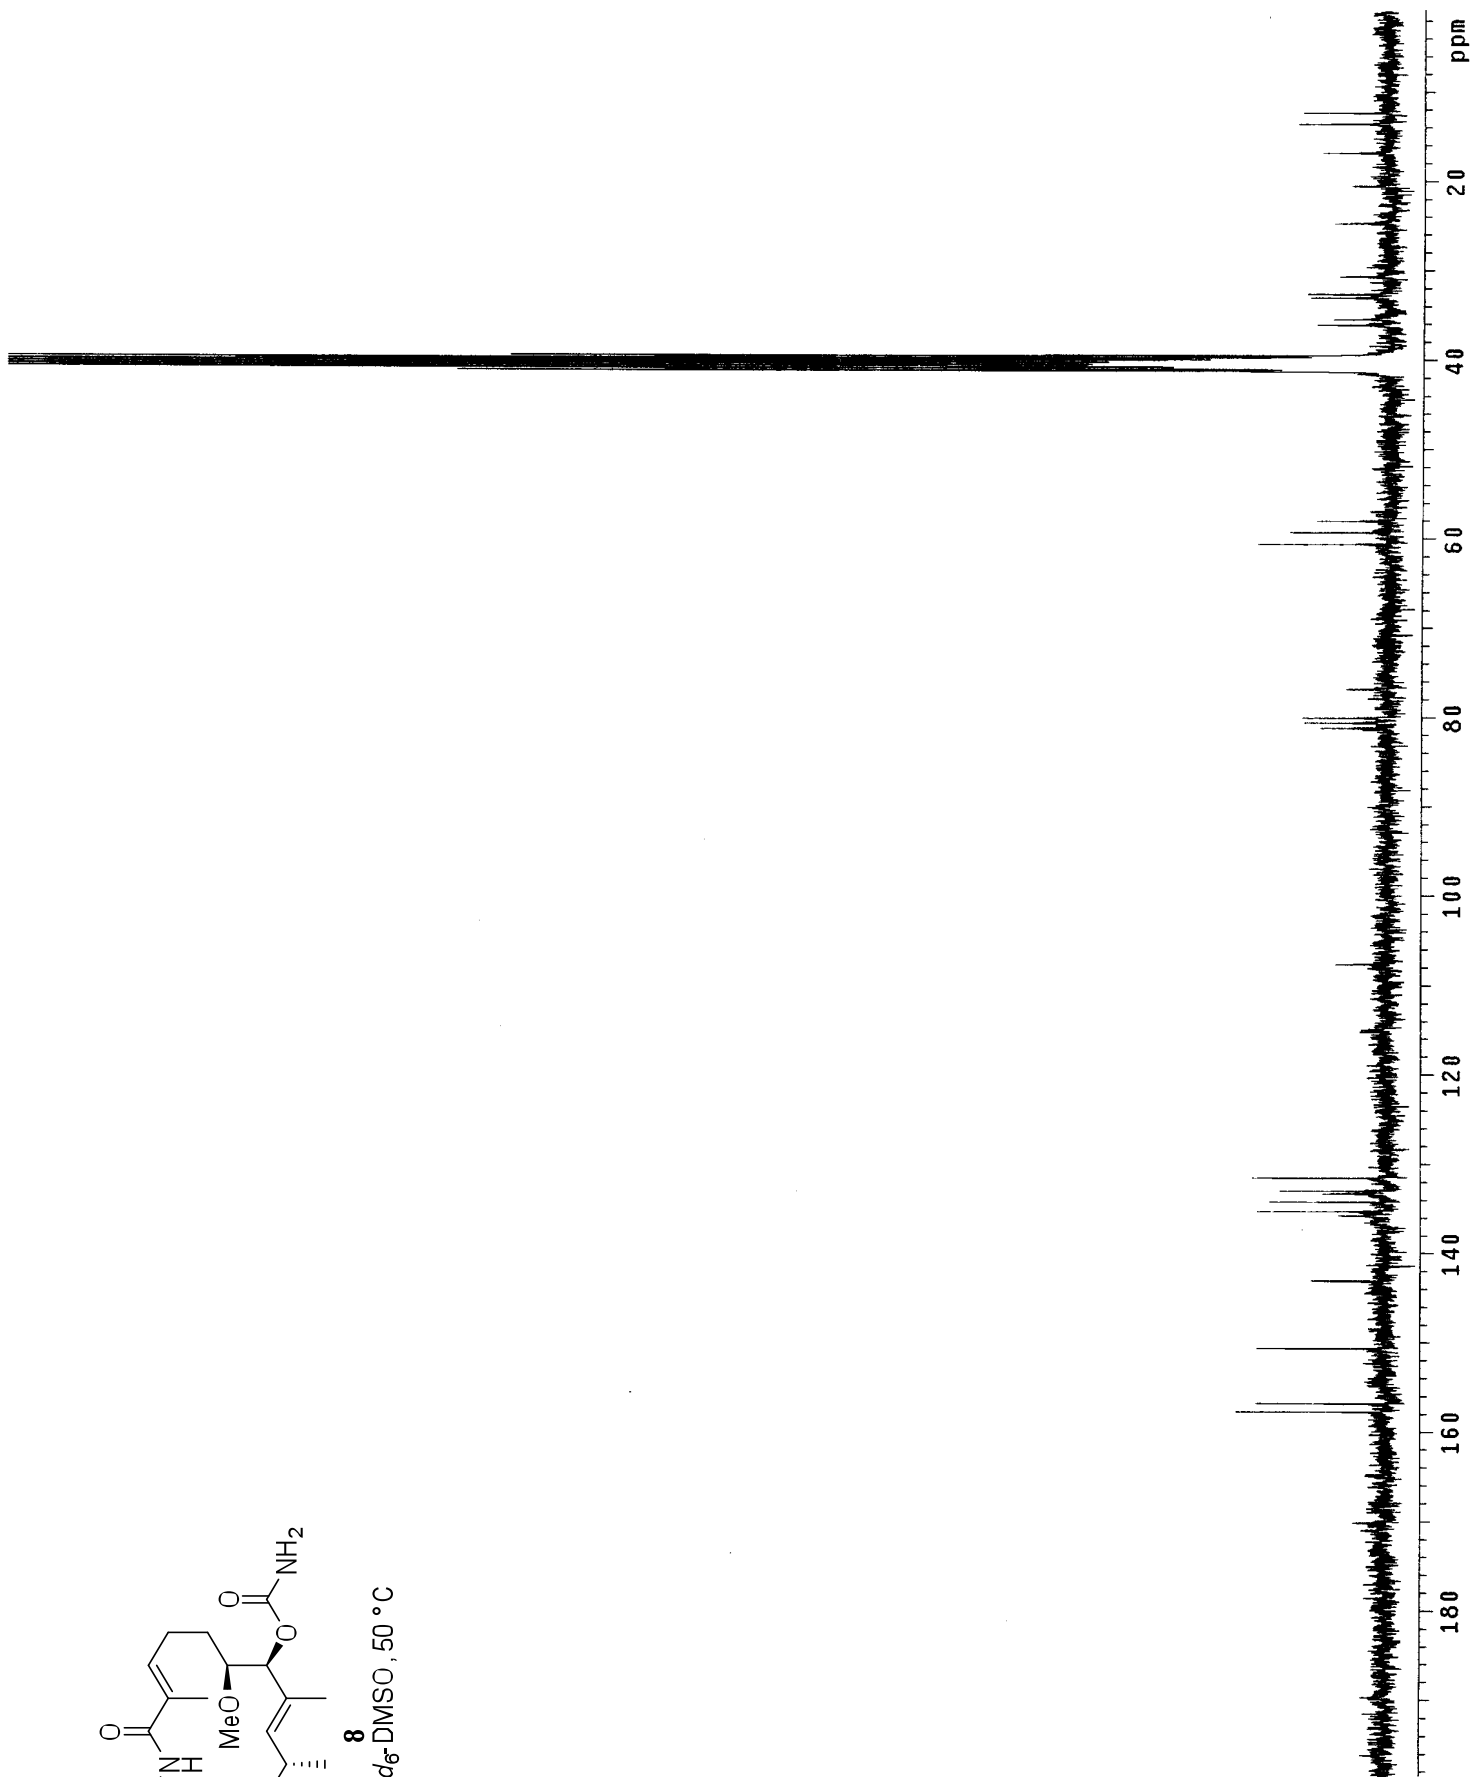

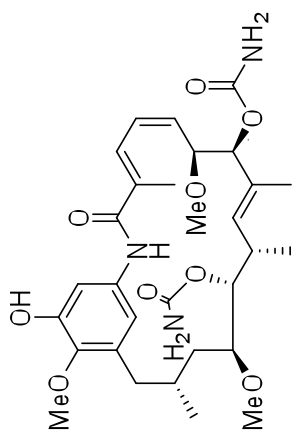

**9**

400 MHz, *d*<sub>6</sub>-DMSO, 50 °C

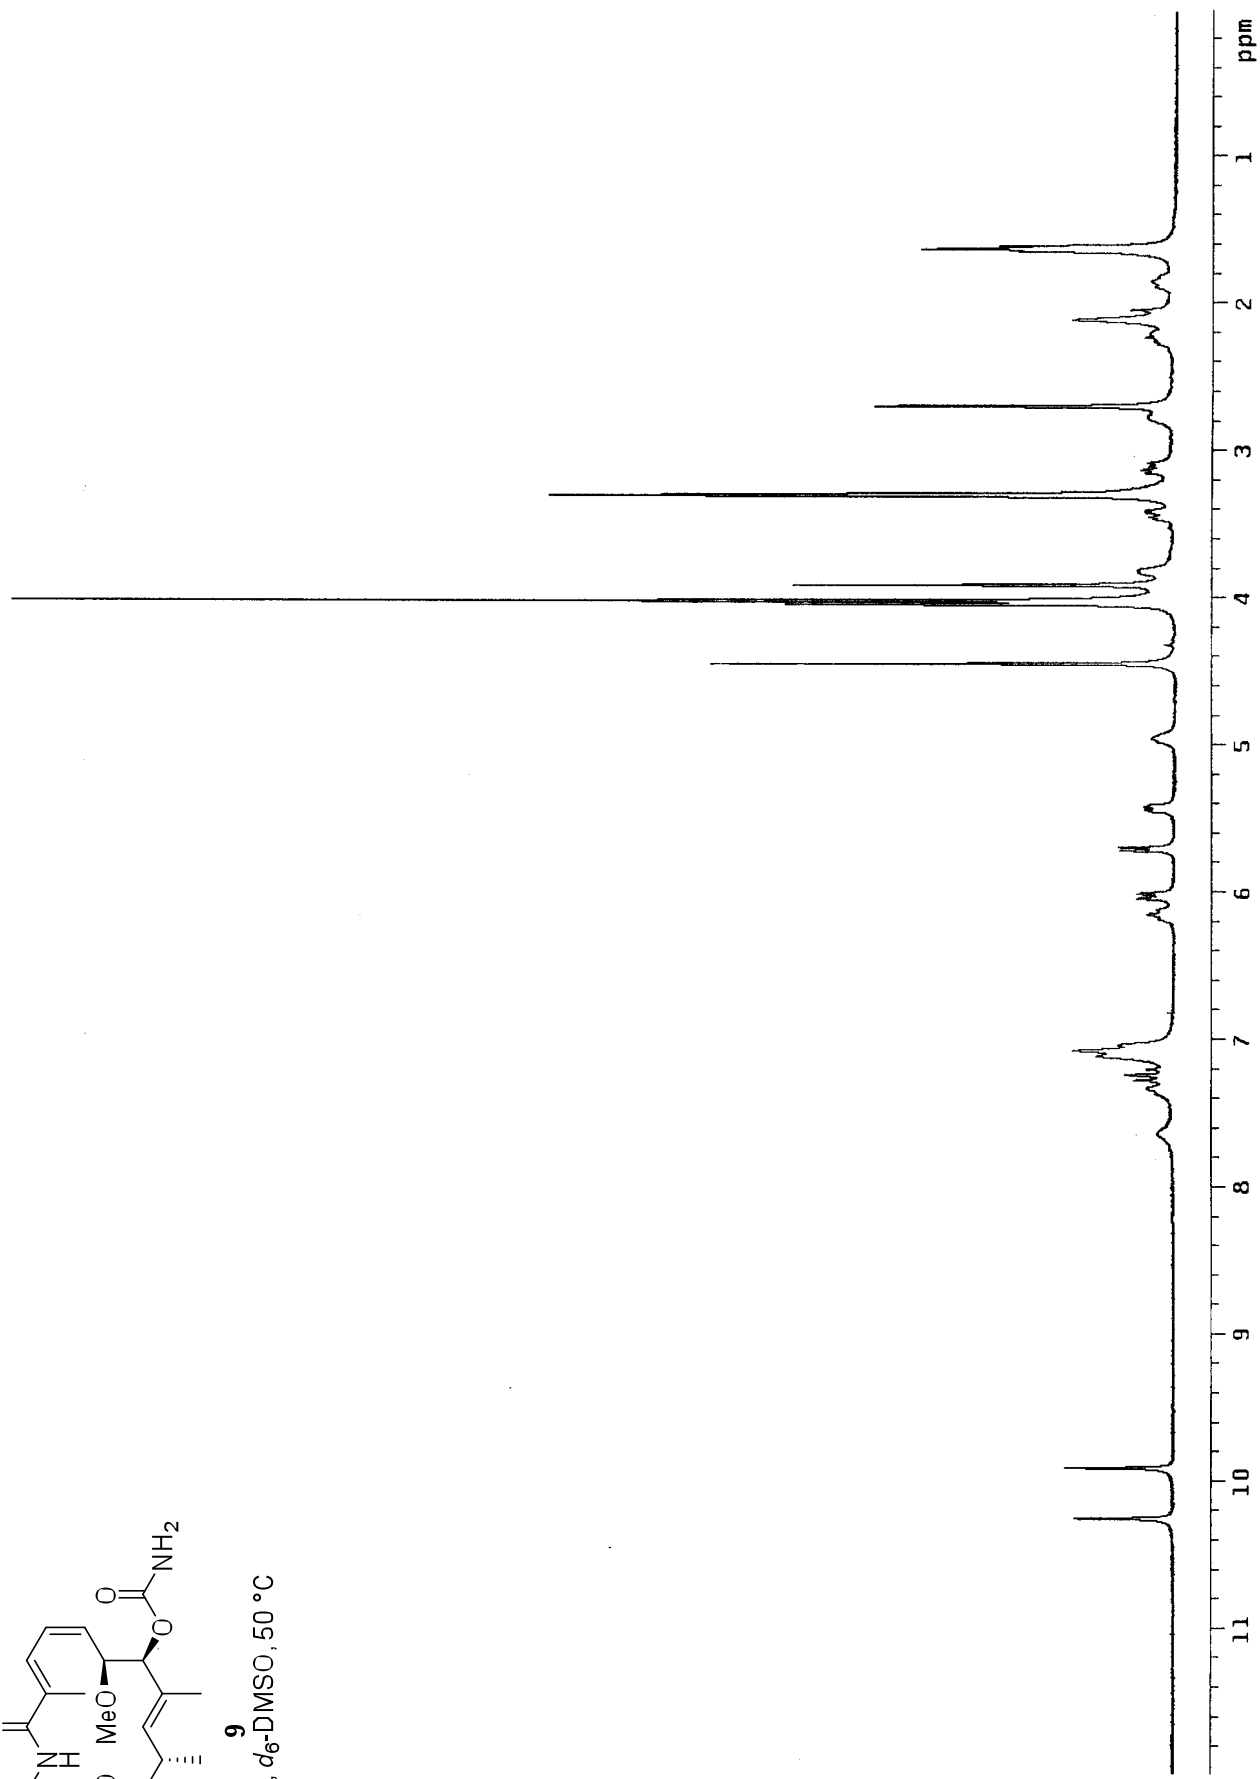

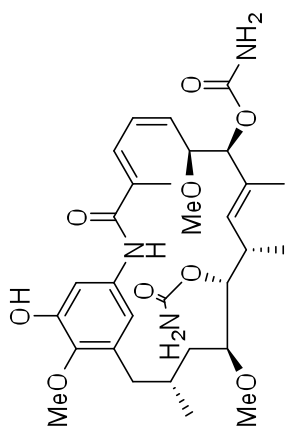

**9**

75 MHz,  $d_6$ -DMSO, 50 °C

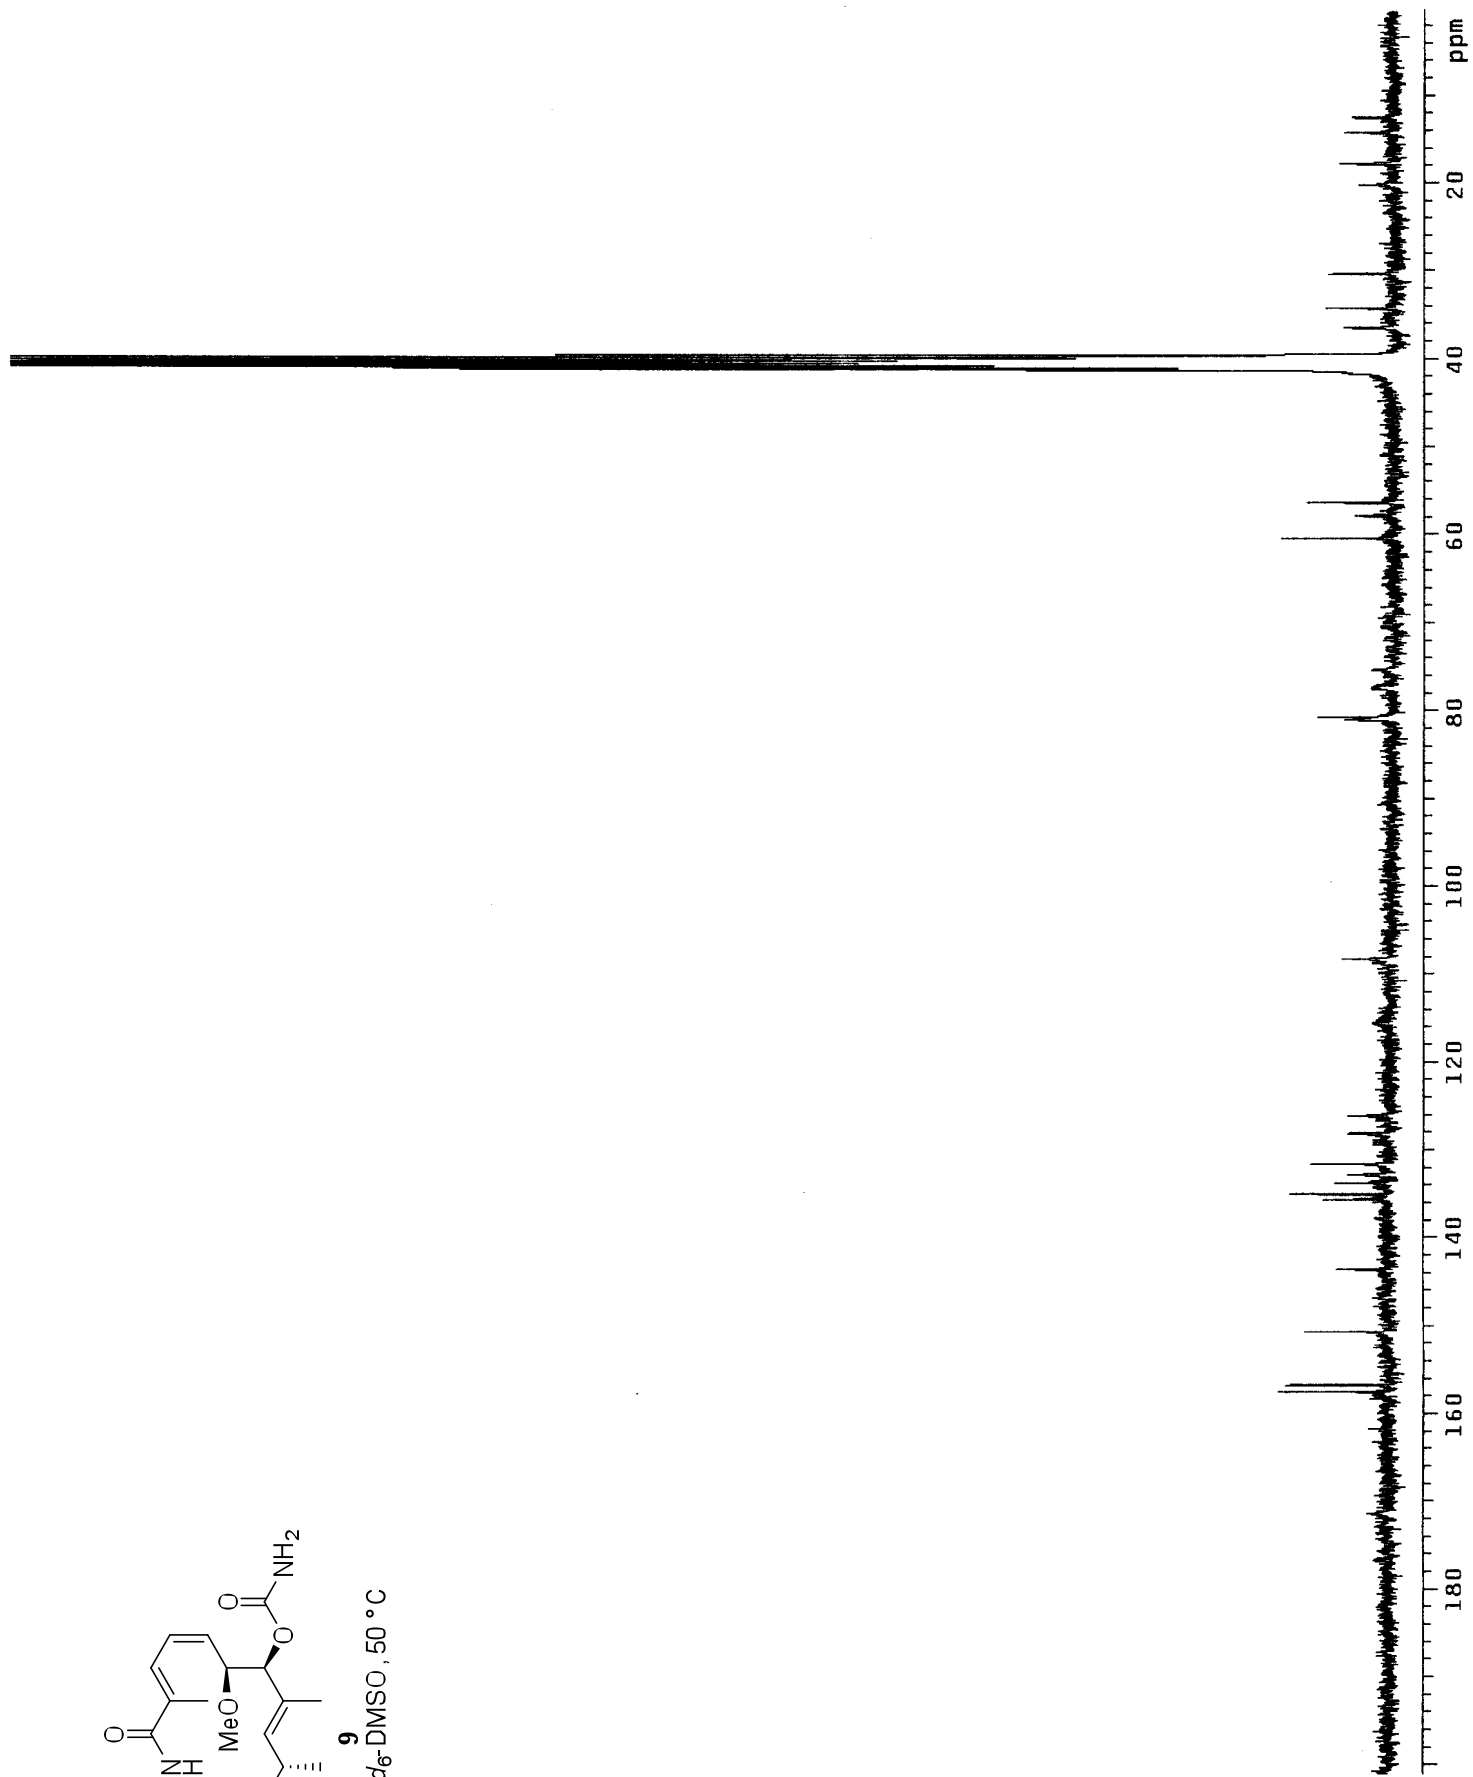



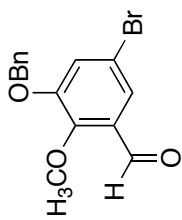

15a

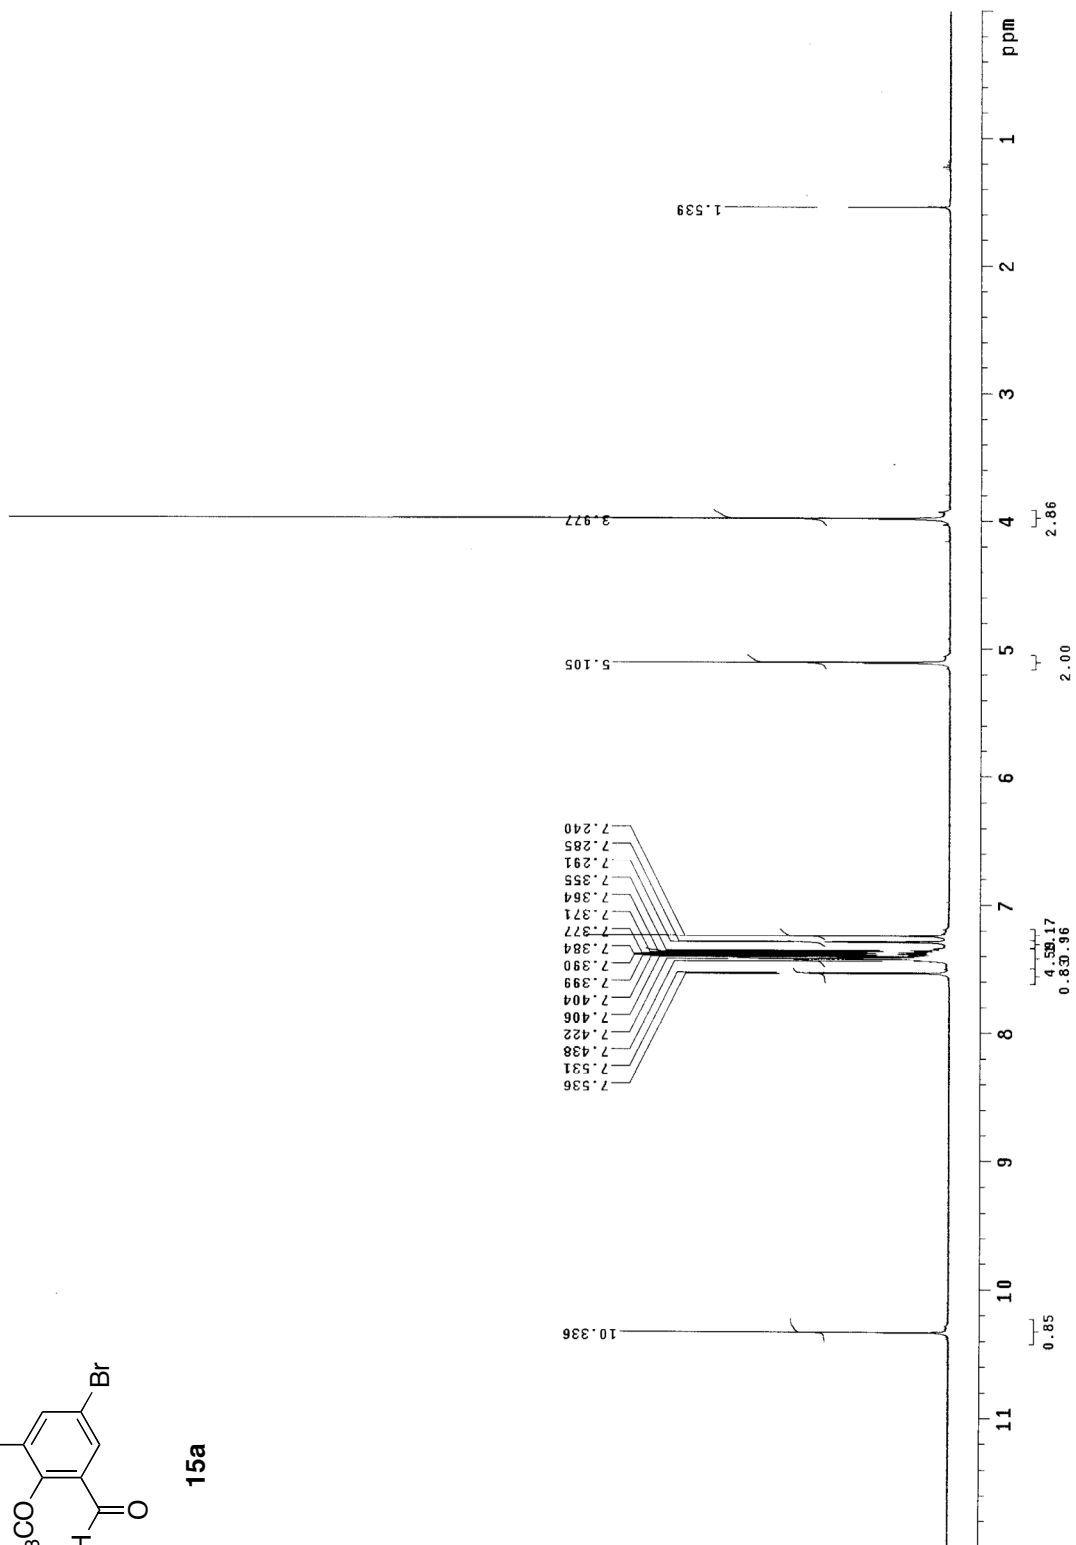

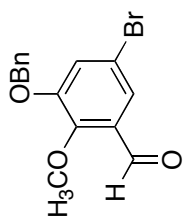

15a

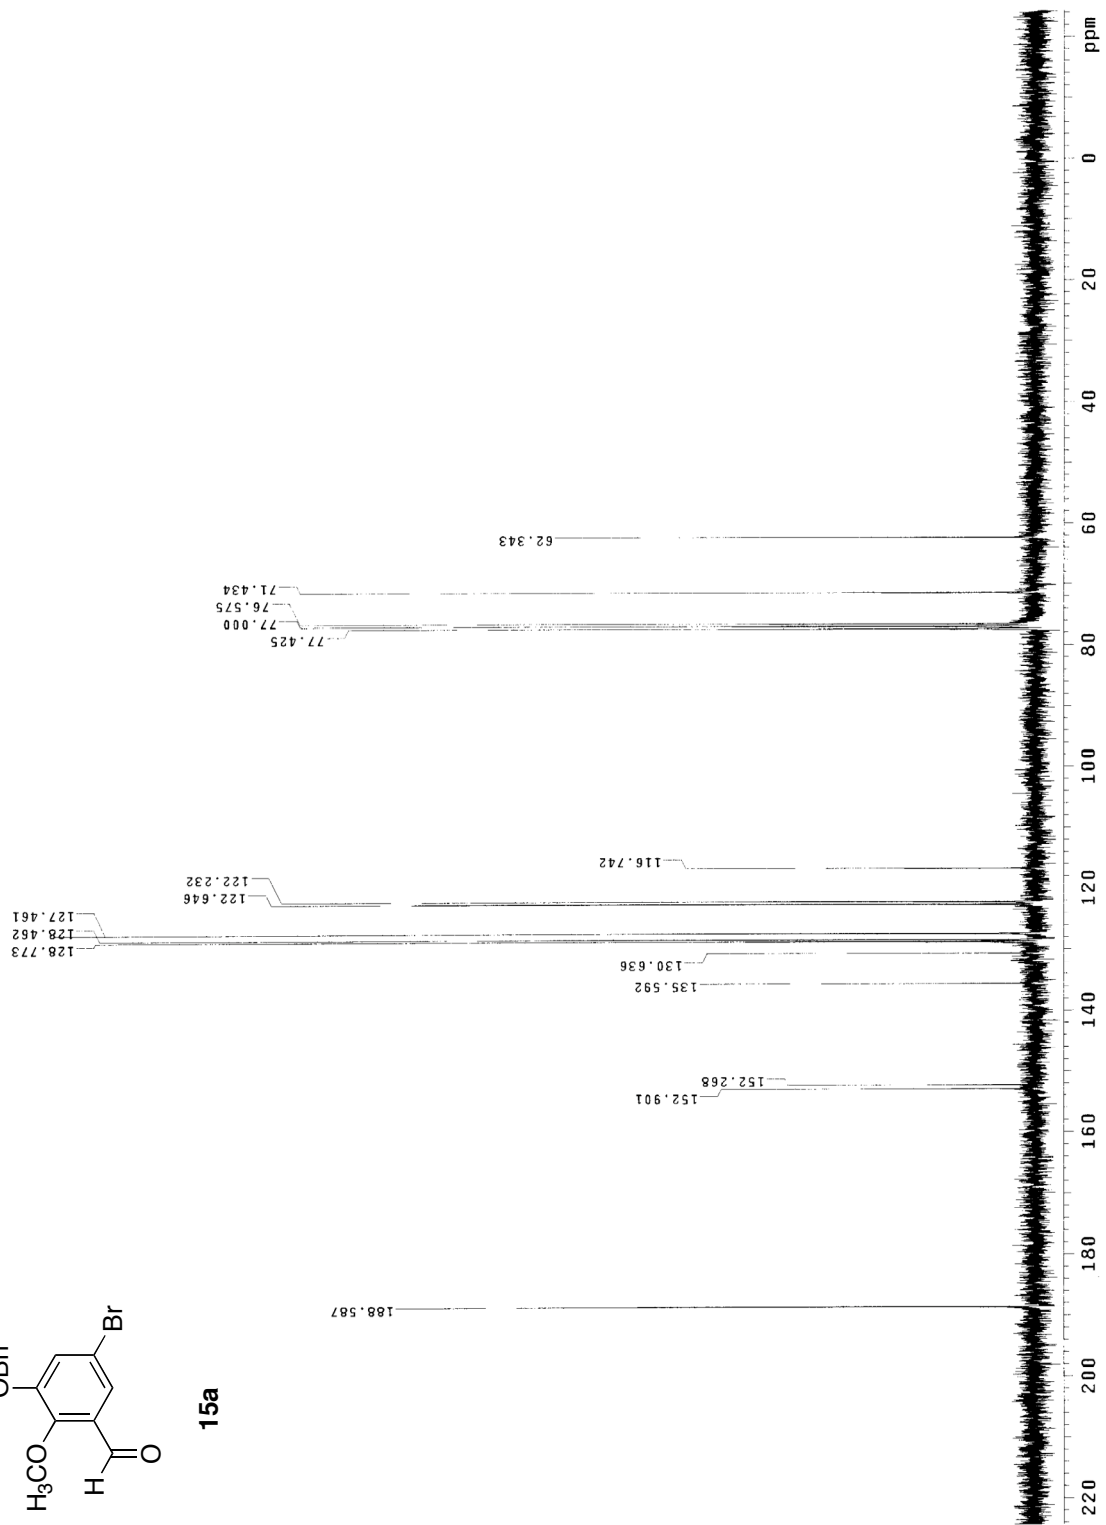

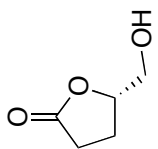

26

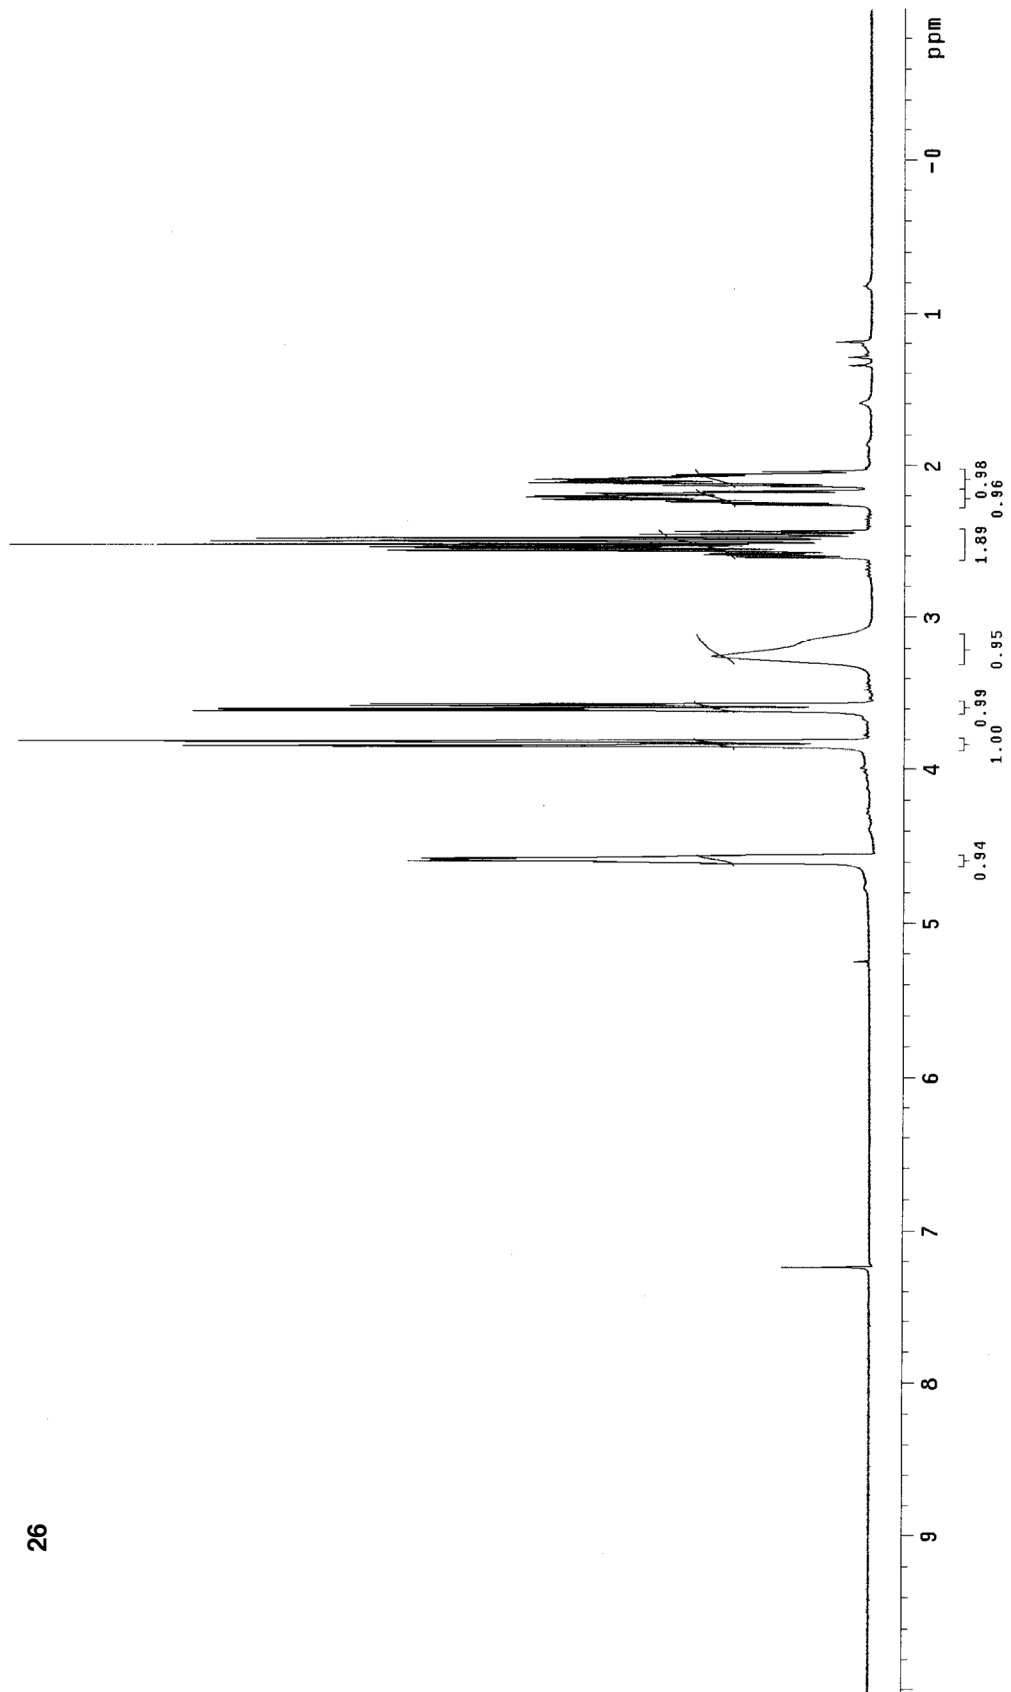

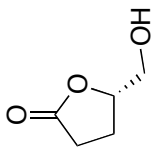

26

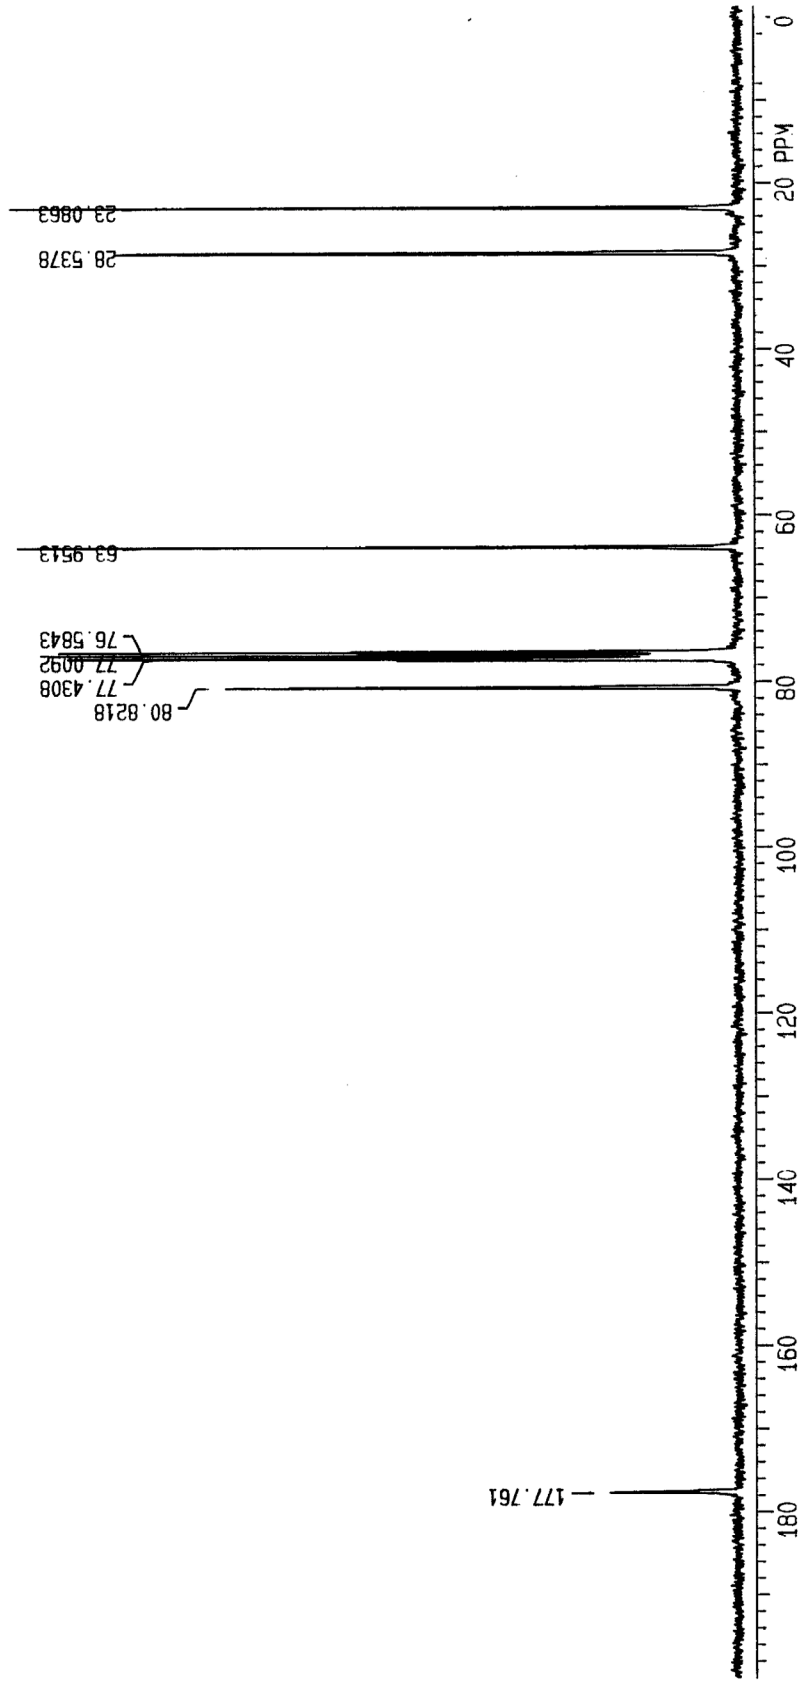

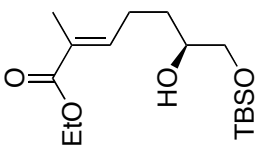

27

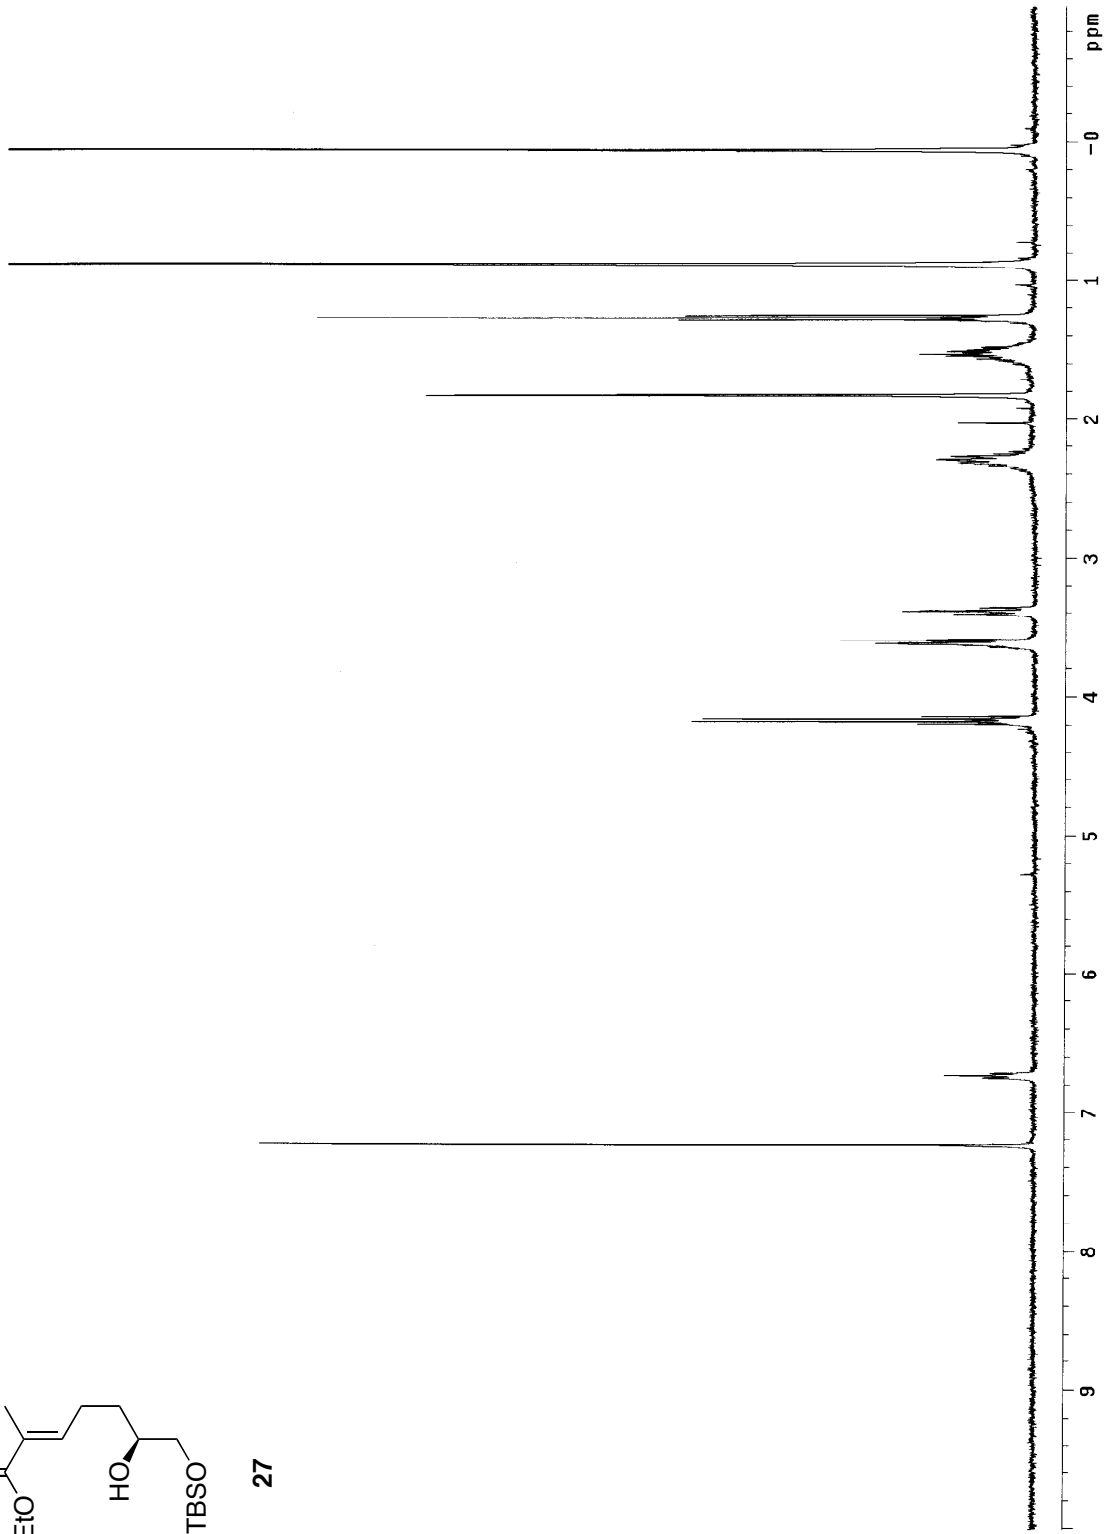

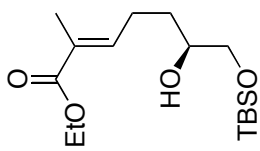

27

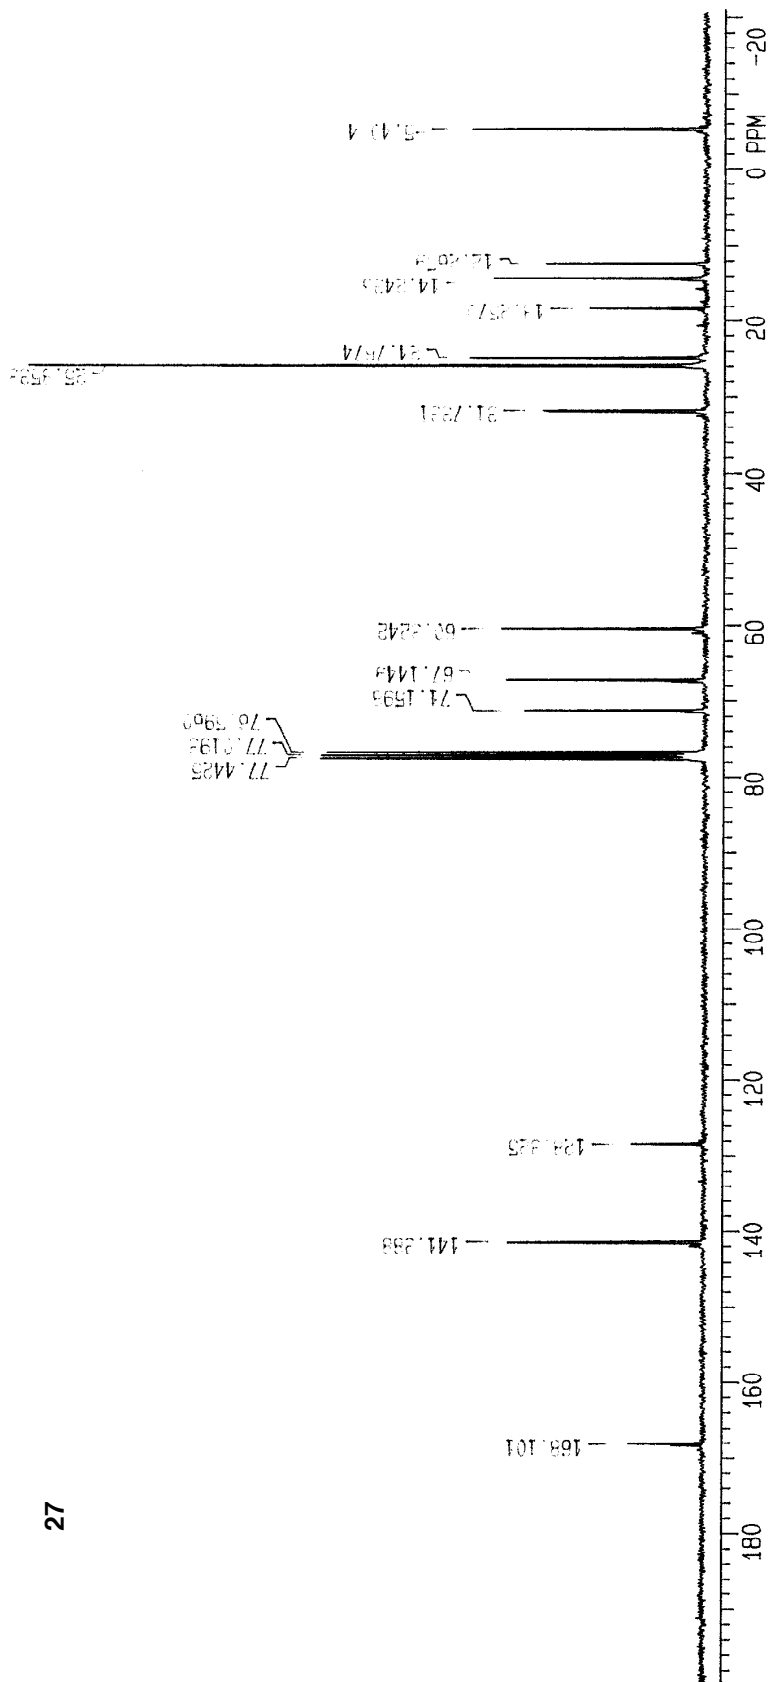

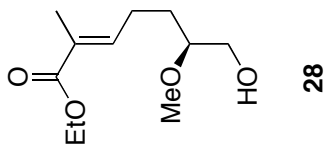

28

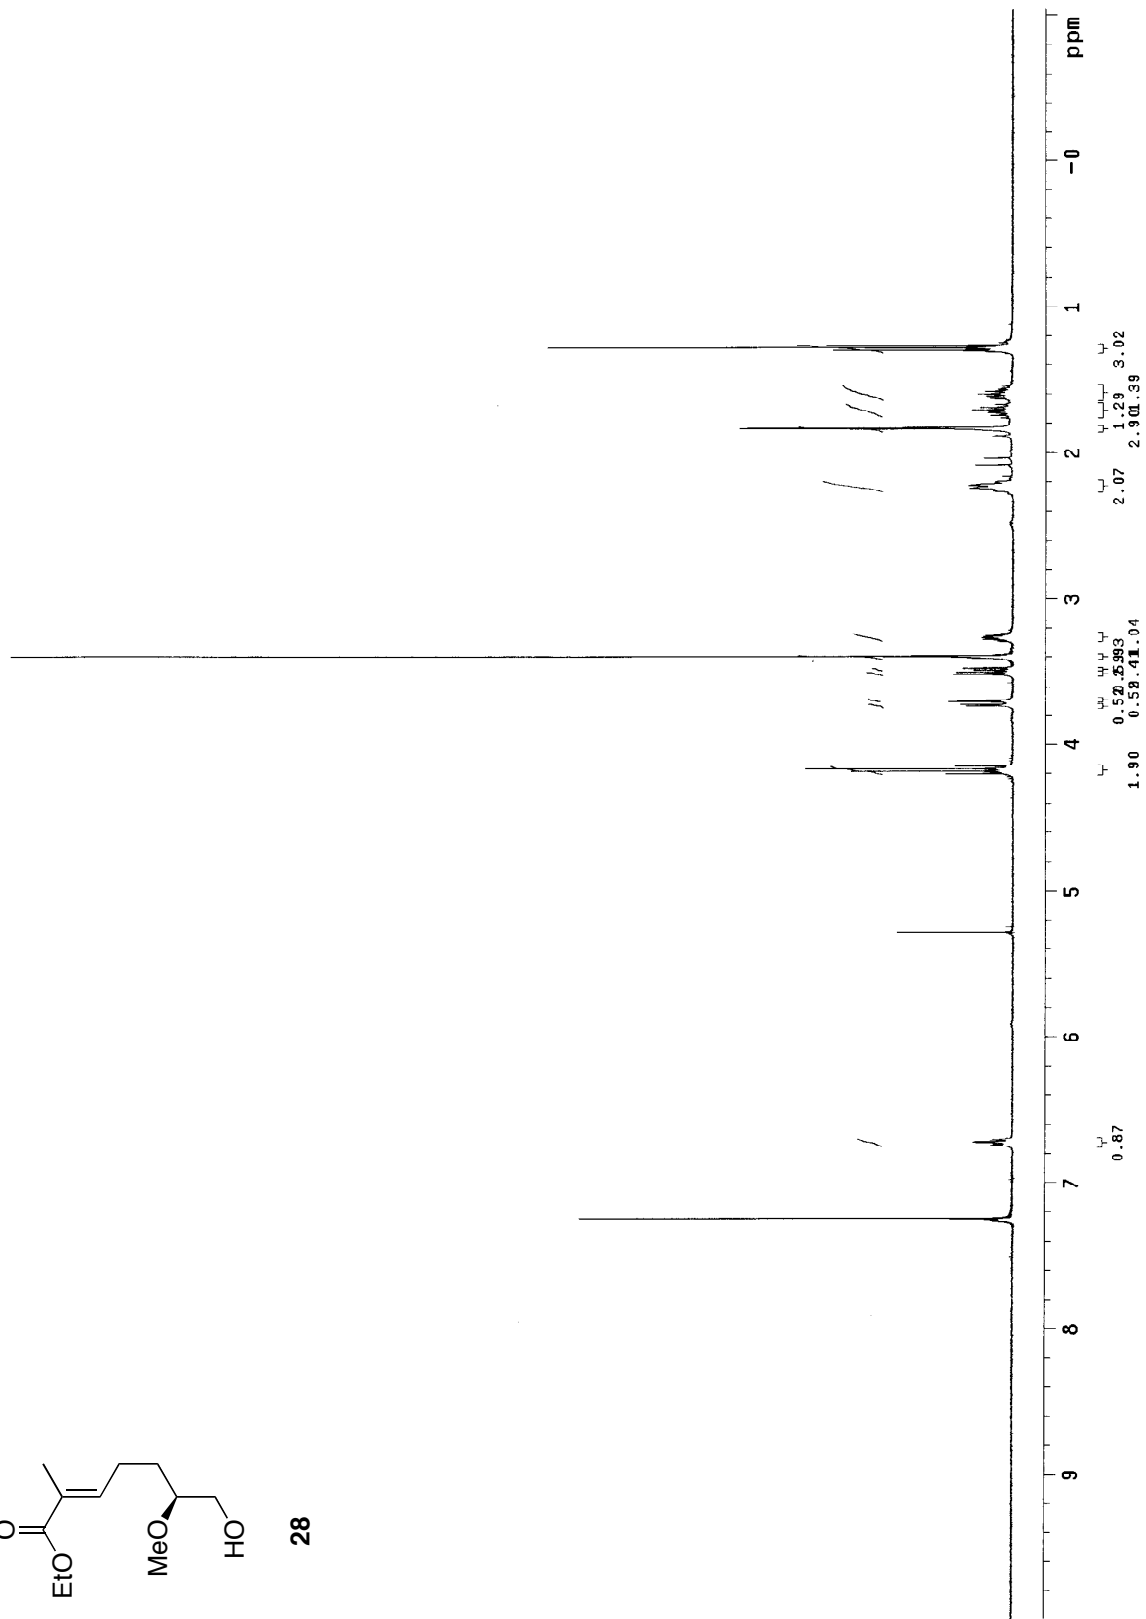

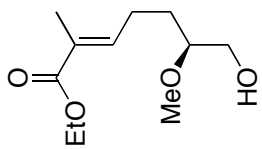

28

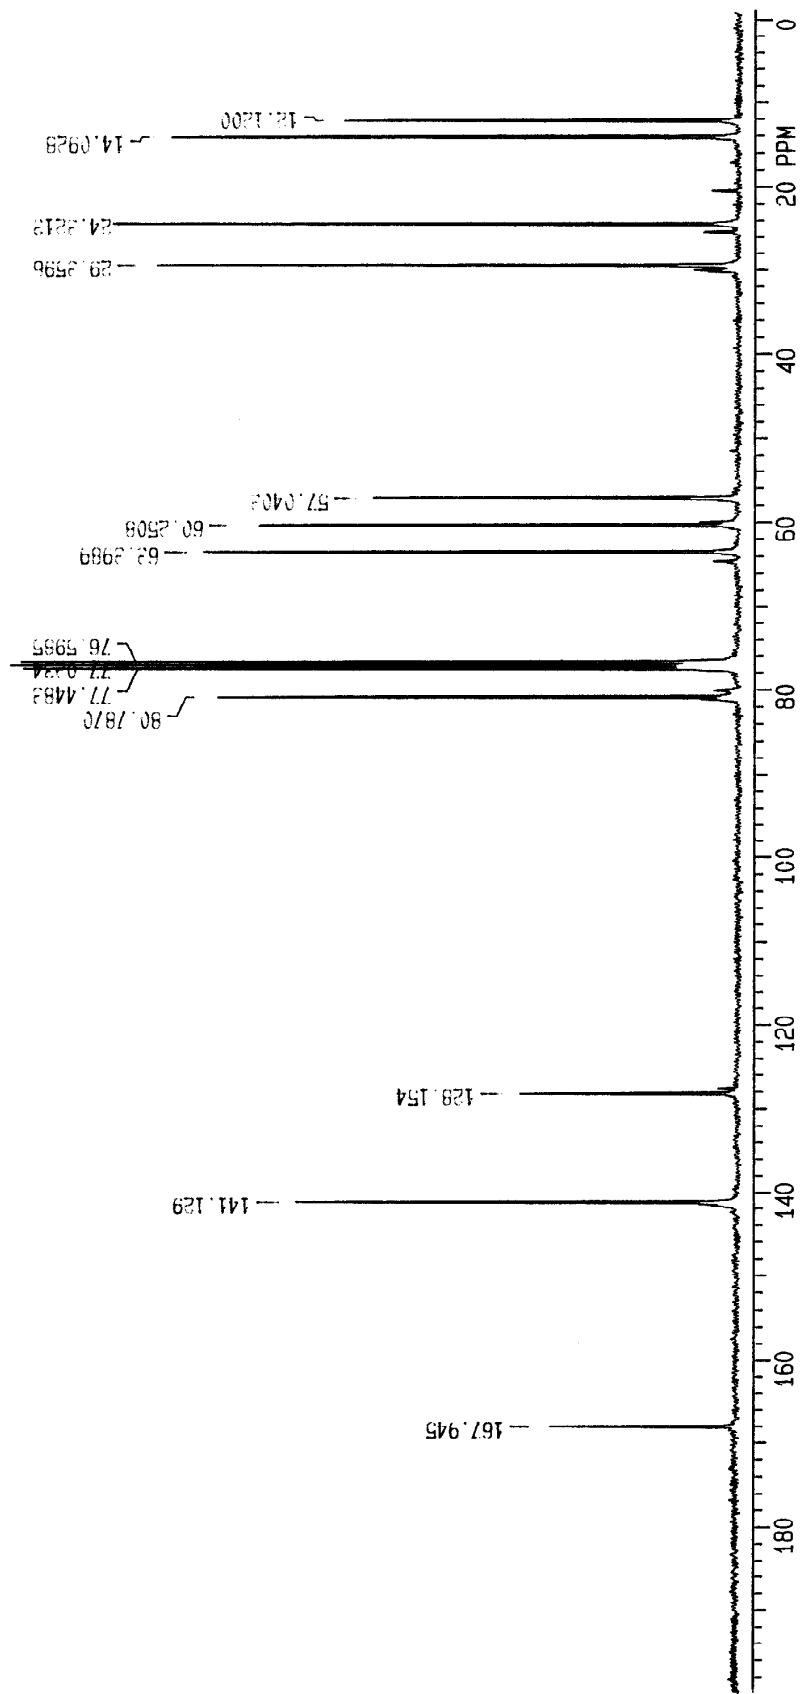





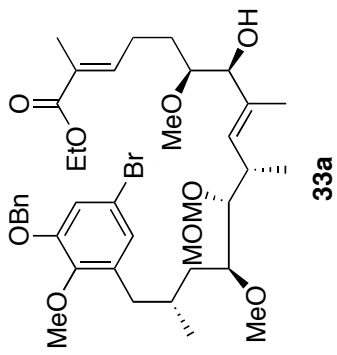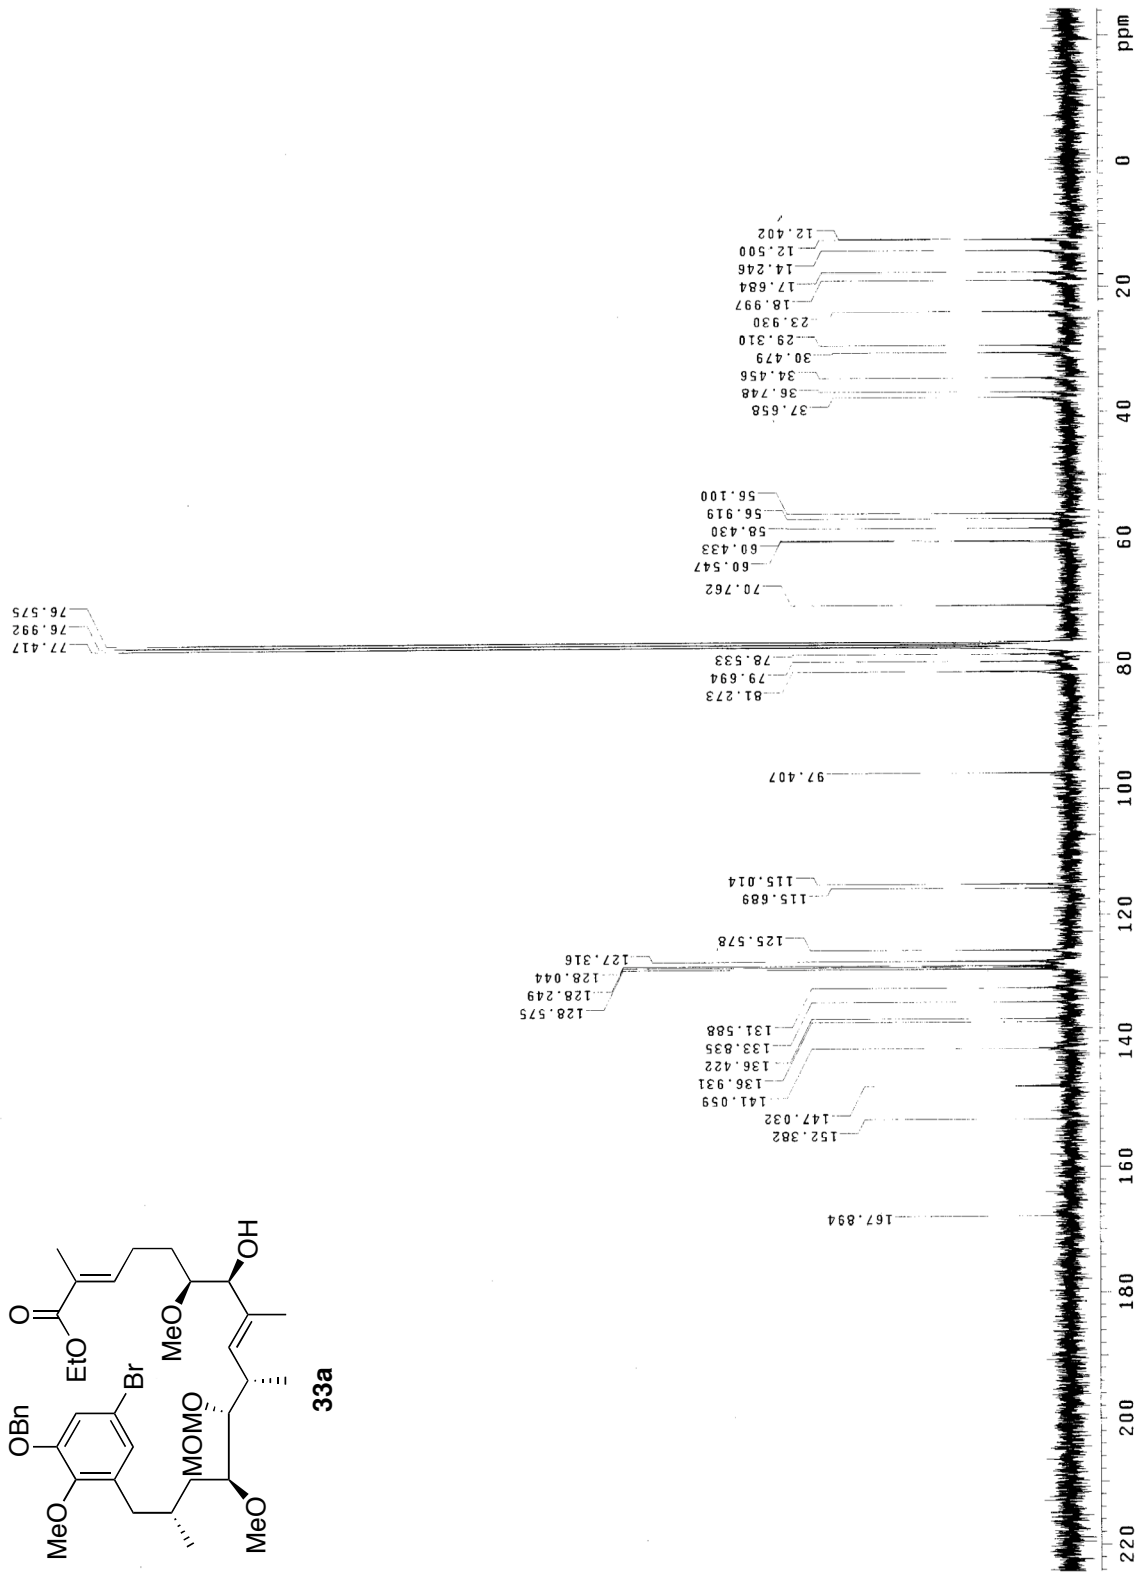

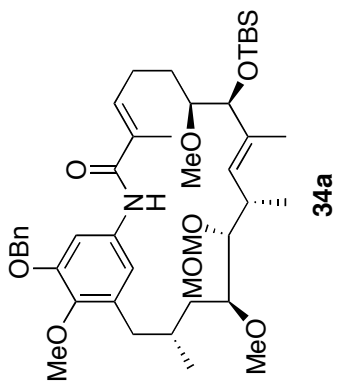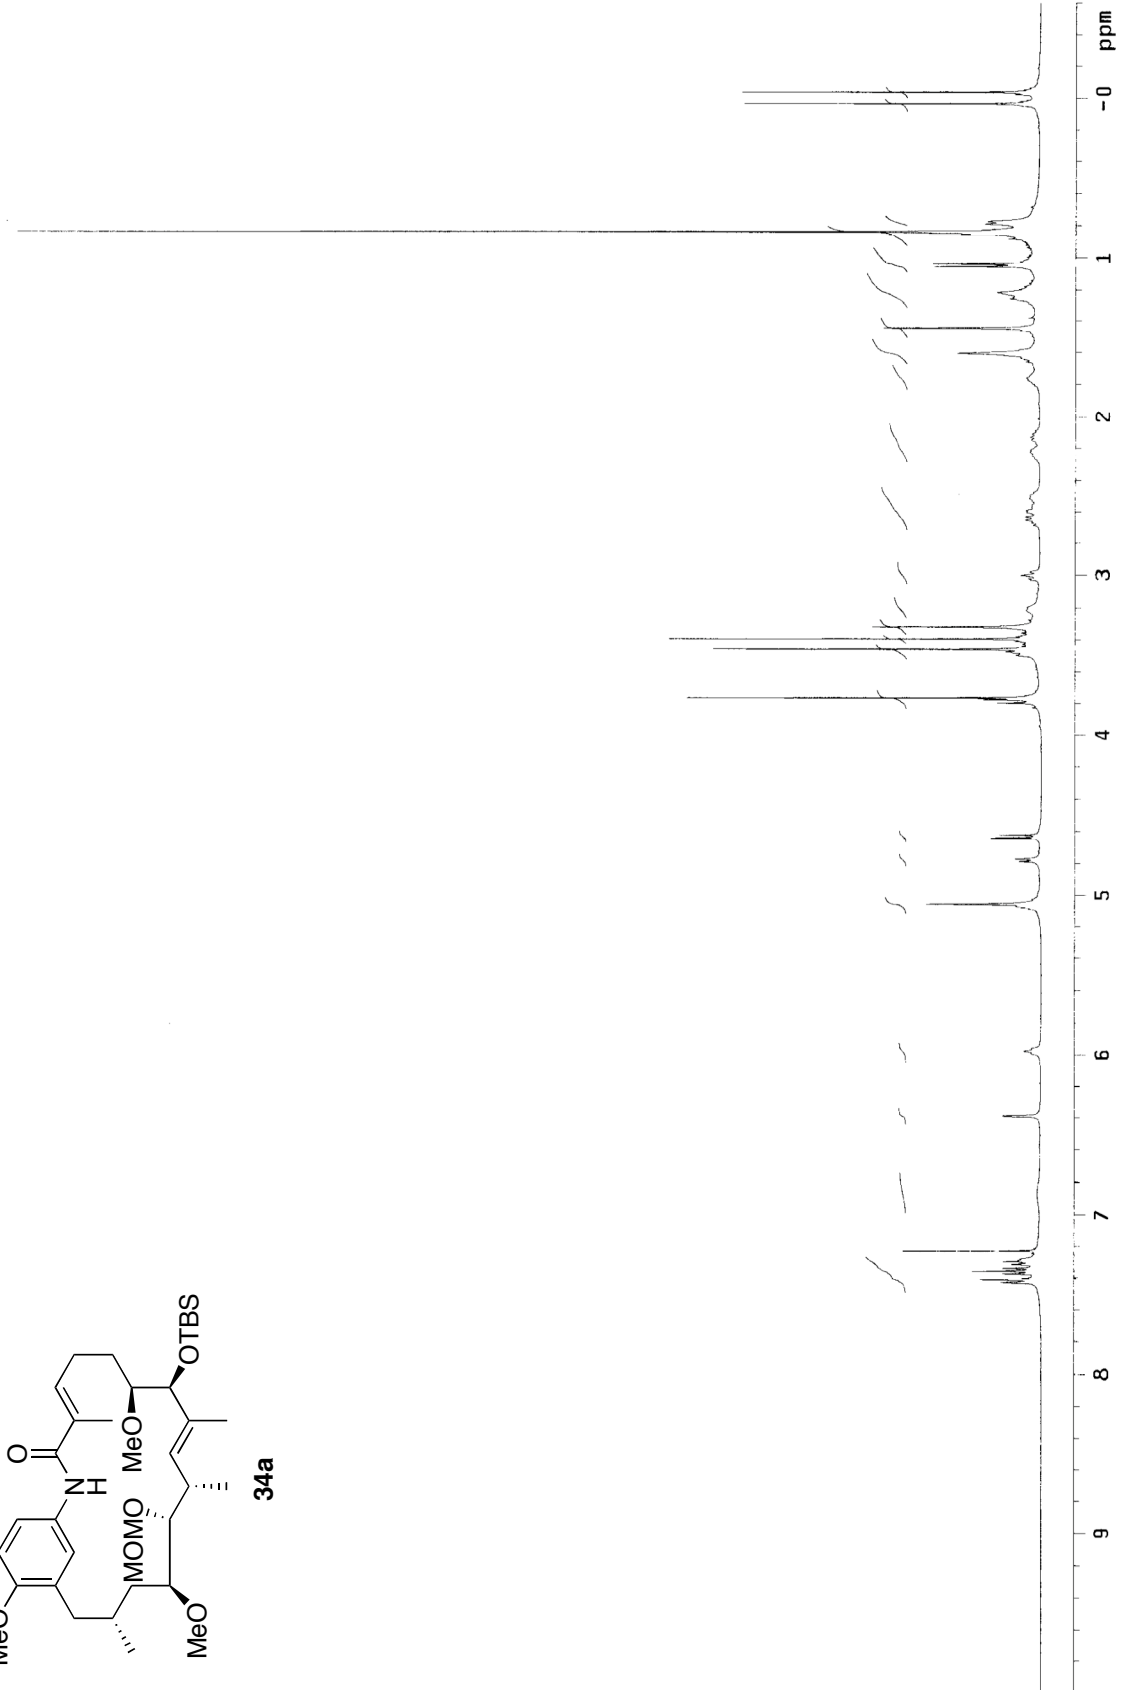

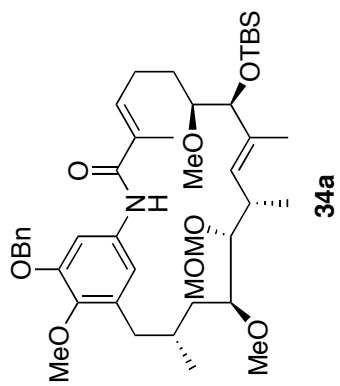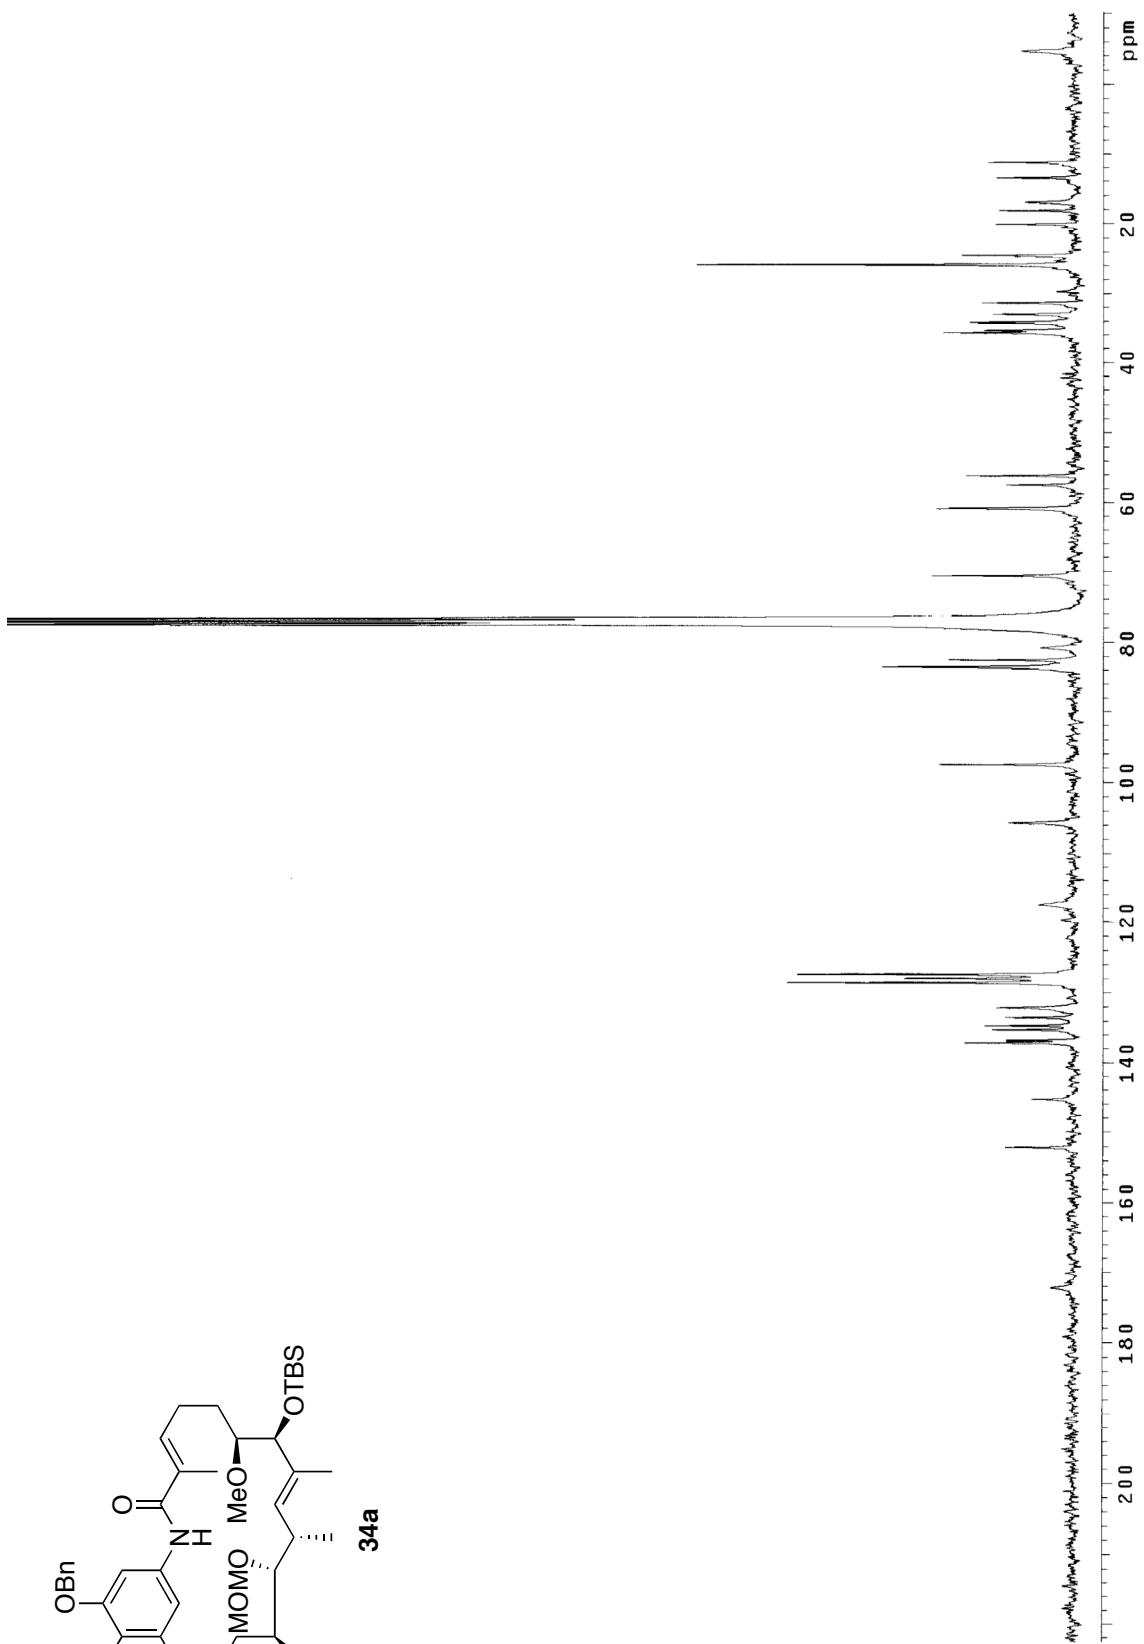

Supplement: NIHMS196595-supplement-2_si_002.pdf [file NIHMS196595-supplement-2_si_002.pdf]
